# Supplementary material for: Turning Saccharomyces cerevisiae into a Frataxin-Independent Organism
Source: PLoS Genet. 2015 May 21;11(5):e1005135. doi: 10.1371/journal.pgen.1005135 (PMC4440810; doi:10.1371/journal.pgen.1005135)
Supplement: S2 Table — Isu1/IscU proteins from the RefSeq non-redundant database (total number of 6064) were aligned according to the amino acid at position X of the 12 amino acid motif LPPVK LH CSX LA. In all, 21 lists were collected, one for each amino acid at position X and a no-alignment list. The lists were manually edited, retaining one entry for each species. For each entry, columns were annotated with the species name, accession number, taxonomic category, and the sequence of the 12 amino acid motif. The sequences were scored + if they contained 8 or more amino acids identical with the motif present in yeast Isu1 and 0 if they contained 7 or less identical amino acids. The sequences were scored * for exceptions if they deviated from the rule that Isu1/IscU proteins use methionine at position X and prokaryotic proteins do not use methionine at that position. (XLSX) [file pgen.1005135.s003.xlsx]

## Sheet: M at 141
#	M at position 141	accession	organism	12 aa block	aligns	exception	comments
1	Acromyrmex echinatior: Iron-sulfur cluster assembly enzyme ISCU, mitochondrial	EGI60706	Eukaryota; Metazoa; Ecdysozoa;	lppvk lh csm la	+		insect
2	Acyrthosiphon pisum: ACYPI001547	BAH71008	Eukaryota; Metazoa; Ecdysozoa;	lppvk lh csm la	+		insect
3	Aedes aegypti: AAEL004071-PA	EAT44566	Eukaryota; Metazoa; Ecdysozoa;	lppvk lh csm la	+		insect
4	Aegilops tauschii: Iron sulfur cluster assembly protein 1, mitochondrial	EMT12599	Eukaryota; Viridiplantae; Streptophyta;	lppvk lh csm la	+		wheat fungus
5	Ajellomyces capsulatus G186AR: iron-sulfur assembly protein	EEH07812	Eukaryota; Fungi; Dikarya;	lppvk lh csm la	+		fungi
6	Albugo laibachii Nc14: iron sulfur cluster assembly protein 1 putative	CCA20082	Eukaryota; Stramenopiles; Oomycetes;	lppvk lh csm la	+		arabidopsis fungus
7	Amblyomma triste: putative iron binding protein involved in fe-s cluster formation	JAC32358	Eukaryota; Metazoa; Ecdysozoa;	lppvk lh csm la	+		tick
8	Amphimedon queenslandica: PREDICTED: iron-sulfur cluster assembly enzyme ISCU, mitochondrial-like	XP_003384054	Eukaryota; Metazoa; Porifera;	lppvk lh csm la	+		reef sponge
9	Anas platyrhynchos: Iron-sulfur cluster assembly enzyme ISCU, mitochondrial, partial	EOA96478	Eukaryota; Metazoa; Chordata;	lppvk lh csm la	+		duck
10	Ancylostoma ceylanicum: hypothetical protein Y032_0040g174	EYC14380	Eukaryota; Metazoa; Ecdysozoa;	lppvk lh csm la	+		worm
11	Angomonas deanei: hypothetical protein AGDE_00889	EPY43034	Eukaryota; Euglenozoa; Kinetoplastida;	lppvk lh csm la	+		trypanosome
12	Anolis carolinensis: PREDICTED: iron-sulfur cluster assembly enzyme ISCU	XP_003229457	Eukaryota; Metazoa; Chordata;	lppvk lh csm la	+		iguania
13	Anopheles aquasalis: putative iron binding protein involved in fe-s cluster formation, partial	JAB00001	Eukaryota; Metazoa; Ecdysozoa;	lppvk lh csm la	+		insect
14	Anoplopoma fimbria: Iron-sulfur cluster assembly enzyme ISCU, mitochondrial precursor	ACQ58345	Eukaryota; Metazoa; Chordata;	lppvk lh csm la	+		sablefish
15	Antonospora locustae: ISCU	AAY27407	Eukaryota; Fungi; Microsporidia;	lppvk lh csm la	+		microsporidian
16	Apis cerana: Iron-sulfur cluster assembly enzyme ISCU	AEY61082	Eukaryota; Metazoa; Ecdysozoa;	lppvk lh csm la	+		honeybee
17	Aplysia californica: PREDICTED: iron-sulfur cluster assembly enzyme ISCU, mitochondrial-like	XP_005096418	Eukaryota; Metazoa; Lophotrochozoa;	lppvk lh csm la	+		sea hare
18	Arabidopsis lyrata subsp. lyrata: hypothetical protein ARALYDRAFT_477433	EFH60558	Eukaryota; Viridiplantae; Streptophyta;	lppvk lh csm la	+		plant
19	Arabidopsis thaliana: At4g04080	ABR46242	Eukaryota; Viridiplantae; Streptophyta;	lppvk lh csm la	+		plant
20	Argas monolakensis: unnamed protein product	CAY10218	Eukaryota; Metazoa; Ecdysozoa;	lppvk lh csm la	+		spider
21	Arthrobotrys oligospora ATCC 24927: hypothetical protein AOL_s00112g84	EGX45895	Eukaryota; Fungi; Dikarya;	lppvk lh csm la	+		fungi
22	Arthroderma benhamiae CBS 112371: hypothetical protein ARB_02637	XP_003011115	Eukaryota; Fungi; Dikarya;	lppvk lh csm la	+		fungi
23	Arthroderma gypseum CBS 118893: iron sulfur cluster assembly protein 1	EFQ98903	Eukaryota; Fungi; Dikarya;	lppvk lh csm la	+		fungi
24	Ascaris suum: Iron-sulfur cluster assembly enzyme ISCU	ADY47438	Eukaryota; Metazoa; Ecdysozoa;	lppvk lh csm la	+		worm
25	Ashbya gossypii ATCC 10895: ACR112Cp	NP_983514	Eukaryota; Fungi; Dikarya;	lppvk lh csm la	+		fungi
26	Aspergillus clavatus NRRL 1: iron-sulfur cofactor synthesis protein (Isu1), putative	EAW10135	Eukaryota; Fungi; Dikarya;	lppvk lh csm la	+		fungi
27	Aspergillus fumigatus Af293: iron-sulfur cofactor synthesis protein (Isu1)	XP_752149	Eukaryota; Fungi; Dikarya;	lppvk lh csm la	+		fungi
28	Aureococcus anophagefferens: hypothetical protein AURANDRAFT_60318	EGB04456	Eukaryota; Stramenopiles; Pelagophyceae;	lppvk lh csm la	+		algae
29	Bathycoccus prasinos: Iron-sulfur cluster assembly enzyme ISCU, mitochondrial precursor	XP_007511837	Eukaryota; Viridiplantae; Chlorophyta;	lppvk lh csm la	+		algae
30	Batrachochytrium dendrobatidis JAM81: hypothetical protein BATDEDRAFT_31079	XP_006675646	Eukaryota; Fungi; Chytridiomycota;	lppvk lh csm la	+		fungi
31	Baudoinia compniacensis UAMH 10762: hypothetical protein BAUCODRAFT_71423	XP_007676974	Eukaryota; Fungi; Dikarya;	lppvk lh csm la	+		fungi
32	Beauveria bassiana ARSEF 2860: iron sulfur cluster assembly protein 1	EJP64760	Eukaryota; Fungi; Dikarya;	lppvk lh csm la	+		fungi
33	Bipolaris maydis ATCC 48331: hypothetical protein COCC4DRAFT_171172	ENI04432	Eukaryota; Fungi; Dikarya;	lppvk lh csm la	+		fungi
34	Bombus impatiens: PREDICTED: iron-sulfur cluster assembly enzyme ISCU, mitochondrial-like	XP_003486474	Eukaryota; Metazoa; Ecdysozoa;	lppvk lh csm la	+		insect
35	Bombyx mori: PREDICTED: iron-sulfur cluster assembly enzyme ISCU, mitochondrial-like	XP_004932696	Eukaryota; Metazoa; Ecdysozoa;	lppvk lh csm la	+		silkworm
36	Bos taurus: iron-sulfur cluster assembly enzyme ISCU, mitochondrial	NP_001069151	Eukaryota; Metazoa; Chordata;	lppvk lh csm la	+		cow
37	Botryotinia fuckeliana B05.10: hypothetical protein BC1G_10579	XP_001550855	Eukaryota; Fungi; Dikarya;	lppvk lh csm la	+		fungi
38	Brachypodium distachyon: PREDICTED: iron-sulfur cluster assembly enzyme ISCU, mitochondrial-like	XP_003569498	Eukaryota; Viridiplantae; Streptophyta;	lppvk lh csm la	+		grass
39	Branchiostoma belcheri tsingtauense: NifU-like protein	AAQ83894	Eukaryota; Metazoa; Chordata;	lppvk lh csm la	+		algae
40	Brugia malayi: NifU-like protein, putative	EDP31577	Eukaryota; Metazoa; Ecdysozoa;	lppvk lh csm la	+		parasitic worm
41	Caenorhabditis elegans: Protein Y45F10D.4	CAA16379	Eukaryota; Metazoa; Ecdysozoa;	lppvk lh csm la	+		worm
42	Caligus rogercresseyi: Iron-sulfur cluster assembly enzyme ISCU, mitochondrial precursor	ACO11126	Eukaryota; Metazoa; Ecdysozoa;	lppvk lh csm la	+		crustacean
43	Callithrix jacchus: iron-sulfur cluster assembly enzyme ISCU, mitochondrial isoform ISCU2 precursor	JAB42528	Eukaryota; Metazoa; Chordata;	lppvk lh csm la	+		primate
44	Callorhinchus milii: iron-sulfur cluster assembly enzyme	NP_001279375	Eukaryota; Metazoa; Chordata;	lppvk lh csm la	+		shark
45	Camelus ferus: iron-sulfur cluster assembly enzyme ISCU, mitochondrial precursor	EPY87339	Eukaryota; Metazoa; Chordata;	lppvk lh csm la	+		camel
46	Camponotus floridanus: Iron-sulfur cluster assembly enzyme ISCU, mitochondrial	EFN69982	Eukaryota; Metazoa; Ecdysozoa;	lppvk lh csm la	+		insect
47	Candida albicans SC5314: likely mitochondrial iron-sulfur cluster assembly scaffold protein	XP_720871	Eukaryota; Fungi; Dikarya;	lppvk lh csm la	+		fungi
48	Canis lupus familiaris: PREDICTED: iron-sulfur cluster assembly enzyme ISCU, mitochondrial isoformX1	XP_534722	Eukaryota; Metazoa; Chordata;	lppvk lh csm la	+		dog
49	Capitella teleta: hypothetical protein CAPTEDRAFT_220819	ELU00200	Eukaryota; Metazoa; Lophotrochozoa;	lppvk lh csm la	+		worm
50	Capra hircus: PREDICTED: iron-sulfur cluster assembly enzyme ISCU, mitochondrial	XP_005691749	Eukaryota; Metazoa; Chordata;	lppvk lh csm la	+		goat
51	Capsella rubella: hypothetical protein CARUB_v10005901mg	EOA17543	Eukaryota; Viridiplantae; Streptophyta;	lppvk lh csm la	+		mustard plant
52	Ceratitis capitata: Iron-sulfur cluster assembly enzyme ISCU, mitochondrial	JAC03033	Eukaryota; Metazoa; Ecdysozoa;	lppvk lh csm la	+		insect
53	Ceratotherium simum simum: PREDICTED: iron-sulfur cluster assembly enzyme ISCU, mitochondrial isoform 1	XP_004429921	Eukaryota; Metazoa; Chordata;	lppvk lh csm la	+		rhinoceros
54	Chaetomium globosum CBS 148.51: hypothetical protein CHGG_08383	EAQ84369	Eukaryota; Fungi; Dikarya;	lppvk lh csm la	+		fungi
55	Chelonia mydas: Iron-sulfur cluster assembly enzyme ISCU	EMP37148	Eukaryota; Metazoa; Chordata;	lppvk lh csm la	+		sea turtle
56	Chinchilla lanigera: PREDICTED: iron-sulfur cluster assembly enzyme ISCU, mitochondrial	XP_005396522	Eukaryota; Metazoa; Chordata;	lppvk lh csm la	+		long-tailed chinchilla
57	Chlamydomonas reinhardtii: iron-sulfur cluster assembly scaffold protein	EDP08966	Eukaryota; Viridiplantae; Chlorophyta;	lppvk lh csm la	+		photosynthetic single cell eukaryote
58	Chlorella variabilis: hypothetical protein CHLNCDRAFT_20689, partial	EFN57984	Eukaryota; Viridiplantae; Chlorophyta;	lppvk lh csm la	+		algae
59	Chondrus crispus: similar to nifU-like iron-sulfur cluster protein Isu1	CDF32759	Eukaryota; Rhodophyta; Florideophyceae;	lppvk lh csm la	+		red seaweed
60	Chrysemys picta bellii: PREDICTED: iron-sulfur cluster assembly enzyme ISCU, mitochondrial	XP_005298628	Eukaryota; Metazoa; Chordata;	lppvk lh csm la	+		turtle
61	Chthoniobacter flavus Ellin428: SUF system FeS assembly protein, NifU family	EDY19168	Bacteria; Verrucomicrobia; Spartobacteria;	kfpqr vk cam la	0		bacterial suf type, aligns poorly
62	Cicer arietinum: PREDICTED: iron-sulfur cluster assembly protein 1-like	XP_004501923	Eukaryota; Viridiplantae; Streptophyta;	lppvk lh csm la	+		chickpea
63	Ciona intestinalis: PREDICTED: iron-sulfur cluster assembly enzyme ISCU, mitochondrial-like	XP_004226209	Eukaryota; Metazoa; Chordata;	lppvk lh csm la	+		worm
64	Claviceps purpurea 20.1: probable ISU1 protein	CCE26583	Eukaryota; Fungi; Dikarya;	lppvk lh csm la	+		fungi
65	Clavispora lusitaniae ATCC 42720: hypothetical protein CLUG_02445	EEQ38319	Eukaryota; Fungi; Dikarya;	lppvk lh csm la	+		fungi
66	Clonorchis sinensis: iron-sulfur cluster assembly enzyme ISCU mitochondrial	GAA51021	Eukaryota; Metazoa; Platyhelminthes;	lppvk lh csm la	+		worm
67	Clostridium bolteae 90B3: hypothetical protein HMPREF1089_02070	ENZ43853	Bacteria; Firmicutes; Clostridia;	lepey mh cam ma	0		bacterial suf type, aligns poorly
68	Coccidioides immitis RS: hypothetical protein CIMG_04245	XP_001244804	Eukaryota; Fungi; Dikarya;	lppvk lh csm la	+		fungi
69	Coccomyxa subellipsoidea C-169: Fe-S scaffold protein 1	XP_005649671	Eukaryota; Viridiplantae; Chlorophyta;	lppvk lh csm la	+		algae
70	Colletotrichum gloeosporioides Cg-14: FeS cluster assembly scaffold IscU	EQB52776	Eukaryota; Fungi; Dikarya;	lppvk lh csm la	+		fungi
71	Columba livia: Iron-sulfur cluster assembly enzyme ISCU, mitochondrial, partial	EMC86876	Eukaryota; Metazoa; Chordata;	lppvk lh csm la	+		pigeon
72	Condylura cristata: PREDICTED: iron-sulfur cluster assembly enzyme ISCU, mitochondrial	XP_004691020	Eukaryota; Metazoa; Chordata;	lppvk lh csm la	+		insect
73	Coniophora puteana RWD-64-598 SS2: FeS cluster assembly scaffold IscU	XP_007767960	Eukaryota; Fungi; Dikarya;	lppvk lh csm la	+		fungi
74	Coniosporium apollinis CBS 100218: hypothetical protein W97_07451	EON67954	Eukaryota; Fungi; Dikarya;	lppvk lh csm la	+		fungi
75	Coprinopsis cinerea okayama7#130: iron sulfur cluster assembly protein 1	XP_001837358	Eukaryota; Fungi; Dikarya;	lppvk lh csm la	+		fungi
76	Cordyceps militaris CM01: iron sulfur cluster assembly protein 1	XP_006670926	Eukaryota; Fungi; Dikarya;	lppvk lh csm la	+		fungi
77	Coregonus maraena: iron-sulfur cluster scaffold protein b	CCF23319	Eukaryota; Metazoa; Chordata;	lppvk lh csm la	+		whitefish
78	Corethrella appendiculata: putative iron binding protein involved in fe-s cluster formation, partial	JAB56280	Eukaryota; Metazoa; Ecdysozoa;	lppvk lh csm la	+		insect
79	Crassostrea gigas: Iron-sulfur cluster assembly enzyme ISCU, mitochondrial	EKC40628	Eukaryota; Metazoa; Lophotrochozoa;	lppvk lh csm la	+		oyster
80	Cricetulus griseus: Iron-sulfur cluster assembly enzyme ISCU, mitochondrial	XP_007607201	Eukaryota; Metazoa; Chordata;	lppvk lh csm la	+		hamster
81	Crotalus adamanteus: putative IscU iron-sulfur cluster scaffold variant	AFJ50389	Eukaryota; Metazoa; Chordata;	lppvk lh csm la	+		rattlesnake
82	Cucumis sativus: PREDICTED: iron-sulfur cluster assembly protein 1-like	XP_004167265	Eukaryota; Viridiplantae; Streptophyta;	lppvk lh csm la	+		cucumber
83	Cyanidioschyzon merolae strain 10D: similar to nifU-like iron-sulfur cluster protein Isu1	BAM82528	Eukaryota; Rhodophyta; Bangiophyceae;	lppvk lh csm la	+		red algae
84	Dacryopinax sp. DJM-731 SS1: hypothetical protein DACRYDRAFT_25018	EJT97654	Eukaryota; Fungi; Dikarya;	lppvk lh csm la	+		fungi
85	Dactylellina haptotyla CBS 200.50: hypothetical protein H072_8433	EPS37888	Eukaryota; Fungi; Dikarya;	lppvk lh csm la	+		fungi
86	Danaus plexippus: hypothetical protein KGM_22314	EHJ74559	Eukaryota; Metazoa; Ecdysozoa;	lppvk lh csm la	+		insect
87	Danio rerio: iron-sulfur cluster assembly enzyme	NP_001003632	Eukaryota; Metazoa; Chordata;	lppvk lh csm la	+		fish
88	Daphnia pulex: hypothetical protein DAPPUDRAFT_300869	EFX69636	Eukaryota; Metazoa; Ecdysozoa;	lppvk lh csm la	+		water flea
89	Dasypus novemcinctus: PREDICTED: iron-sulfur cluster assembly enzyme ISCU, mitochondrial isoform 1	XP_004470231	Eukaryota; Metazoa; Chordata;	lppvk lh csm la	+		armadillo
90	Debaryomyces hansenii CBS767: DEHA2G23958p	CAG91094	Eukaryota; Fungi; Dikarya;	lppvk lh csm la	+		fungi
91	Dekkera bruxellensis AWRI1499: iron sulfur cluster assembly protein mitochondrial precursor	EIF46609	Eukaryota; Fungi; Dikarya;	lppvk lh csm la	+		fungi
92	Dendroctonus ponderosae: hypothetical protein D910_03241	ERL85826	Eukaryota; Metazoa; Ecdysozoa;	lppvk lh csm la	+		insect
93	Diaphorina citri: nitrogen fixation-like protein	ABG74728	Eukaryota; Metazoa; Ecdysozoa;	lppvk lh csm la	+		insect
94	Dichomitus squalens LYAD-421 SS1: FeS cluster assembly scaffold IscU	XP_007364220	Eukaryota; Fungi; Dikarya;	lppvk lh csm la	+		fungi
95	Dictyostelium discoideum AX4: hypothetical protein DDB_G0283003	XP_639309	Eukaryota; Amoebozoa; Mycetozoa;	lppvk mh csm la	+		slime mold
96	Dothistroma septosporum NZE10: hypothetical protein DOTSEDRAFT_64031	EME42165	Eukaryota; Fungi; Dikarya;	lppvk mh csm la	+		fungi
97	Drosophila melanogaster: CG9836	AAF54298	Eukaryota; Metazoa; Ecdysozoa;	lppvk lh csm la	+		fly
98	Echinops telfairi: PREDICTED: iron-sulfur cluster assembly enzyme ISCU, mitochondrial	XP_004709693	Eukaryota; Metazoa; Chordata;	lppvk lh csm la	+		hedgehog
99	Ectocarpus siliculosus: conserved unknown protein IscU	CBJ33232	Eukaryota; Stramenopiles; PX clade;	lppvk lh csm la	+		brown algae
100	Edhazardia aedis USNM 41457: iron sulfur cluster assembly protein 1	EJW01541	Eukaryota; Fungi; Microsporidia;	lppvk lh csm la	+		microsporidia
101	Emiliania huxleyi CCMP1516: iron-sulfur cluster assembly enzyme, partial	EOD05233	Eukaryota; Haptophyceae; Isochrysidales;	lppvk lh csm la	+		photosynthetic plankton
102	Encephalitozoon intestinalis ATCC 50506: FeS cluster assembly scaffold IscU	ADM10901	Eukaryota; Fungi; Microsporidia;	lppik lh csm la	+		microsporidium
103	Endocarpon pusillum Z07020: Iron sulfur cluster assembly protein 1	XP_007800515	Eukaryota; Fungi; Dikarya;	lppvk lh csm la	+		fungi
104	Equus caballus: PREDICTED: iron-sulfur cluster assembly enzyme ISCU, mitochondrial isoform X2	XP_005612563	Eukaryota; Metazoa; Chordata;	lppvk lh csm la	+		horse
105	Eremothecium cymbalariae DBVPG#7215: Hypothetical protein Ecym_8332	AET41610	Eukaryota; Fungi; Dikarya;	lppvk lh csm la	+		fungi
106	Esox lucius: Iron-sulfur cluster assembly enzyme ISCU, mitochondrial precursor	ACO13671	Eukaryota; Metazoa; Chordata;	lppvk lh csm la	+		pike
107	Eutypa lata UCREL1: putative iron sulfur cluster assembly protein 1 protein	XP_007792014	Eukaryota; Fungi; Dikarya;	lppvk lh csm la	+		fungi
108	Exophiala dermatitidis NIH/UT8656: nitrogen fixation protein NifU and like protein	EHY58748	Eukaryota; Fungi; Dikarya;	lppvk lh csm la	+		fungi
109	Falco peregrinus: PREDICTED: iron-sulfur cluster assembly enzyme ISCU, mitochondrial	XP_005237655	Eukaryota; Metazoa; Chordata;	lppvk lh csm la	+		falcon
110	Fibroporia radiculosa: predicted protein	CCM03386	Eukaryota; Fungi; Dikarya;	lppvk lh csm la	+		fungi
111	Ficedula albicollis: PREDICTED: iron-sulfur cluster assembly enzyme ISCU, mitochondrial	XP_005055106	Eukaryota; Metazoa; Chordata;	lppvk lh csm la	+		collared flycatcher
112	Firmicutes bacterium CAG:631: sUF system FeS assembly protein NifU family	WP_022051317	Bacteria; Firmicutes;	kqanr ik cam ig	0		bacterial, suf type, aligns poorly
113	Fomitopsis pinicola FP-58527 SS1: hypothetical protein FOMPIDRAFT_1022708	EPT02819	Eukaryota; Fungi; Dikarya;	lppvk rh csm la	+		fungi
114	Fragaria vesca subsp. vesca: PREDICTED: iron-sulfur cluster assembly protein 1-like	XP_004298947	Eukaryota; Viridiplantae; Streptophyta;	lppvk lh csm la	+		strawberry
115	Fusarium fujikuroi IMI 58289: probable ISU1 protein	CCT69029	Eukaryota; Fungi; Dikarya;	lppvk lh csm la	+		fungi
116	Fusarium oxysporum f. sp. cubense race 1: Iron sulfur cluster assembly protein 1, mitochondrial	ENH74556	Eukaryota; Fungi; Dikarya;	lppvk lh csm la	+		fungi
117	Galdieria sulphuraria: nitrogen fixation protein NifU	XP_005705575	Eukaryota; Rhodophyta; Bangiophyceae;	lppvk lh csm la	+		algae
118	Gallus gallus: PREDICTED: iron-sulfur cluster assembly enzyme ISCU, mitochondrial	XP_003642230	Eukaryota; Metazoa; Chordata;	lppvk lh csm la	+		chicken
119	gamma proteobacterium HIMB30: SUF system FeS assembly protein	WP_010548971	Bacteria; Proteobacteria; Gammaproteobacteria	vnpsr vk cvm la	0		bacterial, suf type, aligns poorly
120	Genlisea aurea: hypothetical protein M569_16583, partial	EPS58232	Eukaryota; Viridiplantae; Streptophyta;	lppvk lh csm la	+		carnivorous plant
121	Geospiza fortis: PREDICTED: iron-sulfur cluster assembly enzyme ISCU, mitochondrial	XP_005424159	Eukaryota; Metazoa; Chordata;	lppvk lh csm la	+		finch
122	Glarea lozoyensis ATCC 20868: SufE/NifU	XP_008078405	Eukaryota; Fungi; Dikarya;	lppvk lh csm la	+		fungi
123	Gloeophyllum trabeum ATCC 11539: FeS cluster assembly scaffold IscU, partial	XP_007861629	Eukaryota; Fungi; Dikarya;	lppvk lh csm la	+		fungi
124	Glossina morsitans morsitans: mitochondrial NifU-like N-terminal domain-containing protein precursor	ADD19376	Eukaryota; Metazoa; Ecdysozoa;	lppvk lh csm la	+		insecta
125	Glycine max: PREDICTED: iron-sulfur cluster assembly protein 1	XP_003525426	Eukaryota; Viridiplantae; Streptophyta;	lppvk lh csm la	+		soybean, plant
126	Gorilla gorilla gorilla: PREDICTED: iron-sulfur cluster assembly enzyme ISCU, mitochondrial isoform 1	XP_004053882	Eukaryota; Metazoa; Chordata;	lppvk lh csm la	+		gorilla
127	Grosmannia clavigera kw1407: iron sulfur cluster assembly protein mitochondrial precursor	EFX05709	Eukaryota; Fungi; Dikarya;	lppvk lh csm la	+		fungi
128	Guillardia theta CCMP2712: hypothetical protein GUITHDRAFT_92053	XP_005840467	Eukaryota; Cryptophyta; Pyrenomonadales;	lppvk lh csm la	+		algae
129	Haplochromis burtoni: PREDICTED: iron-sulfur cluster assembly enzyme ISCU, mitochondrial-like	XP_005934736	Eukaryota; Metazoa; Chordata;	lppvk lh csm la	+		fish
130	Harpegnathos saltator: Iron-sulfur cluster assembly enzyme ISCU, mitochondrial	EFN83732	Eukaryota; Metazoa; Ecdysozoa;	lppvk mh csm la	+		insect
131	Heterocephalus glaber: PREDICTED: iron-sulfur cluster assembly enzyme ISCU, mitochondrial	XP_004843682	Eukaryota; Metazoa; Chordata;	lppvk mh csm la	+		naked mole rat
132	Hevea brasiliensis: iron-sulfur cluster scaffold protein	ADM67612	Eukaryota; Viridiplantae; Streptophyta;	lppvk mh csm la	+		plant
133	Holospora undulata HU1: iron-sulfur cluster assembly enzyme ISCU, mitochondrial	ETZ05041	Bacteria; Proteobacteria; Alphaproteobacteria;	lppvk lh csm la	+	*	rickettsiales, symbiont of paramecium
134	Homo sapiens: iron-sulfur cluster assembly enzyme ISCU, mitochondrial isoform ISCU2 precursor	NP_998760	Eukaryota; Metazoa; Chordata;	lppvk lh csm la	+		human
135	Hydra vulgaris: PREDICTED: iron-sulfur cluster assembly enzyme ISCU, mitochondrial-like, partial	XP_002165278	Eukaryota; Metazoa; Cnidaria;	lppvk lh csm la	+		fresh water polyp
136	Hymenochirus curtipes: putative iron-sulfur cluster protein	AEQ17931	Eukaryota; Metazoa; Chordata;	lppvk lh csm la	+		frog
137	Ichthyophthirius multifiliis: iron sulfur cluster assembly protein mitochondrial precursor, putative	XP_004039730	Eukaryota; Alveolata; Ciliophora;	lppvk lh csm la	+		protozoan
138	Ictidomys tridecemlineatus: PREDICTED: iron-sulfur cluster assembly enzyme ISCU, mitochondrial	XP_005340155	Eukaryota; Metazoa; Chordata;	lppvk lh csm la	+		squirrel
139	Ixodes ricinus: Putative iron binding protein involved in fe-s cluster formation	JAA71847	Eukaryota; Metazoa; Ecdysozoa;	lppvk lh csm la	+		spider
140	Jaculus jaculus: PREDICTED: iron-sulfur cluster assembly enzyme ISCU, mitochondrial	XP_004664158	Eukaryota; Metazoa; Chordata;	lppvk lh csm la	+		rodent
141	Komagataella pastoris GS115: Conserved protein of the mitochondrial matrix, performs a scaffolding function during assembly of ir	CAY68750	Eukaryota; Fungi; Dikarya;	lppvklhc smla	+		fungi
142	Laccaria bicolor S238N-H82: predicted protein	EDR12505	Eukaryota; Fungi; Dikarya;	lppvk lh csm la	+		fungi
143	Lachancea thermotolerans CBS 6340: KLTH0D10560p	CAR22731	Eukaryota; Fungi; Dikarya;	lppvk lh csm la	+		fungi
144	Lactobacillus salivarius cp400: IscU protein	CDK34256	Bacteria; Firmicutes; Bacilli;	qfpar ik cam ls	0		bacterial, suf type, aligns poorly
145	Leishmania braziliensis MHOM/BR/75/M2904: putative iron-sulfur cluster assembly protein	XP_001568462	Eukaryota; Euglenozoa; Kinetoplastida;	lppvk lh csm la	+		trypanosome
146	Lepeophtheirus salmonis: Iron-sulfur cluster assembly enzyme ISCU, mitochondrial	ADD37980	Eukaryota; Metazoa; Ecdysozoa;	lppvk lh csm la	+		crustacean
147	Leptosphaeria maculans JN3: similar to iron sulfur cluster assembly protein 1	XP_003845505	Eukaryota; Fungi; Dikarya;	lppvk lh csm la	+		fungi
148	Leucobacter salsicius: nitrogen fixation protein NifU	WP_017791853	Bacteria; Actinobacteria; Actinobacteridae;	kyvmr vk cam lg	0		bacterial, suf type, aligns poorly
149	Loa loa: hypothetical protein LOAG_08352	XP_003143934	Eukaryota; Metazoa; Ecdysozoa;	lppvk lh csm la	+		parasitic worm
150	Lodderomyces elongisporus NRRL YB-4239: iron sulfur cluster assembly protein 1, mitochondrial precursor	EDK46895	Eukaryota; Fungi; Dikarya;	lppvk lh csm la	+		fungi
151	Lotus japonicus: unknown	AFK41996	Eukaryota; Viridiplantae; Streptophyta;	lppvk lh csm la	+		plant
152	Loxodonta africana: PREDICTED: iron-sulfur cluster assembly enzyme ISCU, mitochondrial-like isoform 2	XP_003419294	Eukaryota; Metazoa; Chordata;	lppvk lh csm la	+		elephant
153	Macaca fascicularis: PREDICTED: iron-sulfur cluster assembly enzyme ISCU, mitochondrial isoform X2	XP_005572205	Eukaryota; Metazoa; Chordata;	lppvk lh csm la	+		primate
154	Macrophomina phaseolina MS6: Cupin 2 conserved barrel	EKG21232	Eukaryota; Fungi; Dikarya;	lppvk lh csm la	+		fungi
155	Magnaporthe oryzae 70-15: iron sulfur cluster assembly protein 2	EHA54246	Eukaryota; Fungi; Dikarya;	lppvk lh csm la	+		fungi
156	Malassezia globosa CBS 7966: hypothetical protein MGL_3024	XP_001730038	Eukaryota; Fungi; Dikarya;	lppvk lh csm la	+		fungi
157	Marine Group II euryarchaeote SCGC AB-629-J06: hypothetical protein	WP_018035868	Archaea; Euryarchaeota; Marine Group II	lppvk lh csm la	+	*	marine group II euryarchaeote, no more known
158	Marssonina brunnea f. sp. 'multigermtubi' MB_m1: putative iron sulfur cluster assembly protein 1	EKD16602	Eukaryota; Fungi; Dikarya;	lppvk lh csm la	+		fungi
159	Maylandia zebra: PREDICTED: iron-sulfur cluster assembly enzyme ISCU, mitochondrial-like	XP_004544635	Eukaryota; Metazoa; Chordata;	lppvk lh csm la	+		zebra
160	Medicago truncatula: Iron sulfur cluster assembly protein	XP_003601257	Eukaryota; Viridiplantae; Streptophyta;	lppvk lh csm la	+		plant
161	Megachile rotundata: PREDICTED: iron-sulfur cluster assembly enzyme ISCU, mitochondrial-like	XP_003706073	Eukaryota; Metazoa; Ecdysozoa;	lppvk lh csm la	+		insecta
162	Melampsora larici-populina 98AG31: hypothetical protein MELLADRAFT_50916	XP_007417981	Eukaryota; Fungi; Dikarya;	lppvk lh csm la	+		fungi
163	Melopsittacus undulatus: PREDICTED: iron-sulfur cluster assembly enzyme ISCU, mitochondrial, partial	XP_005145273	Eukaryota; Metazoa; Chordata;	lppvk lh csm la	+		parakeet
164	Mesocricetus auratus: PREDICTED: iron-sulfur cluster assembly enzyme ISCU, mitochondrial	XP_005078985	Eukaryota; Metazoa; Chordata;	lppvk lh csm la	+		hamster
165	Metarhizium acridum CQMa 102: iron sulfur cluster assembly protein	EFY86154	Eukaryota; Fungi; Dikarya;	snpls vh csm la	0		fungi
166	Metarhizium anisopliae ARSEF 23: iron sulfur cluster assembly protein 1	XP_007819552	Eukaryota; Fungi; Dikarya;	lppvk lh csm la	+		fungi
167	Metaseiulus occidentalis: PREDICTED: iron-sulfur cluster assembly enzyme ISCU, mitochondrial-like	XP_003746498	Eukaryota; Metazoa; Ecdysozoa;	lppvk lh csm la	+		mite
168	Meyerozyma guilliermondii ATCC 6260: iron sulfur cluster assembly protein 1, mitochondrial precursor	EDK39967	Eukaryota; Fungi; Dikarya;	lppvk lh csm la	+		fungi
169	Microbacterium laevaniformans OR221: SUF system FeS assembly protein, NifU family	EIC07328	Bacteria; Actinobacteria; Actinobacteridae;	kfsar vk cam la	0		bacterial, suf type, aligns poorly
170	Micromonas pusilla CCMP1545: iron-sulfur cofactor synthesis protein	EEH60552	Eukaryota; Viridiplantae; Chlorophyta;	lppvk lh csm la	+		plant
171	Microtus ochrogaster: PREDICTED: iron-sulfur cluster assembly enzyme ISCU, mitochondrial	XP_005344303	Eukaryota; Metazoa; Chordata;	lppvk lh csm la	+		prairie vole
172	Millerozyma farinosa CBS 7064: Piso0_002742	CCE82048	Eukaryota; Fungi; Dikarya;	lppvk lh csm la	+		fungi
173	Mixia osmundae IAM 14324: hypothetical protein E5Q_00023	GAA93383	Eukaryota; Fungi; Dikarya;	lppvk lh csm la	+		fungi
174	Monosiga brevicollis MX1: hypothetical protein	XP_001750626	Eukaryota; Choanoflagellida; Codonosigidae;	lppvk lh csm la	+		flagellate
175	Mucor circinelloides f. circinelloides 1006PhL: iron sulfur cluster assembly protein 1, mitochondrial	EPB85927	Eukaryota; Fungi; Fungi incertae sedis;	lppvk lh csm la	+		mucor
176	Mus musculus: mCG1045461	EDL33321	Eukaryota; Metazoa; Chordata;	lppvk lh csm la	+		mouse
177	Mustela putorius furo: PREDICTED: iron-sulfur cluster assembly enzyme ISCU, mitochondrial	XP_004825000	Eukaryota; Metazoa; Chordata;	lppvk lh csm la	+		feret
178	Myceliophthora thermophila ATCC 42464: hypothetical protein MYCTH_2307775	AEO59443	Eukaryota; Fungi; Dikarya;	lppvk lh csm la			fungi
179	Myotis brandtii: Iron-sulfur cluster assembly enzyme ISCU, mitochondrial	XP_005869747	Eukaryota; Metazoa; Chordata;	lppvk lh csm la	+		bat
180	Nasonia vitripennis: PREDICTED: iron-sulfur cluster assembly enzyme ISCU, mitochondrial-like	XP_008215757	Eukaryota; Metazoa; Ecdysozoa;	lppvk lh csm la	+		wasp
181	Naumovozyma castellii CBS 4309: hypothetical protein NCAS_0C01540	CCC69144	Eukaryota; Fungi; Dikarya;	lppvk lh csm la	+		fungi
182	Nectria haematococca mpVI 77-13-4: hypothetical protein NECHADRAFT_62259	EEU39215	Eukaryota; Fungi; Dikarya;	lppvk lh csm la	+		fungi
183	Nematostella vectensis: predicted protein	EDO38719	Eukaryota; Metazoa; Cnidaria;	lppvk lh csm la	+		sea anemone
184	Neofusicoccum parvum UCRNP2: putative iron sulfur cluster assembly protein 1 protein	XP_007586352	Eukaryota; Fungi; Dikarya;	lppvk lh csm la	+		fungi
185	Neorickettsia risticii str. Illinois: FeS cluster assembly scaffold IscU	ACT69285	Bacteria; Proteobacteria; Alphaproteobacteria;	lppik mh csm la	+	*	rickettsiales, causative agent of Potomac horse fever
186	Neorickettsia sennetsu str. Miyayama: FeS cluster assembly scaffold IscU	ABD45828	Bacteria; Proteobacteria; Alphaproteobacteria;	lppik mh csm la	+	*	rickettsiales, agent of human ehrlichosis
187	Neosartorya fischeri NRRL 181: iron-sulfur cofactor synthesis protein (Isu1), putative	EAW25452	Eukaryota; Fungi; Dikarya;	lppvk lh csm la	+		fungi
188	Neurospora tetrasperma FGSC 2509: iron sulfur cluster assembly protein 1, mitochondrial precursor	EGZ68851	Eukaryota; Fungi; Dikarya;	lppvk lh csm la	+		fungi
189	Nomascus leucogenys: PREDICTED: iron-sulfur cluster assembly enzyme ISCU, mitochondrial isoform 1	XP_003270035	Eukaryota; Metazoa; Chordata;	lppvk lh csm la	+		gibbon
190	Nosema apis BRL 01: cluster assembly scaffold protein	EQB61902	Eukaryota; Fungi; Microsporidia;	lppik lh csm la	+		microsporidium
191	Octodon degus: PREDICTED: iron-sulfur cluster assembly enzyme ISCU, mitochondrial	XP_004636337	Eukaryota; Metazoa; Chordata;	lppik mh csm la	+		rodent
192	Odobenus rosmarus divergens: PREDICTED: iron-sulfur cluster assembly enzyme ISCU, mitochondrial	XP_004416218	Eukaryota; Metazoa; Chordata;	lppvk lh csm la	+		walrus
193	Oncorhynchus mykiss: iron-sulfur cluster scaffold homolog a	NP_001165332	Eukaryota; Metazoa; Chordata;	lppik mh csm la	+		trout
194	Ophiocordyceps sinensis CO18: iron sulfur cluster assembly protein 1	EQK98859	Eukaryota; Fungi; Dikarya;	lppvk lh csm la	+		fungi
195	Ophiostoma piceae UAMH 11346: iron sulfur cluster assembly protein 1	EPE05393	Eukaryota; Fungi; Dikarya;	lppvk mh csm la	+		fungi
196	Orcinus orca: PREDICTED: iron-sulfur cluster assembly enzyme ISCU, mitochondrial isoform 1	XP_004281418	Eukaryota; Metazoa; Chordata;	lppvk lh csm la	+		whale
197	Oreochromis niloticus: PREDICTED: iron-sulfur cluster assembly enzyme ISCU, mitochondrial-like	XP_003453898	Eukaryota; Metazoa; Chordata;	lppvk lh csm la	+		tilapia
198	Orientia tsutsugamushi str. Ikeda: NifU protein homolog	YP_001937264	Bacteria; Proteobacteria; Alphaproteobacteria;	llpik mh csm la	+	*	ricketasiales, mite borne, obligate intracellular pathogen
199	Ornithorhynchus anatinus: PREDICTED: iron-sulfur cluster assembly enzyme ISCU, mitochondrial-like	XP_007665724	Eukaryota; Metazoa; Chordata;	lppvk lh csm la	+		platypus
200	Oryza sativa Indica Group: hypothetical protein OsI_03151	EAY75264	Eukaryota; Viridiplantae; Streptophyta;	lppvk lh csm la	+		rice
201	Oryzias latipes: PREDICTED: iron-sulfur cluster assembly enzyme ISCU, mitochondrial-like	XP_004072428	Eukaryota; Metazoa; Chordata;	lppvk lh csm la	+		fish
202	Osmerus mordax: NifU-like N-terminal domain-containing protein, mitochondrial precursor	ACO09999	Eukaryota; Metazoa; Chordata;	lppvk lh csm la	+		rainbow smelt
203	Ostreococcus lucimarinus CCE9901: predicted protein	ABO94140	Eukaryota; Viridiplantae; Chlorophyta;	lppvk lh csm la	+		algae
204	Otolemur garnettii: PREDICTED: iron-sulfur cluster assembly enzyme ISCU, mitochondrial isoform 1	XP_003789929	Eukaryota; Metazoa; Chordata;	lppvk lh csm la	+		lemur
205	Oxytricha trifallax: hypothetical protein OXYTRI_19481	EJY82901	Eukaryota; Alveolata; Ciliophora;	lppvk lh csm la	+		protozoan
206	Pan paniscus: PREDICTED: iron-sulfur cluster assembly enzyme ISCU, mitochondrial isoform 1	XP_003832574	Eukaryota; Metazoa; Chordata;	lppvk lh csm la	+		chimp
207	Pan troglodytes: iron-sulfur cluster scaffold homolog	JAA42236	Eukaryota; Metazoa; Chordata;	lppvk lh csm la	+		chimpanzee
208	Papilio polytes: nitrogen fixation protein nifu	BAM19305	Eukaryota; Metazoa; Ecdysozoa;	lppvk lh csm la	+		butterfly
209	Papio anubis: PREDICTED: iron-sulfur cluster assembly enzyme ISCU, mitochondrial	XP_003907159	Eukaryota; Metazoa; Chordata;	lppvk lh csm la	+		baboon
210	Paracoccidioides brasiliensis Pb03: iron sulfur cluster assembly protein	EEH22499	Eukaryota; Fungi; Dikarya;	lppvk lh csm la	+		paracoccidioides
211	Paramecium tetraurelia strain d4-2: hypothetical protein	XP_001443310	Eukaryota; Alveolata; Ciliophora;	lppvk lh csm la	+		paramecium
212	Pediculus humanus corporis: nitrogen fixation protein nifu, putative	XP_002425565	Eukaryota; Metazoa; Ecdysozoa;	lppvk lh csm la	+		human body louse
213	Penicillium chrysogenum Wisconsin 54-1255: Pc22g17800	CAP99068	Eukaryota; Fungi; Dikarya;	lppvk lh csm la	+		penicillium
214	Phaeodactylum tricornutum CCAP 1055/1: iron-sulphur assembly protein isc	EEC47059	Eukaryota; Stramenopiles; Bacillariophyta;	lppvk lh csm la	+		diatom
215	Phaeosphaeria nodorum SN15: hypothetical protein SNOG_02892	EAT89623	Eukaryota; Fungi; Dikarya;	lppvk lh csm la	+		fungi
216	Phanerochaete carnosa HHB-10118-sp: hypothetical protein PHACADRAFT_249906	XP_007391987	Eukaryota; Fungi; Dikarya;	lppvk lh csm la	+		fungi
217	Physcomitrella patens: predicted protein	EDQ75334	Eukaryota; Viridiplantae; Streptophyta;	lppvk lh csm la	+		moss
218	Phytophthora infestans T30-4: iron sulfur cluster assembly protein 1, mitochondrial precursor	EEY63986	Eukaryota; Stramenopiles; Oomycetes;	lppvk lh csm la	+		potato blight
219	Picea sitchensis: unknown	ABK23453	Eukaryota; Viridiplantae; Streptophyta;	lppvk lh csm la	+		spruce
220	Piriformospora indica DSM 11827: probable ISU1 protein	CCA69479	Eukaryota; Fungi; Dikarya;	lppvk lh csm la	+		fungi
221	Pneumocystis jirovecii: unnamed protein product	CCJ30548	Eukaryota; Fungi; Dikarya;	lppvk lh csm la	+		pneumocystis, protozoan pathogen
222	Podospora anserina S mat+: hypothetical protein	XP_001903597	Eukaryota; Fungi; Dikarya;	lppvk lh csm la	+		podospora
223	Polysphondylium pallidum PN500: hypothetical protein PPL_09205	EFA78553	Eukaryota; Amoebozoa; Mycetozoa;	lppvk mh csm la	+		slime mould
224	Pongo abelii: PREDICTED: iron-sulfur cluster assembly enzyme ISCU, mitochondrial isoform 1	XP_002823747	Eukaryota; Metazoa; Chordata;	lppvk lh csm la	+		orangutan
225	Populus trichocarpa: iron-sulfur cluster assembly complex family protein	XP_002318652	Eukaryota; Viridiplantae; Streptophyta;	lppvk lh csm la	+		black cottonwood
226	Propionibacterium acidipropionici ATCC 4875: NifU family SUF system FeS assembly protein	YP_006981385	Bacteria; Actinobacteria; Actinobacteridae;	klmar vk cam lg	0		bacterial, suf type, aligns poorly
227	Propionimicrobium lymphophilum ACS-093-V-SCH5: NifU family SUF system FeS assembly protein	YP_006981385	Bacteria; Actinobacteria; Actinobacteridae;	qfpgr vk cam g	0		bacterial, suf type, aligns poorly
228	Prunus persica: hypothetical protein PRUPE_ppa012356mg	EMJ10884	Eukaryota; Viridiplantae; Streptophyta;	lppvk lh csm la	+		prune
229	Pseudocercospora fijiensis CIRAD86: hypothetical protein MYCFIDRAFT_204296	XP_007928588	Eukaryota; Fungi; Dikarya;	lppvk lh csm la	+		fungi
230	Pseudogymnoascus destructans 20631-21: hypothetical protein GMDG_02492	ELR07312	Eukaryota; Fungi; Dikarya;	lppvk lh csm la	+		fungi
231	Pseudopodoces humilis: PREDICTED: iron-sulfur cluster assembly enzyme ISCU, mitochondrial	XP_005524359	Eukaryota; Metazoa; Chordata;	lppvk lh csm la	+		bird
232	Pseudozyma antarctica T-34: iron binding protein involved in Fe-S cluster formation	GAC77178	Eukaryota; Fungi; Dikarya;	lppvk lh csm la	+		fungi
233	Pundamilia nyererei: PREDICTED: iron-sulfur cluster assembly enzyme ISCU, mitochondrial-like	XP_005735282	Eukaryota; Metazoa; Chordata;	lppvk lh csm la	+		cichlid
234	Pyrenophora teres f. teres 0-1: hypothetical protein PTT_07956	EFQ94390	Eukaryota; Fungi; Dikarya;	lppvk lh csm la	+		fungi
235	Pyrenophora tritici-repentis Pt-1C-BFP: iron sulfur cluster assembly protein 1, mitochondrial precursor	EDU44735	Eukaryota; Fungi; Dikarya;	lppvk lh csm la	+		fungi
236	Rattus norvegicus: iron-sulfur cluster assembly enzyme ISCU, mitochondrial	NP_001099406	Eukaryota; Metazoa; Chordata;	lppvk lh csm la	+		rat
237	Rhipicephalus pulchellus: Putative iron binding protein involved in fe-s cluster formation	JAA57885	Eukaryota; Metazoa; Ecdysozoa;	lppvk lh csm la	+		spider
238	Rhizoctonia solani AG-1 IB: Iron sulfur cluster assembly protein 1	CCO34857	Eukaryota; Fungi; Dikarya;	lppvk lh csm la	+		fungi
239	Rhizopus delemar RA 99-880: iron sulfur cluster assembly protein 1	EIE90597	Eukaryota; Fungi; Fungi incertae sedis;	lppvk lh csm la	+		fungi
240	Saccharomyces cerevisiae S288c: Isu1p	NP_015190	Eukaryota; Fungi; Dikarya;	lppvk lh csm la	+		Saccharomyces cerevisiae
241	Saccoglossus kowalevskii: PREDICTED: iron-sulfur cluster assembly enzyme ISCU, mitochondrial-like	XP_002739643	Eukaryota; Metazoa; Hemichordata;	lppvk lh csm la	+		acorn worm
242	Saimiri boliviensis boliviensis: PREDICTED: iron-sulfur cluster assembly enzyme ISCU, mitochondrial isoform 1	XP_003932340	Eukaryota; Metazoa; Chordata;	lppvk lh csm la	+		monkey
243	Salmo salar: iron-sulfur cluster assembly enzyme ISCU mitochondrial precursor	AGH92629	Eukaryota; Metazoa; Chordata;	lppvk lh csm la	+		salmon
244	Salpingoeca rosetta: iron-sulfur cluster assembly enzyme ISCU	XP_004993281	Eukaryota; Choanoflagellida; Salpingoecidae;	lppvk lh csm la	+		flagellate
245	Saprolegnia diclina VS20: iron-sulfur cluster assembly enzyme ISCU, mitochondrial	EQC38268	Eukaryota; Stramenopiles; Oomycetes;	lppvk lh csm la	+		fresh water mold
246	Sawyeria marylandensis: IscU, partial	ABU95429	Eukaryota; Heterolobosea; Psalteriomonadidae;	lppvk lh csm la	+		amoeba
247	Scheffersomyces stipitis CBS 6054: Iron sulfur cluster assembly protein 1, mitochondrial precursor (Iron sulfur cluster scaffold protein 1)	ABN65049	Eukaryota; Fungi; Dikarya;	lppvk lh csm la	+		fungi
248	Schistosoma mansoni: nitrogen fixation protein nifu	CCD83116	Eukaryota; Metazoa; Platyhelminthes;	lppvk lh csm la	+		human parasite
249	Schizophyllum commune H4-8: hypothetical protein SCHCODRAFT_72304	EFJ01892	Eukaryota; Fungi; Dikarya;	lppvk lh csm la	+		fungi
250	Schizosaccharomyces pombe: mitochondrial iron-sulfur cluster assembly scaffold protein Isu1	CAB61462	Eukaryota; Fungi; Dikarya;	lppvk lh csm la	+		fission yeast
251	Sclerotinia sclerotiorum 1980 UF-70: hypothetical protein SS1G_10527	EDN94653	Eukaryota; Fungi; Dikarya;	lppvk lh csm la	+		fungi
252	Selaginella moellendorffii: hypothetical protein SELMODRAFT_6710	EFJ08217	Eukaryota; Viridiplantae; Streptophyta;	lppvk lh csm la	+		ancient plant
253	Setaria italica: PREDICTED: iron-sulfur cluster assembly protein 1-like	XP_004969378	Eukaryota; Viridiplantae; Streptophyta;	lppvk lh csm la	+		millet
254	Setosphaeria turcica Et28A: hypothetical protein SETTUDRAFT_91320	XP_008027431	Eukaryota; Fungi; Dikarya;	lppvk lh csm la	+		fungi
255	Solanum lycopersicum: PREDICTED: iron-sulfur cluster assembly protein 1-like	XP_004242729	Eukaryota; Viridiplantae; Streptophyta;	lppqk ih csm la	+		tomato
256	Sordaria macrospora k-hell: hypothetical protein SMAC_09022	XP_003343976	Eukaryota; Fungi; Dikarya;	lppvk lh csm la	+		fungi
257	Sorex araneus: PREDICTED: iron-sulfur cluster assembly enzyme ISCU, mitochondrial	XP_004615647	Eukaryota; Metazoa; Chordata;	lppvk lh csm la	+		shrew
258	Sphaerulina musiva SO2202: FeS cluster assembly scaffold IscU	EMF12877	Eukaryota; Fungi; Dikarya;	lppvk lh csm la	+		fungi
259	Sporisorium reilianum SRZ2: probable ISU1-Iron-Sulfur cluster nifU-like protein	CBQ69555	Eukaryota; Fungi; Dikarya;	lppvk lh csm la	+		fungi
260	Spraguea lophii 42_110: Iron sulfur cluster assembly protein 1	EPR79925	Eukaryota; Fungi; Microsporidia;	lppvk lh csm la	+		microsporidia
261	Stereum hirsutum FP-91666 SS1: FeS cluster assembly scaffold IscU	XP_007302347	Eukaryota; Fungi; Dikarya;	lppvk lh csm la	+		fungi
262	Strongylocentrotus purpuratus: unnamed protein product IscU	CAY10158	Eukaryota; Metazoa; Echinodermata;	lppvk lh csm la	+		worm
263	Sus scrofa: PREDICTED: iron-sulfur cluster assembly enzyme ISCU, mitochondrial-like	XP_005674511	Eukaryota; Metazoa; Chordata;	lppvk lh csm la	+		pig
264	Takifugu rubripes: PREDICTED: iron-sulfur cluster assembly enzyme ISCU, mitochondrial-like	XP_003975023	Eukaryota; Metazoa; Chordata;	lppvk lh csm la	+		pufferfish
265	Taphrina deformans PYCC 5710: Iron sulfur cluster assembly protein 1, mitochondrial	CCG80763	Eukaryota; Fungi; Dikarya;	lppvk lh csm la	+		fungi
266	Tetrahymena thermophila SB210: iron-sulfur cluster assembly scaffold protein, putative	EAS03808	Eukaryota; Alveolata; Ciliophora;	lppvk lh csm la	+		protozoan
267	Tetraodon nigroviridis: unnamed protein product	CAG08502	Eukaryota; Metazoa; Chordata;	lppvk lh csm la	+		pufferfish
268	Tetrapisispora blattae CBS 6284: hypothetical protein TBLA_0D03900	CCH60889	Eukaryota; Fungi; Dikarya;	lppvk lh csm la	+		fungi
269	Thalassiosira oceanica: hypothetical protein THAOC_14022, partial	EJK65159	Eukaryota; Stramenopiles; Bacillariophyta;	lppvk lh csm la	+		diatom, 321 aa
270	Thalassiosira pseudonana CCMP1335: NifU like N terminal domain, iron	EED90165	Eukaryota; Stramenopiles; Bacillariophyta;	lppvk lh csm la	+		diatom, 133 aa
271	Theobroma cacao: SufE/NifU family protein	XP_007036236	Eukaryota; Viridiplantae; Streptophyta;	lppvk lh csm la	+		cocoa tree
272	Thiomonas intermedia K12: SUF system FeS assembly protein, NifU family	ADG31812	Bacteria; Proteobacteria; Betaproteobacteria;	qfpar vk cam la	0		bacterial, suf type, aligns poorly
273	Togninia minima UCRPA7: putative iron sulfur cluster assembly protein 1 protein	XP_007912071	Eukaryota; Fungi; Dikarya;	lppvk lh csm la	+		fungi
274	Torulaspora delbrueckii: hypothetical protein TDEL_0A05930	XP_003679136	Eukaryota; Fungi; Dikarya;	lppvk lh csm la	+		fungi
275	Trachipleistophora hominis: Iron binding protein involved in Fe-S cluster formation	ELQ74294	Eukaryota; Fungi; Microsporidia;	lppvk lh csm la	+		microsporidia
276	Trametes versicolor FP-101664 SS1: FeS cluster assembly scaffold IscU	XP_008035614	Eukaryota; Fungi; Dikarya;	lppvk lh csm la	+		fungi
277	Treponema sp. JC4: SUF system FeS assembly protein, NifU family	EID84764	Bacteria; Spirochaetes; Spirochaetales;	hmpar vk cam lg	0		spirochete
278	Tribolium castaneum: hypothetical protein TcasGA2_TC010045	EFA07066	Eukaryota; Metazoa; Ecdysozoa;	lppvk lh csm la	+		beetle
279	Trichechus manatus latirostris: PREDICTED: iron-sulfur cluster assembly enzyme ISCU, mitochondrial	XP_004379055	Eukaryota; Metazoa; Chordata;	lppvk lh csm la	+		manatee
280	Trichoderma atroviride IMI 206040: iron sulfur cluster assembly protein	EHK44523	Eukaryota; Fungi; Dikarya;	lppvk lh csm la	+		trichoderma
281	Trichomonas vaginalis G3: NifU-like protein	XP_001580655	Eukaryota; Parabasalia; Trichomonadida;	lppvk qh csm la	+		trichomonas
282	Trichophyton rubrum CBS 118892: iron sulfur cluster assembly protein	EGD88399	Eukaryota; Fungi; Dikarya;	lppvk lh csm la	+		fungi
283	Trichoplax adhaerens: conserved hypothetical protein IscU	EDV28151	Eukaryota; Metazoa; Placozoa;	lppvk lh csm la	+		placozoans
284	Triticum urartu: Iron-sulfur cluster assembly enzyme ISCU, mitochondrial	EMS50026	Eukaryota; Viridiplantae; Streptophyta;	lppvk lh csm la	+		wheat
285	Trypanosoma cruzi: iron-sulfur cluster assembly protein, putative	EAN91283	Eukaryota; Euglenozoa; Kinetoplastida;	lppvk lh csm la	+		trypanosome
286	Tuber melanosporum Mel28: hypothetical protein	XP_002837710	Eukaryota; Fungi; Dikarya;	lppvk lh csm la	+		black truffle, fungi
287	Tursiops truncatus: PREDICTED: iron-sulfur cluster assembly enzyme ISCU, mitochondrial isoform 1	XP_004316460	Eukaryota; Metazoa; Chordata;	lppvk lh csm la	+		dolphin
288	Uncinocarpus reesii 1704: iron sulfur cluster assembly protein 1	EEP80827	Eukaryota; Fungi; Dikarya;	lppvk lh csm la	+		fungi
289	uncultured beta proteobacterium: SUF system FeS assembly protein, NifU family	BAL52936	Bacteria; Proteobacteria; Betaproteobacteria;	dypsr vk cam lp	0		uncultured proteobacterium
290	Ustilago maydis 521: hypothetical protein UM05632.1	XP_761779	Eukaryota; Fungi; Dikarya;	lppvk lh csm la	+		fungi
291	Vanderwaltozyma polyspora DSM 70294: hypothetical protein Kpol_1059p23	EDO16333	Eukaryota; Fungi; Dikarya;	lppvk lh csm la	+		fungi
292	Vavraia culicis subsp. floridensis: iron sulfur cluster assembly protein 1	ELA48168	Eukaryota; Fungi; Microsporidia;	lppvk lh csm la	+		microsporidium
293	Verrucomicrobium sp. 3C: hypothetical protein	WP_018290801	Bacteria; Verrucomicrobia; Verrucomicrobiae;	rfpqr vg cam ls	0		verrucomicrobium
294	Verticillium alfalfae VaMs.102: iron sulfur cluster assembly protein	EEY20962	Eukaryota; Fungi; Dikarya;	lppvk lh csm la	+		fungi
295	Vicugna pacos: PREDICTED: iron-sulfur cluster assembly enzyme ISCU, mitochondrial	XP_006204957	Eukaryota; Metazoa; Chordata;	lppvk lh csm la	+		camelid
296	Vitis vinifera: PREDICTED: iron sulfur cluster assembly protein 1, mitochondrial	XP_002265909	Eukaryota; Viridiplantae; Streptophyta;	lppvk lh csm la	+		grape
297	Vittaforma corneae ATCC 50505: iron sulfur cluster assembly protein 1	ELA41748	Eukaryota; Fungi; Microsporidia;	lppvk lh csm la	+		microsporidia
298	Wallemia sebi CBS 633.66: putative iron sulfur cluster assembly protein, mitochondrial precursor	XP_006958880	Eukaryota; Fungi; Dikarya;	lppvk lh csm la	+		fungi
299	Wickerhamomyces ciferrii: Iron sulfur cluster assembly protein 1,mitochondrial	CCH44237	Eukaryota; Fungi; Dikarya;	lppvk lh csm la	+		fungi
300	Wuchereria bancrofti: nitrogen fixation protein nifu, partial	EJW75325	Eukaryota; Metazoa; Ecdysozoa;	lppvk lh csm la	+		worm
301	Xenopus laevis: nitrogen fixation cluster-like	NP_001080701	Eukaryota; Metazoa; Chordata;	lppvk lh csm la	+		frog
302	Yarrowia lipolytica CLIB122: YALI0B04928p	CAG82740	Eukaryota; Fungi; Dikarya;	lppvk lh csm la	+		yeast
303	Zea mays: hypothetical protein ZEAMMB73_651365	AFW79235	Eukaryota; Viridiplantae; Streptophyta;		+		corn
304	Zonotrichia albicollis: PREDICTED: iron-sulfur cluster assembly enzyme ISCU, mitochondrial	XP_005495116	Eukaryota; Metazoa; Chordata;	lppvk lh csm la	+		sparrow
305	Zygosaccharomyces bailii ISA1307: probable Iron sulfur cluster assembly protein 1,mitochondrial	CDH08752	Eukaryota; Fungi; Dikarya;	lppvk lh csm la	+		fungi
306	Zymoseptoria tritici IPO323: hypothetical protein MYCGRDRAFT_73582	XP_003851666	Eukaryota; Fungi; Dikarya;	lppvk lh csm la	+		fungi

## Sheet: I at 141
#	I at position 141	accession	organism	12 aa block	aligns	exception	comment
1	Abiotrophia defectiva ATCC 49176: SUF system FeS assembly protein, NifU family	ESK66614	Bacteria; Firmicutes; Bacilli;	afpar yk cai la	0
2	Achromobacter arsenitoxydans SY8: scaffold protein	EHK67497	Bacteria; Proteobacteria; Betaproteobacteria;	lppvk vh csi la	+
3	Acidovorax avenae subsp. avenae ATCC 19860: FeS cluster assembly scaffold IscU	ADX46681	Bacteria; Proteobacteria; Betaproteobacteria;	lppvk ih csi la	+
4	Actinobacillus capsulatus: FeS cluster assembly scaffold IscU	WP_018651776	Bacteria; Proteobacteria; Gammaproteobacteria;	lppvk vh csi la	+
5	Advenella kashmirensis WT001: scaffold protein	AFK62433	Bacteria; Proteobacteria; Betaproteobacteria;	lppvk ih csi la	+
6	Aeromonas caviae: FeS cluster assembly scaffold IscU	WP_010675059	Bacteria; Proteobacteria; Gammaproteobacteria;	lppvk ih csi la	+
7	Agarivorans albus MKT 106: iron-sulfur cluster assembly scaffold protein IscU	GAD01468	Bacteria; Proteobacteria; Gammaproteobacteria;	lppvk ih csi la	+
8	Aggregatibacter actinomycetemcomitans D11S-1: FeS cluster assembly scaffold IscU	ACX82273	Bacteria; Proteobacteria; Gammaproteobacteria;	lppvk vh csi la	+
9	Albidiferax ferrireducens T118: FeS cluster assembly scaffold IscU	ABD69902	Bacteria; Proteobacteria; Betaproteobacteria;	lppvk ih csi la	+
10	Algicola sagamiensis: FeS cluster assembly scaffold IscU	WP_018692987	Bacteria; Proteobacteria; Gammaproteobacteria;	lppvk ih csi la	+
11	Alicycliphilus denitrificans BC: FeS cluster assembly scaffold IscU	ADU99945	Bacteria; Proteobacteria; Betaproteobacteria;	lppvk ih csi la	+
12	Aliivibrio fischeri: FeS cluster assembly scaffold IscU	WP_005417914	Bacteria; Proteobacteria; Gammaproteobacteria;	lppvk vh csi la	+
13	Alishewanella aestuarii B11: scaffold protein	EJI85030	Bacteria; Proteobacteria; Gammaproteobacteria;	lppvk ih csi la	+
14	Alteromonadales bacterium TW-7: FeS cluster assembly scaffold IscU	WP_006791975	Bacteria; Proteobacteria; Gammaproteobacteria;	lppvkih csi la	+
15	Anaplasma phagocytophilum str. CRT38: scaffold protein	EOA62186	Bacteria; Proteobacteria; Alphaproteobacteria;	lppvk ih csi la	+
16	Angomonas deanei: hypothetical protein AGDE_04605	EPY39323	Eukaryota; Euglenozoa; Kinetoplastida;	lppvk ih csi la	+	*	trypansosome
17	Aromatoleum aromaticum EbN1: IscU protein involved in Fe-S cluster formation	CAI09786	Bacteria; Proteobacteria; Betaproteobacteria;	lppvk ih csi la	+
18	Arsenophonus nasoniae: iron-binding protein	CBA72021	Bacteria; Proteobacteria; Gammaproteobacteria;	lppvk ih csi la	+
19	Avibacterium paragallinarum JF4211: Putative Iron-sulfur cofactor synthesis protein	CDF98465	Bacteria; Proteobacteria; Gammaproteobacteria;	lppvk vh csi la	+
20	Azoarcus sp. BH72: FeS cluster assembly scaffold IscU	WP_011765746	Bacteria; Proteobacteria; Betaproteobacteria;	lppvk ih csi la	+
21	Azospira oryzae: FeS cluster assembly scaffold IscU	WP_014237426	Bacteria; Proteobacteria; Betaproteobacteria;	lppvk ih csi la	+
22	Bacteria: MULTISPECIES: NifU-like protein	WP_016447123	Bacteria (eubacteria)	lppvk vh csi la	+
23	bacterium Ellin514: SUF system FeS assembly protein, NifU family	EEF61819	Bacteria; Verrucomicrobia; Verrucomicrobiae;	kfpar vk cai ls	0
24	beta proteobacterium CB: FeS cluster assembly scaffold IscU	YP_007502653	Bacteria; Proteobacteria; Betaproteobacteria	lppvk ih csi la	+
25	Bibersteinia trehalosi USDA-ARS-USMARC-188: NifU	AHG81568	Bacteria; Proteobacteria; Gammaproteobacteria;	lppvk vh csi la	+
26	blood disease bacterium R229: FeS cluster assembly scaffold protein	CCA83061	Bacteria; Proteobacteria; Betaproteobacteria;	lppvk ih csi la	+
27	Bombus impatiens: PREDICTED: nifU-like protein-like	XP_003494565	Eukaryota; Metazoa; Ecdysozoa;	lppvk ih csi la	+	*	bumble bee, also has Isu1 with M
28	Bordetella pertussis 2250905: FeS cluster assembly scaffold IscU	ETH00179	Bacteria; Proteobacteria; Betaproteobacteria;	lppvk ih csi la	+
29	Brachymonas chironomi: FeS cluster assembly scaffold IscU	WP_018715693	Bacteria; Proteobacteria; Betaproteobacteria;	lppvk vh csi la	+
30	Brenneria sp. EniD312: FeS cluster assembly scaffold IscU	EHD20575	Bacteria; Proteobacteria; Gammaproteobacteria;	lppvk ih csi la	+
31	Buchnera aphidicola (Cinara tujafilina): Fe-S assembly protein	YP_004590213	Bacteria; Proteobacteria; Gammaproteobacteria;	lppvk ih csi la	+
32	Burkholderia pseudomallei 1026a: scaffold protein	EIF66762	Bacteria; Proteobacteria; Betaproteobacteria;	lppvk ih csi la	+
33	Burkholderiaceae: MULTISPECIES: FeS cluster assembly scaffold IscU	WP_010809025	Bacteria; Proteobacteria; Betaproteobacteria;	lppvk ih csi la	+
34	Caldimonas manganoxidans: FeS cluster assembly scaffold IscU	WP_019559626	Bacteria; Proteobacteria; Betaproteobacteria;	lppvk ih csi la	+
35	Caloramator australicus RC3: Iron-sulfur cluster assembly scaffold protein IscU/NifU-like	CCJ34641	Bacteria; Firmicutes; Clostridia;	lpavk mh csi la	+
36	Candidatus Accumulibacter phosphatis clade IIA str. UW-1: FeS cluster assembly scaffold IscU	ACV35318	Bacteria; Proteobacteria; Betaproteobacteria;	lppvk ih csi la	+
37	Catenovulum agarivorans: FeS cluster assembly scaffold IscU	WP_016954973	Bacteria; Proteobacteria; Gammaproteobacteria;	lppvk ih csi la	+
38	Cedecea davisae DSM 4568: FeS cluster assembly scaffold IscU	EPF15256	Bacteria; Proteobacteria; Gammaproteobacteria;	lppvk ih csi la	+
39	Ceratitis capitata: PREDICTED: peptidase B-like	XP_004532375	Eukaryota; Metazoa; Ecdysozoa;	lppvk ih csi la	+	*	fly, 404 aa
40	Chitiniphilus shinanonensis: FeS cluster assembly scaffold IscU	WP_018746884	Bacteria; Proteobacteria; Betaproteobacteria;	lppvk ih csi la	+
41	Chromobacterium violaceum ATCC 12472: NifU family protein	AAQ58768	Bacteria; Proteobacteria; Betaproteobacteria;	lppvk ih csi la	+
42	Citrobacter freundii 4_7_47CFAA: NifU-like protein	EHL79752	Bacteria; Proteobacteria; Gammaproteobacteria;	lppvk ih csi la	+
43	Collimonas fungivorans Ter331: Iron-sulfur cluster assembly scaffold protein IscU	AEK62954	Bacteria; Proteobacteria; Betaproteobacteria;	lppvk ih csi la	+
44	Colwellia piezophila: FeS cluster assembly scaffold IscU	WP_019029442	Bacteria; Proteobacteria; Gammaproteobacteria;	lppvk ih csi la	+
45	Comamonas sp. B-9: FeS cluster assembly scaffold IscU	WP_021025849	Bacteria; Proteobacteria; Betaproteobacteria;	lppvkih csi la	+
46	Cronobacter condimenti 1330: Iron-sulfur cluster assembly scaffold protein IscU	CCJ70877	Bacteria; Proteobacteria; Gammaproteobacteria;	lppvk ih csi la	+
47	Cronobacter: MULTISPECIES: FeS cluster assembly scaffold IscU	WP_004385925	Bacteria; Proteobacteria; Gammaproteobacteria;	lppvk ih csi la	+
48	Cucumis sativus: PREDICTED: LOW QUALITY PROTEIN: nifU-like protein-like	XP_004153414	Eukaryota; Viridiplantae; Streptophyta;	lppvk ih csi la	+	*	cucumber, also has Isu1 with M
49	Cupriavidus basilensis OR16: scaffold protein	EHP40725	Bacteria; Proteobacteria; Betaproteobacteria;	lppvk ih csi la	+
50	Cupriavidus: MULTISPECIES: FeS cluster assembly scaffold IscU	WP_008649297	Bacteria; Proteobacteria; Betaproteobacteria;	lppvk ih csi la	+
51	Dasypus novemcinctus: PREDICTED: iron-sulfur cluster assembly enzyme ISCU, mitochondrial isoform 2	XP_004470232	Eukaryota; Metazoa; Chordata;	lppvk lh csi lq	+	*	armadillo, also has Isu1 with M and with R
52	Dechloromonas aromatica RCB: FeS cluster assembly scaffold IscU	AAZ46697	Bacteria; Proteobacteria; Betaproteobacteria;	lppvk ih csi la	+
53	Delftia acidovorans CCUG 15835: NifU-like protein	EPD45193	Bacteria; Proteobacteria; Betaproteobacteria;	lppvk vh csi la	+
54	Dickeya dadantii 3937: FeS cluster assembly scaffold protein	ADM99535	Bacteria; Proteobacteria; Gammaproteobacteria;	lppvk ih csi la	+
55	Dickeya: MULTISPECIES: FeS cluster assembly scaffold IscU	WP_015854432	Bacteria; Proteobacteria; Gammaproteobacteria;	lppvk ih csi la	+
56	Duganella zoogloeoides: FeS cluster assembly scaffold IscU	WP_019920391	Bacteria; Proteobacteria; Betaproteobacteria;	lppvk ih csi la	+
57	Edwardsiella ictaluri 93-146: FeS cluster assembly scaffold IscU, putative	ACR70332	Bacteria; Proteobacteria; Gammaproteobacteria;	lppvk ih csi la	+
58	Edwardsiella: MULTISPECIES: FeS cluster assembly scaffold IscU	WP_012849638	Bacteria; Proteobacteria; Gammaproteobacteria;	lppvk ih csi la	+
59	Eikenella corrodens ATCC 23834: FeS cluster assembly scaffold IscU	EEG23286	Bacteria; Proteobacteria; Betaproteobacteria;	lppvk ih csi la	+
60	Enterobacter aerogenes EA1509E: Iron-sulfur cluster assembly scaffold protein IscU	YP_007391505	Bacteria; Proteobacteria; Gammaproteobacteria;	lppvk ih csi la	+
61	Enterobacter: MULTISPECIES: FeS cluster assembly scaffold IscU	WP_003860661	Bacteria; Proteobacteria; Gammaproteobacteria;	lppvk ih csi la	+
62	Enterobacteriaceae bacterium 9_2_54FAA: NifU-like protein	EFV41725	Bacteria; Proteobacteria; Gammaproteobacteria;	lppvk ih csi la	+
63	Enterobacteriaceae: MULTISPECIES: FeS cluster assembly scaffold IscU	WP_002913991	Bacteria; Proteobacteria; Gammaproteobacteria;	lppvk ih csi la	+
64	Enterococcus gallinarum EGD-AAK12: FeS cluster assembly scaffold IscU	ERE62822	Bacteria; Firmicutes; Bacilli;	lppvk ih csi a	+
65	Enterovibrio calviensis: FeS cluster assembly scaffold IscU	WP_017008618	Bacteria; Proteobacteria; Gammaproteobacteria;	lppvk vh csi la	+
66	Escherichia albertii KF1: scaffold protein	AHE61315	Bacteria; Proteobacteria; Gammaproteobacteria;	lppvk ih csi la	+
67	Escherichia coli 'BL21-Gold(DE3)pLysS AG': FeS cluster assembly scaffold IscU	ACT28221	Bacteria; Proteobacteria; Gammaproteobacteria;	lppvk ih csi la	+
68	Escherichia coli O157:H7 str. 06-3745: scaffolding protein	EYZ52424	Bacteria; Proteobacteria; Gammaproteobacteria;	lppvk ih csi la	+
69	Facklamia hominis ACS-120-V-Sch10: NifU family SUF system FeS assembly protein	EPH07734	Bacteria; Firmicutes; Bacilli;	q fpar yk cai ls	0
70	Ferrimonas balearica DSM 9799: FeS cluster assembly scaffold IscU	ADN76961	Bacteria; Proteobacteria; Gammaproteobacteria;	lppvk ih csi la	+
71	Gallaecimonas xiamenensis 3-C-1: scaffold protein	EKE74938	Bacteria; Proteobacteria; Gammaproteobacteria;	lppvk ih csi la	+
72	Gallionella capsiferriformans ES-2: FeS cluster assembly scaffold IscU	ADL54686	Bacteria; Proteobacteria; Betaproteobacteria;	lppvk ih csi la	+
73	Gayadomonas joobiniege: FeS cluster assembly scaffold IscU	WP_017445320	Bacteria; Proteobacteria; Gammaproteobacteria;	lppvk ih csi la	+
74	Glaciecola agarilytica NO2: NifU-like protein	GAC03628	Bacteria; Proteobacteria; Gammaproteobacteria;	lppvk ih csi la	+
75	Glaciecola: MULTISPECIES: NifU-like protein	WP_007988965	Bacteria; Proteobacteria; Gammaproteobacteria;	lppvk ih csi la	+
76	Grimontia hollisae CIP 101886: iron-sulfur cluster assembly scaffold protein IscU	EEY72675	Bacteria; Proteobacteria; Gammaproteobacteria;	lppvk vh csi la	+
77	Haemophilus influenzae 10810: scaffold protein	YP_005178518	Bacteria; Proteobacteria; Gammaproteobacteria;	lppvk vh csi la	+
78	Haemophilus: MULTISPECIES: FeS cluster assembly scaffold IscU	WP_005691745	Bacteria; Proteobacteria; Gammaproteobacteria;	lppvk vh csi la	+
79	Hafnia alvei ATCC 51873: FeS cluster assembly scaffold IscU	EHM42637	Bacteria; Proteobacteria; Gammaproteobacteria;	lppvk ih csi la	+
80	Herbaspirillum frisingense GSF30: FeS cluster assembly scaffold protein	EOA03279	Bacteria; Proteobacteria; Betaproteobacteria;	lppvk ih csi la	+
81	Herbaspirillum: MULTISPECIES: FeS cluster assembly scaffold IscU	WP_008330359	Bacteria; Proteobacteria; Betaproteobacteria;	lppvk ih csi la	+
82	Herminiimonas arsenicoxydans: FeS cluster assembly scaffold IscU	CAL62372	Bacteria; Proteobacteria; Betaproteobacteria;	lppvk ih csi la	+
83	Histophilus somni: FeS cluster assembly scaffold IscU	WP_011608436	Bacteria; Proteobacteria; Gammaproteobacteria;	lppvk vh csi la	+
84	Hydrogenophaga sp. PBC: FeS cluster assembly scaffold IscU	WP_009515283	Bacteria; Proteobacteria; Betaproteobacteria;	lppvk ih csi la	+
85	Hylemonella gracilis ATCC 19624: fes cluster assembly scaffold iscu	EGI78486	Bacteria; Proteobacteria; Betaproteobacteria;	lppvk vh csi la	+
86	Idiomarina xiamenensis 10-D-4: FeS cluster assembly scaffold IscU	EKE85238	Bacteria; Proteobacteria; Gammaproteobacteria;	lppvk ih csi la	+
87	Ignisphaera aggregans DSM 17230: nitrogen-fixing NifU domain protein	ADM28155	Archaea; Crenarchaeota; Thermoprotei;	lppik yh csi la	+
88	Janthinobacterium lividum: FeS cluster assembly scaffold IscU	WP_010399775	Bacteria; Proteobacteria; Betaproteobacteria;	lppvk ih csi la	+
89	Kinetoplastibacterium blastocrithidii: nitrogen fixation protein NifU and related protein	WP_015237935	Bacteria; Proteobacteria; Betaproteobacteria;	lppvk ih csi la	+
90	Kingella denitrificans ATCC 33394: FeS cluster assembly scaffold IscU	EGC17701	Bacteria; Proteobacteria; Betaproteobacteria;	lppvk ih csi la	+
91	Klebsiella pneumoniae 120_1020: FeS cluster assembly scaffold IscU	EPP03415	Bacteria; Proteobacteria; Gammaproteobacteria;	lppvk ih csi la	+
92	Kosakonia radicincitans DSM 16656: nifU-like protein	EJI91311	Bacteria; Proteobacteria; Gammaproteobacteria;	lppvk ih csi la	+
93	Laribacter hongkongensis HLHK9: hypothetical protein LHK_02864	ACO75843	Bacteria; Proteobacteria; Betaproteobacteria;	lppvk ih csi la	+
94	Lautropia mirabilis ATCC 51599: FeS cluster assembly scaffold IscU	EFV95343	Bacteria; Proteobacteria; Betaproteobacteria;	lppvk ih csi la	+
95	Leeia oryzae: FeS cluster assembly scaffold IscU	WP_026182725	Bacteria; Proteobacteria; Betaproteobacteria;	lppvk ih csi la	+
96	Leptothrix cholodnii SP-6: FeS cluster assembly scaffold IscU	ACB33629	Bacteria; Proteobacteria; Betaproteobacteria;	lppvk ih csi la	+
97	Limnobacter sp. MED105: FeS cluster assembly scaffold IscU	WP_008251917	Bacteria; Proteobacteria; Betaproteobacteria;	lppvk ih csi la	+
98	Listonella anguillarum M3: FeS cluster assembly scaffold IscU	YP_008488748	Bacteria; Proteobacteria; Gammaproteobacteria;	lppvk vh csi la	+
99	Mannheimia haemolytica D153: FeS cluster assembly scaffold IscU	YP_008235372	Bacteria; Proteobacteria; Gammaproteobacteria;	lppvk vh csi la	+
100	Massilia niastensis: FeS cluster assembly scaffold IscU	WP_020652969	Bacteria; Proteobacteria; Betaproteobacteria;	lppvk ih csi la	+
101	Methylibium petroleiphilum: FeS cluster assembly scaffold IscU	WP_011829854	Bacteria; Proteobacteria; Betaproteobacteria;	lppvk ih csi la	+
102	Methyloversatilis sp. NVD: FeS cluster assembly scaffold IscU	WP_018412938	Bacteria; Proteobacteria; Betaproteobacteria;	lppvk ih csi la	+
103	Morganella morganii IS15: Iron-sulfur cluster assembly scaffold protein IscU	CDK65917	Bacteria; Proteobacteria; Gammaproteobacteria;	lppvk ih csi la	+
104	Moritella dasanensis: FeS cluster assembly scaffold IscU	WP_017221945	Bacteria; Proteobacteria; Gammaproteobacteria;	lppvk ih csi la	+
105	Neisseria gonorrhoeae 1291: nitrogen fixation protein nifU	EEH62291	Bacteria; Proteobacteria; Betaproteobacteria;	lppvk ih csi la	+
106	Neisseria meningitidis 053442: iron-sulfur cofactor synthesis protein nifU-like protein	ABX73467	Bacteria; Proteobacteria; Betaproteobacteria;	lppvk ih csi la	+
107	Nitrosomonas europaea ATCC 19718: NifU-like domain-containing protein	NP_841487	Bacteria; Proteobacteria; Betaproteobacteria;	dlptr vk cai lp	0
108	Nitrosospira multiformis ATCC 25196: SUF system FeS assembly protein	ABB74007	Bacteria; Proteobacteria; Betaproteobacteria;	dlptr vk cai lp	0
109	Oceanimonas smirnovii: FeS cluster assembly scaffold IscU	WP_019934291	Bacteria; Proteobacteria; Gammaproteobacteria;	lppvk ih csi la	+
110	Oligella ureolytica: FeS cluster assembly scaffold IscU	WP_018575268	Bacteria; Proteobacteria; Betaproteobacteria;	lppvk ih csi la	+
111	Oxalobacter formigenes HOxBLS: NifU-like protein	EEO28908	Bacteria; Proteobacteria; Betaproteobacteria;	lppvk ih csi la	+
112	Oxalobacteraceae bacterium AB_14: FeS cluster assembly scaffold IscU	WP_020702063	Bacteria; Proteobacteria; Betaproteobacteria;	lppvk ih csi la	+
113	Pandoraea sp. B-6: FeS cluster assembly scaffold IscU	WP_017234964	Bacteria; Proteobacteria; Betaproteobacteria;	lppvk ih csi la	+
114	Parasutterella excrementihominis CAG:233: feS cluster assembly scaffold IscU	CCX86154	Bacteria; Proteobacteria; Betaproteobacteria;	lppvk ih csi la	+
115	Pasteurella multocida 1500C: scaffold protein	EPE76038	Bacteria; Proteobacteria; Gammaproteobacteria;	lppvk vh csi la	+
116	Pasteurella pneumotropica: FeS cluster assembly scaffold IscU	WP_018355285	Bacteria; Proteobacteria; Gammaproteobacteria;	lppvk vh csi la	+
117	Pectobacterium atrosepticum SCRI1043: NifU-like protein	CAG76134	Bacteria; Proteobacteria; Gammaproteobacteria;	lppvk ih csi la	+
118	Pedosphaera parvula: nitrogen fixation protein NifU	WP_007414353	Bacteria; Verrucomicrobia; Verrucomicrobiae;	kfpar vk cai ls	0
119	Peptostreptococcaceae bacterium AS15: nitrogen-fixing protein NifU	WP_009082294	Bacteria; Firmicutes; Clostridia; Clostridiales;	nmpar vk cai la	0
120	Photobacterium angustum S14: putative NifU-related protein	EAS65391	Bacteria; Proteobacteria; Gammaproteobacteria;	lppvk vh csi la	+
121	Photorhabdus asymbiotica: FeS cluster assembly scaffold IscU	WP_015833508	Bacteria; Proteobacteria; Gammaproteobacteria;	lppvk ih csi la	+
122	Plesiomonas shigelloides 302-73: scaffold protein	EON89697	Bacteria; Proteobacteria; Gammaproteobacteria;	lppvk ih csi la	+
123	Polaromonas naphthalenivorans CJ2: FeS cluster assembly scaffold IscU	ABM37597	Bacteria; Proteobacteria; Betaproteobacteria;	lppvk ih csi la	+
124	Polynucleobacter necessarius subsp. asymbioticus QLW-P1DMWA-1: FeS cluster assembly scaffold IscU	ABP34706	Bacteria; Proteobacteria; Betaproteobacteria;	lppvk ih csi la	+
125	Proteobacteria: MULTISPECIES: FeS cluster assembly scaffold IscU	WP_008811461	Proteobacteria	lppvk ih csi la	+
126	Proteus mirabilis ATCC 29906: FeS cluster assembly scaffold IscU	EEI48605	Bacteria; Proteobacteria; Gammaproteobacteria;	lppvk ih csi la	+
127	Proteus penneri ATCC 35198: FeS cluster assembly scaffold IscU	EEG86081	Bacteria; Proteobacteria; Gammaproteobacteria;	lppvk ih csi la	+
128	Providencia alcalifaciens 205/92: FeS cluster assembly scaffold IscU	EUD09243	Bacteria; Proteobacteria; Gammaproteobacteria;	lppvk ih csi la	+
129	Pseudoalteromonas agarivorans S816: scaffold protein	ENO00732	Bacteria; Proteobacteria; Gammaproteobacteria;	lppvk ih csi la	+
130	Pseudoalteromonas: MULTISPECIES: FeS cluster assembly scaffold IscU	WP_008131649	Bacteria; Proteobacteria; Gammaproteobacteria;	lppvk ih csi la	+
131	Pseudogulbenkiania ferrooxidans 2002: FeS cluster assembly scaffold IscU	EEG10564	Bacteria; Proteobacteria; Betaproteobacteria;	lppvk ih csi la	+
132	pseudomallei group: MULTISPECIES: FeS cluster assembly scaffold IscU	WP_004192918	Bacteria; Proteobacteria; Betaproteobacteria;	lppvk ih csi la	+
133	Psychromonas ingrahamii 37: FeS cluster assembly scaffold IscU	ABM03150	Bacteria; Proteobacteria; Gammaproteobacteria;	lppvk ih csi la	+
134	Pusillimonas noertemannii: FeS cluster assembly scaffold IscU	WP_017525148	Bacteria; Proteobacteria; Betaproteobacteria;	lppvk ih csi la	+
135	Ralstonia eutropha H16: iron sulfur cluster assembly protein (IscU)	CAJ92300	Bacteria; Proteobacteria; Betaproteobacteria;	lppvk ih csi la	+
136	Ralstonia solanacearum FQY_4: Iron-sulfur cluster assembly scaffold protein IscU	AGH83504	Bacteria; Proteobacteria; Betaproteobacteria;	lppvk ih csi la	+
137	Ramlibacter tataouinensis TTB310: Fe-S cluster assembly protein	YP_004618947	Bacteria; Proteobacteria; Betaproteobacteria;	lppvk ih csi la	+
138	Raoultella ornithinolytica B6: scaffold protein	YP_007872306	Bacteria; Proteobacteria; Gammaproteobacteria;	lppvk ih csi la	+
139	Rheinheimera nanhaiensis E407-8: NifU-like protein	GAB57745	Bacteria; Proteobacteria; Gammaproteobacteria;	lppvk ih csi la	+
140	Rhodocyclaceae: MULTISPECIES: FeS cluster assembly scaffold IscU	WP_019916659	Bacteria; Proteobacteria; Betaproteobacteria;	lppvk ih csi la	+
141	Rhodoferax ferrireducens: FeS cluster assembly scaffold IscU	WP_011464470	Bacteria; Proteobacteria; Betaproteobacteria;	lppvk ih csi la	+
142	Rickettsiaceae bacterium Os18: FeS cluster assembly scaffold IscU	WP_026071727	Bacteria; Proteobacteria; Alphaproteobacteria;	llpvk ih csi la	+
143	Rubrivivax benzoatilyticus JA2 = ATCC BAA-35: FeS cluster assembly scaffold IscU	EGJ11168	Bacteria; Proteobacteria; Betaproteobacteria;	lppvk ih csi la	+
144	Rubrivivax: MULTISPECIES: FeS cluster assembly scaffold IscU	WP_009856108	Bacteria; Proteobacteria; Betaproteobacteria;	lppvk ih csi a	+
145	Salinivibrio costicola: FeS cluster assembly scaffold IscU	WP_025744586	Bacteria; Proteobacteria; Gammaproteobacteria;	lppvk vh csi la	+
146	Salmonella enterica subsp. arizonae serovar 62:z4,z23:- str. RSK2980: scaffold protein	YP_001569415	Bacteria; Proteobacteria; Gammaproteobacteria;	lppvk ih csi la	+
147	Salmonella: MULTISPECIES: FeS cluster assembly scaffold IscU	WP_000331704	Bacteria; Proteobacteria; Gammaproteobacteria;	lppvk ih csi la	+
148	Serratia marcescens BIDMC 81: NifU-like protein	EZQ61818	Bacteria; Proteobacteria; Gammaproteobacteria;	lppvk ih csi la	+
149	Serratia: MULTISPECIES: FeS cluster assembly scaffold IscU	WP_012146333	Bacteria; Proteobacteria; Gammaproteobacteria;	lppvk ih csi la	+
150	Shewanella: MULTISPECIES: FeS cluster assembly scaffold IscU	WP_011789190	Bacteria; Proteobacteria; Gammaproteobacteria;	lppvk ih csil a	+
151	Shigella: MULTISPECIES: FeS cluster assembly scaffold IscU	WP_000331709	Bacteria; Proteobacteria; Gammaproteobacteria;	lppvk ih csi la	+
152	Shimwellia blattae DSM 4481 = NBRC 105725: iron-sulfur cluster assembly protein IscU	GAB81219	Bacteria; Proteobacteria; Gammaproteobacteria;	lppvk ih csi la	+
153	Sideroxydans lithotrophicus ES-1: FeS cluster assembly scaffold IscU	ADE12482	Bacteria; Proteobacteria; Betaproteobacteria;	lppvk ih csi la	+
154	Simonsiella muelleri ATCC 29453: NifU-like protein	EFG30744	Bacteria; Proteobacteria; Betaproteobacteria;	lppvk ih csi la	+
155	Strigomonas culicis: hypothetical protein STCU_01571	EPY34464	Eukaryota; Euglenozoa; Kinetoplastida;	lppvk ih csi la	+	*	trypanosome
156	Sutterella: MULTISPECIES: FeS cluster assembly scaffold IscU	WP_005432725	Bacteria; Proteobacteria; Betaproteobacteria;	lppvk ih csi la	+
157	Taylorella asinigenitalis 14/45: Fe-S cluster assembly scaffold iscu	YP_007821837	Bacteria; Proteobacteria; Betaproteobacteria;	lppvk ih csi la	+
158	Thalassospira profundimaris WP0211: scaffold protein	EKF08163	Bacteria; Proteobacteria; Alphaproteobacteria;	lppvk ih csi la	+
159	Thauera aminoaromatica S2: scaffold protein	ENO84162	Bacteria; Proteobacteria; Betaproteobacteria;	lppvk ih csi la	+
160	Thauera: MULTISPECIES: FeS cluster assembly scaffold IscU	WP_004315115	Bacteria; Proteobacteria; Betaproteobacteria;	lppvk ih csi la	+
161	Thermotoga maritima MSB8: nitrogen fixation protein NifU	YP_008991537	Bacteria; Thermotogae; Thermotogales;	nypar vk cfi la	0
162	Thermotoga: MULTISPECIES: nitrogen fixation protein NifU	WP_004081568	Bacteria; Thermotogae; Thermotogales;	nypar vk cfi la	0
163	Thiobacillus denitrificans ATCC 25259: FeS cluster assembly scaffold IscU	AAZ97118	Bacteria; Proteobacteria; Betaproteobacteria;	lppvk ih csi la	+
164	Thiomonas arsenitoxydans: NifU-like protein	YP_003623866	Bacteria; Proteobacteria; Betaproteobacteria;	lppvk ih csi la	+
165	Tolumonas auensis DSM 9187: FeS cluster assembly scaffold IscU	ACQ93617	Bacteria; Proteobacteria; Gammaproteobacteria;	lppvk ih csi la	+
166	Trichinella spiralis: iron-sulfur cluster assembly protein IscU	XP_003373558	Eukaryota; Metazoa; Ecdysozoa;	lppvk ih csi la	+	*	worm, 1833 aa
167	Uliginosibacterium gangwonense: FeS cluster assembly scaffold IscU	WP_018606822	Bacteria; Proteobacteria; Betaproteobacteria;	lppvk ih csi la	+
168	uncultured prokaryote: FeS cluster assembly scaffold protein	AGE14081	uncultured prokaryote	lppvk ih csi la	+
169	Variovorax paradoxus B4: putative FeS cluster assembly scaffold IscU	AGU49416	Bacteria; Proteobacteria; Betaproteobacteria;	lppvk ih csi la	+
170	Verminephrobacter aporrectodeae: FeS cluster assembly scaffold IscU	WP_010102715	Bacteria; Proteobacteria; Betaproteobacteria;	lppvk ih csi la	+
171	Vibrio cholera CIRS 101: iron-sulfur cluster assembly scaffold protein IscU	EET92981	Bacteria; Proteobacteria; Gammaproteobacteria;	lppvk ih csi la	+
172	Vibrio: MULTISPECIES: FeS cluster assembly scaffold IscU	WP_014230930	Bacteria; Proteobacteria; Gammaproteobacteria;	lppvk vh csi la	+
173	Vibrionales: MULTISPECIES: FeS cluster assembly scaffold IscU	WP_004740340	Bacteria; Proteobacteria; Gammaproteobacteria	lppvk vh csi la	+
174	Vitreoscilla stercoraria: FeS cluster assembly scaffold IscU	WP_019957360	Bacteria; Proteobacteria; Betaproteobacteria;	lppvk vh csi la	+
175	Xenorhabdus bovienii SS-2004: Fe-S assembly protein	YP_003468915	Bacteria; Proteobacteria; Gammaproteobacteria;	lppvk ih csi la	+
176	Yersinia enterocolitica (type O:2) str. YE3094/96: NifU family protein	CCV62615	Bacteria; Proteobacteria; Gammaproteobacteria;	lppvk ih csi la	+
177	Yersinia: MULTISPECIES: FeS cluster assembly scaffold IscU	WP_005159510	Bacteria; Proteobacteria; Gammaproteobacteria;	lppvk ih csi la	+
178	Yokenella regensburgei ATCC 43003: FeS cluster assembly scaffold IscU	EHM44583	Bacteria; Proteobacteria; Gammaproteobacteria;	lppvk ih csi la	+

## Sheet: V at 141
#	V at position 141	accesssion #	organism	12 aa block	align	exception	comments
1	Acaryochloris sp. HICR111A: Fe-S cluster assembly protein	AFM92572	Bacteria; Cyanobacteria; Oscillatoriophycideae	lpeak mh csv mg	0
2	Acetobacterium woodii DSM 1030: FeS cluster assembly scaffold protein NifU	AFA47767	Bacteria; Firmicutes; Clostridia	lpsek ih csv la	+
3	Acetonema longum DSM 6540: nifU protein	EGO65460	Bacteria; Firmicutes; Negativicutes	lppvk mh csv la	+
4	Acidaminococcus fermentans DSM 20731: NifU family SUF system FeS assembly protein	YP_003398171	Bacteria; Firmicutes; Negativicutes	nmpar vk cav la	0
5	Acidiphilium sp. CAG:727: feS cluster assembly scaffold protein NifU	WP_022418625	Bacteria; Proteobacteria; Alphaproteobacteria	lppqk ih csv la	+
6	Acidithiobacillus caldus SM-1: Fe-S cluster formation/repair protein	AEK57477	Bacteria; Proteobacteria; Gammaproteobacteria	lppvk ih csv la	+
7	Acidithiobacillus ferrooxidans ATCC 23270: FeS cluster assembly scaffold protein IscU	ACK79756	Bacteria; Proteobacteria; Gammaproteobacteria	lppvk ih csv la	+
8	Acidobacteriaceae bacterium KBS 83: FeS cluster assembly scaffold IscU	WP_020711616	Bacteria; Acidobacteria; Acidobacteriales	lppvk ih csv la	+
9	Acidobacterium capsulatum: FeS cluster assembly scaffold IscU	ACO32992	Bacteria; Acidobacteria; Acidobacteriales	lppvk ih csv la	+
10	Acinetobacter: MULTISPECIES: FeS cluster assembly scaffold IscU	WP_005014568	Bacteria; Proteobacteria; Gammaproteobacteria	lppvk vh csv la	+
11	Aegilops tauschii: NifU-like protein	EMT00243	Eukaryota; Viridiplantae; Streptophyta	lppvk ih csv la	+	*	wheat, also has Isu1 that uses M
12	Agarivorans albus MKT 106: iron-sulfur cluster assembly scaffold protein NifU	GAD01786	Bacteria; Proteobacteria; Gammaproteobacteria	lppek mh csv mg	0
13	Alkaliphilus metalliredigens QYMF: NifU domain-containing protein	YP_001320267	Bacteria; Firmicutes; Clostridia	lppvk mh csv la	+
14	Allochromatium vinosum DSM 180: Fe-S cluster assembly protein NifU	ADC62337	Bacteria; Proteobacteria; Gammaproteobacteria	lppek mh csv mg	0
15	Aminobacterium colombiense DSM 12261: FeS cluster assembly scaffold protein NifU	ADE56311	Bacteria; Synergistetes; Synergistia	lppik mh csv la	+
16	Amphritea japonica: FeS cluster assembly scaffold IscU	WP_019622703	Bacteria; Proteobacteria; Gammaproteobacteria	lppvk ih csv la	+
17	Anabaena cylindrica PCC 7122: Fe-S cluster assembly protein NifU	AFZ57583	Bacteria; Cyanobacteria; Nostocales	lpeak mh csv mg	0
18	Anaerofustis stercorihominis DSM 17244: putative SUF system FeS assembly protein, NifU family	EDS72374	Bacteria; Firmicutes; Clostridia	lpapk vh csv la	+
19	Anaeromyxobacter: MULTISPECIES: FeS cluster assembly scaffold IscU	WP_012524699	Bacteria; Proteobacteria; Deltaproteobacteria	lppvk ih csv la	+
20	Anaerotruncus colihominis DSM 17241: Fe-S iron-sulfur cluster assembly protein, NifU family	EDS10041	Bacteria; Firmicutes; Clostridia	lpask ih csv la	+
21	Arcobacter butzleri 7h1h: FeS cluster assembly scaffold protein IscU	AGR76919	Bacteria; Proteobacteria; Epsilonproteobacteria	vppqk mh csv ma	0
22	Azoarcus sp. BH72: nitrogen fixation protein NifU	YP_932057	Bacteria; Proteobacteria; Betaproteobacteria	lppek mh csv mg	0
23	Azospirillum brasilense Sp245: Fe-S cluster assembly protein	YP_005030936	Bacteria; Proteobacteria; Alphaproteobacteria	lppek mh csv mg	0
24	Azotobacter vinelandii CA: Nitrogen fixation Fe-S cluster scaffold protein	AGK13788	Bacteria; Proteobacteria; Gammaproteobacteria	lppek mh csv mg	0
25	Azotobacter vinelandii: FeS cluster assembly scaffold IscU	WP_012702550	Bacteria; Proteobacteria; Gammaproteobacteria	lppvk ih csv la	+
26	Beggiatoa alba B18LD: Fe-S cluster assembly protein NifU	EIJ43869	Bacteria; Proteobacteria; Gammaproteobacteria	lppek mh csv mg	0
27	beta proteobacterium KB13: FeS cluster assembly scaffold IscU	EDZ64374	Bacteria; Proteobacteria; Betaproteobacteria	lppvk ih csv la	+
28	Bilophila sp. 4_1_30: Fe-S cluster assembly protein NifU	EGW43027	Bacteria; Proteobacteria; Deltaproteobacteria	lprek mh csv mg	0
29	Bos mutus: Iron-sulfur cluster assembly enzyme ISCU, mitochondrial, partial	ELR60594	Eukaryota; Metazoa; Chordata	lppvq lh csv la	+	*	high alitutde Yak, also has Isu1 with M
30	Brachyspira hampsonii 30446: NifU-like N terminal domain-containing protein	EKV56682	Bacteria; Spirochaetes; Spirochaetales	lpeek mh csv mg	0
31	Brenneria sp. EniD312: Fe-S cluster assembly protein NifU	EHD21376	Bacteria; Proteobacteria; Gammaproteobacteria	lppek mh csv mg	0
32	butyrate-producing bacterium SS3/4: SUF system FeS assembly protein, NifU family	YP_007823386	Bacteria; Firmicutes; Clostridia	hmpar vk cav lg	0
33	Butyricicoccus pullicaecorum 1.2: FeS cluster assembly scaffold protein NifU	EOQ35998	Bacteria; Firmicutes; Clostridia	lppvk mh csv la	+
34	Butyrivibrio fibrisolvens 16/4: FeS cluster assembly scaffold protein NifU, Clostridium type	YP_007819038	Bacteria; Firmicutes; Clostridia	lpahk lh csv la	+
35	Caenispirillum salinarum: Iron-sulfur cluster assembly scaffold protein NifU	WP_009539899	Bacteria; Proteobacteria; Alphaproteobacteria	lppek mh csv mg	0
36	Caldicellulosiruptor bescii DSM 6725: feS cluster assembly scaffold protein NifU	ACM60807	Bacteria; Firmicutes; Clostridia	lpank lh csv la	+
37	Caldicellulosiruptor: MULTISPECIES: FeS cluster assembly scaffold IscU	WP_013402945	Bacteria; Firmicutes; Clostridia	lpank lh csv la	+
38	Caldisericum exile AZM16c01: putative iron-sulfur cluster assembly protein IscU	BAL81017	Bacteria; Caldiserica; Caldisericia	lppvk vh csv la	+
39	Calditerrivibrio nitroreducens DSM 19672: fes cluster assembly scaffold protein nifu	ADR19586	Bacteria; Deferribacteres; Deferribacterales	lppak ih csv ma	+
40	Calothrix parietina: Fe-S cluster assembly protein NifU	WP_015196130	Bacteria; Cyanobacteria; Nostocales	lpeak mh csv mg	0
41	Calyptogena okutanii thioautotrophic gill symbiont: FeS cluster assembly scaffold IscU	WP_011929919	Bacteria; Proteobacteria; Gammaproteobacteria	lppvk ih csv la	+
42	Caminibacter mediatlanticus TB-2: NifU family protein	EDM24267	Bacteria; Proteobacteria; Epsilonproteobacteria	fppqk mh csv ma	0
43	Campylobacter coli 1091: hypothetical protein cco19_00785	EIA66970	Bacteria; Proteobacteria; Epsilonproteobacteria	vppqk mh csv ma	0
44	Campylobacter: MULTISPECIES: nitrogen-fixing protein NifU	WP_004318029	Bacteria; Proteobacteria; Epsilonproteobacteria	vppqk mh csv ma	0
45	Candidatus Accumulibacter phosphatis clade IIA str. UW-1: Fe-S cluster assembly protein NifU	YP_003169530	Bacteria; Proteobacteria; Betaproteobacteria	lppek mh csv mg	0
46	Cellulosilyticum lentocellum: nitrogen-fixing protein NifU	WP_013658253	Bacteria; Firmicutes; Clostridia	tmpar vk cav ls	0
47	Centipeda periodontii DSM 2778: NifU domain protein	EGK57892	Bacteria; Firmicutes; Negativicutes	nmpar vk cav la	0
48	Chlorobaculum parvum NCIB 8327: nitrogen-fixing NifU domain protein	ACF10669	Bacteria; Chlorobi; Chlorobia	lpenk ih csv lg	0
49	Chlorobium chlorochromatii CaD3: IscU protein	ABB27485	Bacteria; Chlorobi; Chlorobia	lpdnk ih csv lg	0
50	Chlorogloeopsis fritschii: nitrogen fixation protein NifU	WP_016872370	Bacteria; Cyanobacteria; Stigonematales	lpeak mh csv mg	0
51	Chloroherpeton thalassium ATCC 35110: FeS cluster assembly scaffold IscU	ACF15137	Bacteria; Chlorobi; Chlorobia	lppvk ih csv la	+
52	Chroococcidiopsis thermalis PCC 7203: Modular FeS cluster scaffolding protein NifU	AFY89976	Bacteria; Cyanobacteria; Pleurocapsales	lpeak mh csv mg	0
53	Clostridiaceae bacterium L21-TH-D2: Iron-sulfur cluster assembly scaffold protein	WP_006315256	Bacteria; Firmicutes; Clostridia	lppvk mh csv la	+
54	Clostridiales: MULTISPECIES: FeS cluster assembly scaffold IscU	WP_004613876	Bacteria; Firmicutes; Clostridia	lppvk vh csl la	+
55	Clostridium botulinum A str. ATCC 19397: FeS cluster assembly scaffold protein NifU	ABS35410	Bacteria; Firmicutes; Clostridia	lppvk mh csv la	+
56	Clostridium perfringens ATCC 13124: FeS cluster assembly scaffold protein NifU	ABG82316	Bacteria; Firmicutes; Clostridia	lppvk mh csv la	+
57	Clostridium: MULTISPECIES: FeS cluster assembly scaffold IscU	WP_011968440	Bacteria; Firmicutes; Clostridia	lppvk mh csv la	+
58	Clostridium tyrobutyricum: hypothetical protein		Bacteria; Firmicutes; Clostridia;	mmpar vk cav la	0
59	Coleofasciculus chthonoplastes PCC 7420: Fe-S cluster assembly protein NifU	EDX77726	Bacteria; Cyanobacteria; Oscillatoriophycideae	lpqek mh csv mg	0
60	Coprococcus catus GD/7: SUF system FeS assembly protein, NifU family	YP_007771333	Bacteria; Firmicutes; Clostridia	hmpar vk cav lg	0
61	Coprococcus: MULTISPECIES: nitrogen-fixing protein NifU	WP_004851759	Bacteria; Firmicutes; Clostridia	hmpar vk cav lg	0
62	Coprothermobacter platensis: NifU protein	WP_018963429	Bacteria; Firmicutes; Clostridia	lppvk yh csv la	+
63	Corallococcus coralloides DSM 2259: scaffold protein	AFE09148	Bacteria; Proteobacteria; Deltaproteobacteria	lppvk ih csv la	+
64	Cryptobacterium sp. CAG:338: feS cluster assembly scaffold protein NifU	WP_022379096	Bacteria; Actinobacteria; Coriobacteridae	lpahk vh csv la	+
65	cyanobacterium PCC 7702: nitrogen fixation protein NifU	WP_017320753	Bacteria; Cyanobacteria	lpqak mh csv mg	0
66	Cyanothece sp. ATCC 51142: iron-sulfur cluster assembly protein	ACB49909	Bacteria; Cyanobacteria; Oscillatoriophycideae	lpeek mh csv mg	0
67	Cylindrospermopsis raciborskii CS-505: Fe-S cluster assembly protein NifU	EFA68739	Bacteria; Cyanobacteria; Nostocales	lpeak mh csv mg	0
68	Cystobacter fuscus DSM 2262: Iron-sulfur cluster assembly scaffold protein IscU	EPX62269	Bacteria; Proteobacteria; Deltaproteobacteria	lppvk ih csv la	+
69	Dechloromonas aromatica RCB: Fe-S cluster assembly protein NifU	AAZ46263	Bacteria; Proteobacteria; Betaproteobacteria	lppek mh csv mg	0
70	Deferribacter desulfuricans SSM1: nitrogen-fixing NifU domain protein	BAI81016	Bacteria; Deferribacteres; Deferribacterales	lppak ih csv ma	+
71	Dehalobacter: MULTISPECIES: FeS cluster assembly scaffold IscU	WP_015043898	Bacteria; Firmicutes; Clostridia	lpask vh csv lg	0
72	Dehalogenimonas lykanthroporepellens BL-DC-9: FeS cluster assembly scaffold protein NifU	YP_003758020	Bacteria; Chloroflexi; Dehalococcoidia	lppvk mh csv la	+
73	delta proteobacterium MLMS-1: Fe-S cluster assembly protein NifU	EAT02758	Bacteria; Proteobacteria; Deltaproteobacteria	lpkek mh csv mg	0
74	Denitrovibrio acetiphilus DSM 12809: FeS cluster assembly scaffold protein NifU	ADD68016	Bacteria; Deferribacteres; Deferribacterales	lppak ih csv ma	+
75	Desulfarculus baarsii DSM 2075: Fe-S cluster assembly protein NifU	ADK84061	Bacteria; Proteobacteria; Deltaproteobacteria	lpkek mh csv mg	0
76	Desulfatibacillum alkenivorans AK-01: Fe-S cluster assembly protein NifU	ACL04341	Bacteria; Proteobacteria; Deltaproteobacteria	lprek mh csv mg	0
77	Desulfobacter curvatus: nitrogen fixation protein NifU	WP_020589895	Bacteria; Proteobacteria; Deltaproteobacteria	lpkek mh csv mg	0
78	Desulfobacterium autotrophicum HRM2: iron-sulfur cluster assembly protein	ACN17169	Bacteria; Proteobacteria; Deltaproteobacteria	lpkek mh csv mg	0
79	Desulfobacula toluolica Tol2: iron-sulfur cluster assembly protein	YP_006759135	Bacteria; Proteobacteria; Deltaproteobacteria	lpkek mh csv mg	0
80	Desulfobulbus propionicus DSM 2032: Fe-S cluster assembly protein NifU	ADW18949	Bacteria; Proteobacteria; Deltaproteobacteria	lpkek mh csv mg	0
81	Desulfocapsa sulfexigens DSM 10523: Fe-S cluster assembly protein NifU	AGF78897	Bacteria; Proteobacteria; Deltaproteobacteria	lpkek mh csv mg	0
82	Desulfococcus multivorans DSM 2059: Fe-S cluster assembly protein NifU	EPR38996	Bacteria; Proteobacteria; Deltaproteobacteria	lpkek mh csv mg	0
83	Desulfohalobium retbaense DSM 5692: Fe-S cluster assembly protein NifU	ACV67403	Bacteria; Proteobacteria; Deltaproteobacteria	lpkek mh csv mg	0
84	Desulfomicrobium baculatum DSM 4028: nitrogen-fixing NifU domain protein	ACU88657	Bacteria; Proteobacteria; Deltaproteobacteria	lpdnk vh csv lg	0
85	Desulfomonile tiedjei DSM 6799: Fe-S cluster assembly protein NifU	YP_006447919	Bacteria; Proteobacteria; Deltaproteobacteria	lpvek mh csv mg	0
86	Desulfonatronospira thiodismutans ASO3-1: Fe-S cluster assembly protein NifU	EFI35452	Bacteria; Proteobacteria; Deltaproteobacteria	lpkek mh csv mg	0
87	Desulfotalea psychrophila LSv54: nitrogen fixation protein (NifU)	YP_065966	Bacteria; Proteobacteria; Deltaproteobacteria	lpkek mh csv mg	0
88	Desulfotignum phosphitoxidans DSM 13687: nitrogen fixation protein NifU	EMS78041	Bacteria; Proteobacteria; Deltaproteobacteria	lpkek mh csv mg	0
89	Desulfovibrio: MULTISPECIES: nitrogen fixation protein NifU	WP_008684918	Bacteria; Proteobacteria; Deltaproteobacteria	lpkqk mh csv mg	0
90	Desulfurispirillum indicum S5: nitrogen-fixing NifU domain protein	ADU65456	Bacteria; Chrysiogenetes; Chrysiogenales	vppqk mh csv ma	0
91	Desulfuromonas acetoxidans DSM 684: nitrogen-fixing NifU-like	EAT17007	Bacteria; Proteobacteria; Deltaproteobacteria	vppqk mh csv ma	0
92	Dethiosulfovibrio peptidovorans DSM 11002: FeS cluster assembly scaffold protein NifU	EFC91888	Bacteria; Synergistetes; Synergistia	lppvk mh csv la	+
93	Dialister sp. CAG:588: nifU family SUF system FeS assembly protein	WP_022513287	Bacteria; Firmicutes; Negativicutes	kmpvr vk cav lg	0
94	Dickeya: MULTISPECIES: nitrogen fixation protein NifU	WP_012764133	Bacteria; Proteobacteria; Gammaproteobacteria	lppek mh csv mg	0
95	Dictyoglomus thermophilum H-6-12: NifU protein	ACI19665	Bacteria; Dictyoglomi; Dictyoglomales	lppnk lh csv la	+
96	Ectothiorhodospira sp. PHS-1: Fe-S cluster assembly protein NifU	EHQ53636	Bacteria; Proteobacteria; Gammaproteobacteria	lppek mh csv mg	0
97	Elusimicrobium minutum Pei191: Fe-S cluster assembly protein NifU	ACC97993	Bacteria; Elusimicrobia; Elusimicrobia	lpeek mh csv mg	0
98	endosymbiont of Riftia pachyptila (vent Ph05): serine O-acetyltransferase	EGV51053	Bacteria; Proteobacteria; Gammaproteobacteria	lppvk vh csv la	+
99	endosymbiont of Tevnia jerichonana (vent Tica): iron-sulfur cluster assembly scaffold protein IscU	EGW53780	Bacteria; Proteobacteria; Gammaproteobacteria	lppvk vh csv la	+
100	endosymbiont of unidentified scaly snail isolate Monju: nitrogen fixation protein NifU and related proteins	BAN68964	Bacteria; Proteobacteria; Gammaproteobacteria	lppvk vh csv la	+
101	Endozoicomonas elysicola: hypothetical protein IscU	KEI71538	Bacteria; Proteobacteria; Gammaproteobacteria	lppvk ih csv la	+
102	Enhydrobacter aerosaccus SK60: FeS cluster assembly scaffold IscU	EEV22200	Bacteria; Proteobacteria; Gammaproteobacteria	lppvk vh csv la	+
103	Entamoeba invadens IP1: nitrogen fixation protein nifU, putative	XP_004254879	Eukaryota; Amoebozoa; Archamoebae;	vppqk mh csv ms	0	*	protozoan parasite
104	Entamoeba histolytica: NifU	AAL91100	Eukaryota; Amoebozoa; Archamoebae	vppqk mh csv ms	0	*	protozoan parasite
105	Enterobacter sacchari SP1: nitrogen fixation protein NifU	AHJ73983	Bacteria; Proteobacteria; Gammaproteobacteria	lppqk mh csv mg	0
106	Ethanoligenens harbinense YUAN-3: NifU family SUF system FeS assembly protein	YP_004092852	Bacteria; Firmicutes; Clostridia	nmpar vk cav lg	0
107	Eubacterium cellulosolvens 6: SUF system FeS assembly protein, NifU family	EIM57476	Bacteria; Firmicutes; Clostridia	hmpar vk cav lg	0
108	Eubacterium eligens ATCC 27750: nitrogen fixation protein NifU-like protein	YP_002935408	Bacteria; Firmicutes; Clostridia	hmpar vk cav lg	0
109	Eubacterium hallii CAG:12: fe-S iron-sulfur cluster assembly protein NifU family	CDB17102	Bacteria; Firmicutes; Clostridia	lpthk ih csv la	+
110	Eubacterium infirmum F0142: hypothetical protein HMPREF0380_01083	EHO84682	Bacteria; Firmicutes; Clostridia	lpavk ih csv la	+
111	Eubacterium limosum KIST612: NifU domain-containing protein	ADO38702	Bacteria; Firmicutes; Clostridia	lptek ih csv la	+
112	Eubacterium ramulus ATCC 29099: Fe-S iron-sulfur cluster assembly protein, NifU family	ERK49902	Bacteria; Firmicutes; Clostridia	lppak ih csv la	+
113	Eubacterium saphenum ATCC 49989: NifU-like N-terminal domain protein	EEU03811	Bacteria; Firmicutes; Clostridia	lpaik ih csv la	+
114	Eubacterium siraeum 70/3: FeS cluster assembly scaffold protein NifU, Clostridium type	YP_007775950	Bacteria; Firmicutes; Clostridia	lppak lh csv la	+
115	Eubacterium sp. CAG:115: fe-S iron-sulfur cluster assembly protein NifU family	WP_021957395	Bacteria; Firmicutes; Clostridia	lpahk ih csv la	+
116	Faecalibacterium cf. prausnitzii KLE1255: Fe-S iron-sulfur cluster assembly protein, NifU family	EFQ08189	Bacteria; Firmicutes; Clostridia	lppik vh csv la	+
117	Faecalibacterium sp. CAG:1138: feS cluster assembly scaffold protein NifU Clostridium type	WP_021898757	Bacteria; Firmicutes; Clostridia	lppqk ih csv la	+
118	filamentous cyanobacterium ESFC-1: hypothetical protein IscU	WP_018398338	Bacteria; Cyanobacteria; Oscillatoriophycideae	lpeek mh csv mg	0
119	Filifactor alocis ATCC 35896: Fe-S iron-sulfur cluster assembly protein, NifU family	EFE28221	Bacteria; Firmicutes; Clostridia	lppvk mh csv la	+
120	Finegoldia magna ACS-171-V-Col3: SUF system FeS assembly protein, NifU family	EFK93353	Bacteria; Firmicutes; Clostridia	tlpar vk cav ls	0
121	Firmicutes bacterium CAG:103: fe-S iron-sulfur cluster assembly protein NifU family	WP_016413435	Bacteria; Firmicutes	lpaqk ih csv la	+
122	Fischerella: MULTISPECIES: nitrogen fixation protein NifU	WP_009459217	Bacteria; Cyanobacteria; Stigonematales	lpeak mh csv mg	0
123	Flavonifractor plautii ATCC 29863: Fe-S iron-sulfur cluster assembly protein, NifU family	EHM52044	Bacteria; Firmicutes; Clostridia	lpayk mh csv la	+
124	Flexistipes sinusarabici DSM 4947: FeS cluster assembly scaffold protein NifU	YP_004603876	Bacteria; Deferribacteres; Deferribacterales	lppak ih csv ma	+
125	Fretibacterium fastidiosum: FeS cluster assembly scaffold protein NifU, Clostridium type	YP_007827223	Bacteria; Synergistetes; Synergistia	lppvk mh csv la	+
126	Fusobacterium: MULTISPECIES: FeS cluster assembly scaffold IscU	WP_005910263	Bacteria; Fusobacteria; Fusobacteriales	lpavk mh csv la	+
127	gamma proteobacterium BDW918: FeS cluster assembly scaffold IscU	WP_008248899	Bacteria; Proteobacteria; Gammaproteobacteria	lppvk ih csv la	+
128	Gemmata obscuriglobus: FeS cluster assembly scaffold IscU	WP_010037760	Bacteria; Planctomycetes; Planctomycetia	lppvk vh csv la	+
129	Geobacter bemidjiensis Bem: nitrogen fixation iron-sulfur cluster assembly protein NifU	ACH38586	Bacteria; Proteobacteria; Deltaproteobacteria	lpeek mh csv mg	0
130	Geopsychrobacter electrodiphilus: nitrogen-fixing protein NifU	WP_020674516	Bacteria; Proteobacteria; Deltaproteobacteria	vppqk mh csv ma	0
131	Giardia intestinalis ATCC 50581: NifU-like protein	EES99086	Eukaryota; Diplomonadida; Hexamitidae	lppvk lh csv la	+	*	protozoan parasite
132	Gloeobacter violaceus PCC 7421: gsl4383	BAC92324	Bacteria; Cyanobacteria; Gloeobacteria	lppvk ih csv pa	+
133	Gloeothece sp. KO68DGA: NifU	BAF47150	Bacteria; Cyanobacteria; Oscillatoriophycideae	lpeek mh csv mg	0
134	Gluconacetobacter diazotrophicus PAl 5: Fe-S cluster assembly protein NifU	YP_002275953	Bacteria; Proteobacteria; Alphaproteobacteria	lppek mh csv mg	0
135	Granulicella mallensis MP5ACTX8: FeS cluster assembly scaffold IscU	AEU34848	Bacteria; Acidobacteria; Acidobacteriales	lppvk ih csv la	+
136	Haladaptatus paucihalophilus DX253: iron-sulfur cluster assembly protein	EFW93785	Archaea; Euryarchaeota; Halobacteria	ispmr vk cav la	0
137	Halalkalicoccus jeotgali B3: SUF system FeS assembly protein, NifU family	YP_003735457	Archaea; Euryarchaeota; Halobacteria	ispmr ik cav la	0
138	Halanaerobium hydrogeniformans: NifU family SUF system FeS assembly protein	YP_003995832	Bacteria; Firmicutes; Clostridia	nmpar vk cav ls	0
139	Halarchaeum acidiphilum MH1-52-1: putative iron-sulfur cluster assembly scaffold protein for SUF system, SufE2	GAD52165	Archaea; Euryarchaeota; Halobacteria	vtpmr ik cav la	0
140	Haliscomenobacter hydrossis DSM 1100: FeS cluster assembly scaffold IscU	YP_004446110	Bacteria; Bacteroidetes; Sphingobacteriia	lppvk ih csv la	+
141	Haloarcula amylolytica JCM 13557: NifU-like protein/SUF system FeS assembly protein, NifU family	EMA19536	Archaea; Euryarchaeota; Halobacteria	ispmr vk cav la	0
142	Haloarcula: MULTISPECIES: NifU-like protein	WP_004964685	Archaea; Euryarchaeota; Halobacteria	ispmr vk cav la	0
143	Halobacteriaceae: MULTISPECIES: SUF system FeS assembly protein, NifU family	WP_006182984	Archaea; Euryarchaeota; Halobacteria	vspmr vk cav la	0
144	Halobiforma lacisalsi AJ5: NifU family SUF system FeS assembly protein	EMA34018	Archaea; Euryarchaeota; Halobacteria	ispmr vk cav la	0
145	Halococcus hamelinensis 100A6: SUF system FeS assembly protein, NifU family	EMA40839	Archaea; Euryarchaeota; Halobacteria	ispmr vk cav lv	0
146	Haloferax: MULTISPECIES: FeS assembly protein SufA	WP_004968864	Archaea; Euryarchaeota; Halobacteria	ispmr ik cav la	0
147	Halogeometricum borinquense DSM 11551: suf system fes assembly protein, nifu family	YP_004035165	Archaea; Euryarchaeota; Halobacteria	ispmr ik cav la	0
148	Halogranum salarium B-1: NifU family SUF system FeS assembly protein	EJN59827	Archaea; Euryarchaeota; Halobacteria	ispmr ik cav la	0
149	Halomicrobium katesii: iron-sulfur cluster assembly protein	WP_018257309	Archaea; Euryarchaeota; Halobacteria	ispmr vk cav la	0
150	Halonotius sp. J07HN4: SUF system FeS assembly protein, NifU family	ERH07338	Archaea; Euryarchaeota; Halobacteria	ispmr ip cav lg	0
151	Halopiger xanaduensis SH-6: SUF system FeS assembly protein	YP_004595792	Archaea; Euryarchaeota; Halobacteria	ispmr vk cav la	0
152	Haloquadratum walsbyi C23: iron-sulfur cluster assembly protein	YP_005841266	Archaea; Euryarchaeota; Halobacteria	ispmr ik cav la	0
153	Halorhabdus tiamatea SARL4B: Nitrogen fixation protein	ERJ06092	Archaea; Euryarchaeota; Halobacteria	ispmr vk cav la	0
154	Halorubrum: MULTISPECIES: SUF system FeS assembly protein, NifU family	WP_004597220	Archaea; Euryarchaeota; Halobacteria	ispmr vk cav lg	0
155	Halosarcina pallida JCM 14848: suf system fes assembly protein, nifu family	ELZ30924	Archaea; Euryarchaeota; Halobacteria	ispmr ik cav la	0
156	Halosimplex carlsbadense 2-9-1: NifU-like protein/SUF system FeS assembly protein, NifU family	ELZ29726	Archaea; Euryarchaeota; Halobacteria	ispmr vk cav la	0
157	Haloterrigena limicola JCM 13563: NifU family SUF system FeS assembly protein	ELZ19031	Archaea; Euryarchaeota; Halobacteria	ispmr vk cav la	0
158	Halothece sp. PCC 7418: Fe-S cluster assembly protein NifU	AFZ43953	Bacteria; Cyanobacteria; Oscillatoriophycideae	lpeek mh csv mg	0
159	Halovivax asiaticus JCM 14624: NifU family SUF system FeS assembly protein	ELZ09279	Archaea; Euryarchaeota; Halobacteria	ispmr ik cav la	0
160	Helcococcus kunzii ATCC 51366: NifU family SUF system FeS assembly protein	EHR35630	Bacteria; Firmicutes; Clostridia	klpar vk cav la	0
161	Helicobacter pylori 2017: nifU like protein	ADZ49308	Bacteria; Proteobacteria; Epsilonproteobacteria	vpgqk mh csv ma	0
162	Hippea maritima DSM 10411: nitrogen-fixing NifU domain protein	AEA33362	Bacteria; Proteobacteria; Deltaproteobacteria	fppqk mh csv ma	0
163	human gut metagenome: FeS cluster assembly scaffold protein NifU, Clostridium type	EKC51389	unclassified sequences; metagenomes; organismal metagenomes	lppvk vh csv la	+
164	Hymenobacter aerophilus: FeS cluster assembly scaffold IscU	WP_019948352	Bacteria; Bacteroidetes; Cytophagia	lppvk ih csv la	+
165	Ilumatobacter coccineus YM16-304: iron-sulfur cluster assembly protein IscU	BAN01795	Bacteria; Actinobacteria; Acidimicrobidae	kfpvr ik cav ls	0
166	Ilyobacter polytropus DSM 2926: FeS cluster assembly scaffold protein NifU	YP_003967871	Bacteria; Fusobacteria; Fusobacteriales	lppak mh csv la	+
167	Jonquetella: MULTISPECIES: FeS cluster assembly scaffold IscU	WP_008523408	Bacteria; Synergistetes; Synergistia	lpavk mh csv la	+
168	Kangiella aquimarina: FeS cluster assembly scaffold IscU	WP_018624716	Bacteria; Proteobacteria; Gammaproteobacteria	lppvk ih csv la	+
169	Klebsiella pneumoniae 342: Fe-S cluster assembly protein NifU	ACI07738	Bacteria; Proteobacteria; Gammaproteobacteria	lppek mh csv mg	0
170	Klebsiella: MULTISPECIES: nitrogen fixation protein NifU	WP_016161450	Bacteria; Proteobacteria; Gammaproteobacteria	lppek mh csv mg	0
171	Kosakonia radicincitans DSM 16656: fe-S cluster assembly protein NifU	EJI87731	Bacteria; Proteobacteria; Gammaproteobacteria	lppqk mh csv mg	0
172	Lachnoanaerobaculum saburreum DSM 3986: SUF system FeS assembly protein, NifU family	EFU75609	Bacteria; Firmicutes; Clostridia	hmpar vk cav lg	0
173	Lamprocystis purpurea: FeS cluster assembly scaffold IscU	WP_020502943	Bacteria; Proteobacteria; Gammaproteobacteria	lppvk vh csv la	+
174	Lawsonia intracellularis N343: Fe-S cluster assembly protein NifU	AGC49675	Bacteria; Proteobacteria; Deltaproteobacteria	lprek mh csv mg	0
175	Lentisphaera araneosa HTCC2155: SUF system FeS assembly protein	EDM29106	Bacteria; Lentisphaerae; Lentisphaeria	qfpsr vk cav ls	0
176	Leptolyngbya sp. PCC 7375: Modular FeS cluster scaffolding protein NifU	EKV00059	Bacteria; Cyanobacteria; Oscillatoriophycideae	lpeak mh csv mg	0
177	Leptospira: MULTISPECIES: nitrogen-fixing protein NifU	WP_004753452	Bacteria; Spirochaetes; Spirochaetales	kipar ik cav lp	0
178	Leptospirillum ferrooxidans: NifU	AAO38290	Bacteria; Nitrospirae; Nitrospirales	lppvk ih csv la	+
179	Lewinella persica: FeS cluster assembly scaffold IscU	WP_020570611	Bacteria; Bacteroidetes; Sphingobacteriia	lppvk ih csv la	+
180	Lyngbya sp. PCC 8106: Fe-S cluster assembly protein NifU	EAW37220	Bacteria; Cyanobacteria; Oscillatoriophycideae	lpeek mh csv mg	0
181	Magnetococcus marinus MC-1: FeS cluster assembly scaffold IscU	ABK45552	Bacteria; Proteobacteria; Alphaproteobacteria	lppvk vh csv la	+
182	Magnetospirillum gryphiswaldense MSR-1 v2: scaffold protein	CDK98600	Bacteria; Proteobacteria; Alphaproteobacteria	lppvk ih csv la	+
183	Mahella australiensis 50-1 BON: FeS cluster assembly scaffold protein NifU	AEE96549	Bacteria; Firmicutes; Clostridia	lpaik mh csv la	+
184	Marichromatium purpuratum 984: nitrogen fixation protein NifU	AHF02939	Bacteria; Proteobacteria; Gammaproteobacteria	lpaek mh csv mg	0
185	marine gamma proteobacterium HTCC2080: FeS cluster assembly scaffold IscU	WP_007235996	Bacteria; Proteobacteria; Gammaproteobacteria	lppvk ih csv la	+
186	marine gamma proteobacterium HTCC2148: FeS cluster assembly scaffold IscU	EEB80491	Bacteria; Proteobacteria; Gammaproteobacteria	lppvk Ih csv la	+
187	marine gamma proteobacterium HTCC2207: probable iron-binding protein IscU	EAS46001	Bacteria; Proteobacteria; Gammaproteobacteria	lppvk Ih csv la	+
188	marine metagenome: hypothetical protein GOS_1030955	EDF01075	unclassified sequences; metagenomes; ecological metagenomes	lppvk ih csv la	+
189	Marinobacterium rhizophilum: FeS cluster assembly scaffold IscU	WP_020683723	Bacteria; Proteobacteria; Gammaproteobacteria	lppvk ih csv la	+
190	Mariprofundus ferrooxydans: nitrogen fixation protein NifU	WP_018295173	Bacteria; Proteobacteria; Zetaproteobacteria	lppek mh csv mg	0
191	Mastigamoeba balamuthi: cytosolic scaffold protein, partial	AGA37363	Eukaryota; Amoebozoa; Archamoebae	vppqk mh csv ma	0
192	Megamonas funiformis CAG:377: sUF system FeS assembly protein NifU family	WP_022228601	Bacteria; Firmicutes; Negativicutes	kmpar vk cav ls	0
193	Megasphaera: MULTISPECIES: SUF system FeS assembly protein	WP_020310466	Bacteria; Firmicutes; Negativicutes	nmpar vk cav la	0
194	Methanococcoides burtonii DSM 6242: Nitrogen-fixing NifU-like protein	ABE51292	Archaea; Euryarchaeota; Methanomicrobia	lppvk ah csv la	+
195	Methanocorpusculum labreanum Z: hypothetical protein Mlab_0265	YP_001029708	Archaea; Euryarchaeota; Methanomicrobia	lppnk mh csv la	+
196	Methanofollis liminatans DSM 4140: nitrogen-fixing NifU domain protein	EJG07678	Archaea; Euryarchaeota; Methanomicrobia	lpepk ih csv la	+
197	Methanohalobium evestigatum Z-7303: FeS cluster assembly scaffold protein NifU	ADI74704	Archaea; Euryarchaeota; Methanomicrobia	lpsik mh csv la	+
198	Methanohalophilus mahii DSM 5219: FeS cluster assembly scaffold protein NifU	ADE35913	Archaea; Euryarchaeota; Methanomicrobia	lppvk mh csv la	+
199	Methanolobus psychrophilus R15: nitrogen-fixing NifU domain protein	AFV22422	Archaea; Euryarchaeota; Methanomicrobia	lppvk ah csv la	+
200	Methanomethylovorans hollandica DSM 15978: iron-sulfur cluster biosynthesis protein, NifU-like protein	AGB49406	Archaea; Euryarchaeota; Methanomicrobia	lppvk rh csv la	+
201	Methanoplanus limicola DSM 2279: FeS cluster assembly scaffold protein NifU	EHQ36489	Archaea; Euryarchaeota; Methanomicrobia	lppqk mh csv la	+
202	Methanoplanus petrolearius DSM 11571: FeS cluster assembly scaffold protein NifU	YP_003895855	Archaea; Euryarchaeota; Methanomicrobia	lppqk lh csv la	+
203	Methanoregula boonei 6A8: NifU domain-containing protein	YP_001405283	Archaea; Euryarchaeota; Methanomicrobia	lppik mh csv la	+
204	Methanosarcina acetivorans C2A: NifU family protein	NP_615766	Archaea; Euryarchaeota; Methanomicrobia	lppik ah csv la	+
205	Methanosarcina barkeri str. Fusaro: NifU protein	AAZ70678	Archaea; Euryarchaeota; Methanomicrobia	lppik ah csv la	+
206	Methanosarcina barkeri str. Fusaro: nitrogen fixation protein	AAZ72086	Archaea; Euryarchaeota; Methanomicrobia	lppgk le csv ls	+
207	Methanosarcina barkeri: NifU protein	WP_011306724	Archaea; Euryarchaeota; Methanomicrobia	lppik ah csv la	+
208	Methanosarcina mazei Go1: NifU protein	AAM31650	Archaea; Euryarchaeota; Methanomicrobia	lppik ah csv la	+
209	Methanosphaerula palustris E1-9c: FeS cluster assembly scaffold protein NifU	ACL17142	Archaea; Euryarchaeota; Methanomicrobia	lppik mh csv la	+
210	Methanosphaerula palustris: FeS cluster assembly scaffold IscU	WP_012618461	Archaea; Euryarchaeota; Methanomicrobia	lppik mh csv la	+
211	Methanospirillum hungatei JF-1: nitrogen-fixing NifU-like protein	ABD41919	Archaea; Euryarchaeota; Methanomicrobia	lppik mh csv la	+
212	Methylobacillus flagellatus KT: FeS cluster assembly scaffold IscU	ABE49075	Bacteria; Proteobacteria; Betaproteobacteria	lppvk ih csv la	+
213	Methylobacter marinus: nitrogen fixation protein NifU	WP_020159839	Bacteria; Proteobacteria; Gammaproteobacteria	lppek mh csv mg	0
214	Methylobacter tundripaludum SV96: Fe-S cluster assembly protein NifU	EGW20260	Bacteria; Proteobacteria; Gammaproteobacteria	lppek mh csv mg	0
215	Methylobacterium sp. 4-46: Fe-S cluster assembly protein NifU	ACA17963	Bacteria; Proteobacteria; Alphaproteobacteria	lppek mh csv mg	0
216	Methylocella silvestris BL2: Fe-S cluster assembly protein NifU	ACK52506	Bacteria; Proteobacteria; Alphaproteobacteria	lppek mh cav lg	0
217	Methylococcus capsulatus str. Bath: scaffold protein	YP_112782	Bacteria; Proteobacteria; Gammaproteobacteria	lppvk ih csv la	+
218	Methylocystis parvus: nitrogen fixation protein NifU	WP_016918482	Bacteria; Proteobacteria; Alphaproteobacteria	lppek mh csv mg	0
219	Methylomicrobium alcaliphilum 20Z: nitrogen fixation protein nifU (modular protein)	CCE24052	Bacteria; Proteobacteria; Gammaproteobacteria	lppek mh csv mg	0
220	Methylomicrobium buryatense: nitrogen fixation protein NifU	WP_017842344	Bacteria; Proteobacteria; Gammaproteobacteria	lppek mh csv mg	0
221	Methylomonas methanica MC09: Fe-S cluster assembly protein NifU	YP_004514011	Bacteria; Proteobacteria; Gammaproteobacteria	lppek mh csv mg	0
222	Methylophilaceae bacterium 11: FeS cluster assembly scaffold IscU	EUJ11043	Bacteria; Proteobacteria; Betaproteobacteria	lppvk ih csv la	+
223	Methylophilales bacterium HTCC2181: FeS cluster assembly scaffold IscU	WP_008106806	Bacteria; Proteobacteria; Betaproteobacteria	lppvk ih csv la	+
224	Methylophilus: MULTISPECIES: FeS cluster assembly scaffold IscU	WP_019882635	Bacteria; Proteobacteria; Betaproteobacteria	lppvk ih csv la	+
225	Methylotenera mobilis JLW8: FeS cluster assembly scaffold IscU	ACT48578	Bacteria; Proteobacteria; Betaproteobacteria	lppvk ih csv la	+
226	Methylotenera: MULTISPECIES: FeS cluster assembly scaffold IscU	WP_020166420	Bacteria; Proteobacteria; Betaproteobacteria	lppvk ih csv la	+
227	Methylovorus: MULTISPECIES: FeS cluster assembly scaffold IscU	WP_013442627	Bacteria; Proteobacteria; Betaproteobacteria	lppvk ih csv la	+
228	Methylovulum miyakonense: nitrogen fixation protein NifU	WP_019865066	Bacteria; Proteobacteria; Gammaproteobacteria	lppek mh csv mg	0
229	Microbulbifer agarilyticus: FeS cluster assembly scaffold IscU	WP_010132561	Bacteria; Proteobacteria; Gammaproteobacteria	lppvk ih csv la	+
230	Microchaete sp. PCC 7126: nitrogen fixation protein NifU	WP_017655951	Bacteria; Cyanobacteria; Nostocales	lpeak mh csv mg	0
231	Microcoleus sp. PCC 7113: Modular FeS cluster scaffolding protein NifU	AFZ17179	Bacteria; Cyanobacteria; Oscillatoriophycideae	lpeak mh csv mg	0
232	Mitsuokella multacida DSM 20544: SUF system FeS assembly protein, NifU family	EEX67967	Bacteria; Firmicutes; Negativicutes	nmpar vk cav la	0
233	Mogibacterium sp. CM50: Fe-S iron-sulfur cluster assembly protein, NifU family	EJU20668	Bacteria; Firmicutes; Clostridia	lpark ih csv la	+
234	Moraxella boevrei: FeS cluster assembly scaffold IscU	WP_019518847	Bacteria; Proteobacteria; Gammaproteobacteria	lppvk vh csv la	+
235	Mucilaginibacter paludis DSM 18603: FeS cluster assembly scaffold IscU	EHQ29297	Bacteria; Bacteroidetes; Sphingobacteriia	lppvk ih csv la	+
236	Myxococcus fulvus HW-1: scaffold protein	AEI68464	Bacteria; Proteobacteria; Deltaproteobacteria	lppvk ih csv la	+
237	Myxococcus: MULTISPECIES: FeS cluster assembly scaffold IscU	WP_002634235	Bacteria; Proteobacteria; Deltaproteobacteria	lppvk ih csv la	+
238	Natrialba aegyptia DSM 13077: NifU family SUF system FeS assembly protein	ELZ07004	Archaea; Euryarchaeota; Halobacteria	ispmr vk cav la	0
239	Natrialba: MULTISPECIES: NifU family SUF system FeS assembly protein	WP_006665135	Archaea; Euryarchaeota; Halobacteria	ispmr vk cav la	0
240	Natrinema: MULTISPECIES: SUF system FeS assembly protein, NifU family	WP_008456347	Archaea; Euryarchaeota; Halobacteria	ispmr vk cav la	0
241	Natronobacterium gregoryi SP2: NifU family SUF system FeS assembly protein	YP_007177175	Archaea; Euryarchaeota; Halobacteria	ispmr vk cav la	0
242	Natronococcus amylolyticus DSM 10524: NifU family SUF system FeS assembly protein	ELY59456	Archaea; Euryarchaeota; Halobacteria	ispmr vk cav la	0
243	Natronolimnobius innermongolicus JCM 12255: NifU family SUF system FeS assembly protein	ELY55918	Archaea; Euryarchaeota; Halobacteria	ispmr vk cav la	0
244	Natronomonas moolapensis 8.8.11: iron-sulfur cluster assembly protein	CCQ35768	Archaea; Euryarchaeota; Halobacteria	lspmr ik cav la	0
245	Natronorubrum bangense JCM 10635: NifU family SUF system FeS assembly protein	ELY48792	Archaea; Euryarchaeota; Halobacteria	ispmr vk cav la	0
246	Nautilia profundicola AmH: NifU family protein	ACM92124	Bacteria; Proteobacteria; Epsilonproteobacteria	fppqk mh csv ma	0
247	Neptuniibacter caesariensis: FeS cluster assembly scaffold IscU	EAR59654	Bacteria; Proteobacteria; Gammaproteobacteria	lppvk ih csv la	+
248	Nodosilinea nodulosa: hypothetical protein IscU	WP_017298850	Bacteria; Cyanobacteria; Oscillatoriophycideae	lpeak mh csv mg	0
249	Nodularia spumigena CCY9414: nitrogen fixation protein	EAW47016	Bacteria; Cyanobacteria; Nostocales	lpeak mh csv mg	0
250	Nostoc punctiforme PCC 73102: Fe-S cluster assembly protein NifU	ACC79196	Bacteria; Cyanobacteria; Nostocales	lpeak mh csv mg	0
251	Novosphingobium nitrogenifigens DSM 19370: nitrogen fixation protein nifU	EGD60882	Bacteria; Proteobacteria; Alphaproteobacteria	lppek mh csv mg	0
252	Oceanospirillum sp. MED92: FeS cluster assembly scaffold IscU	EAR59654	Bacteria; Proteobacteria; Gammaproteobacteria	lppvk ih csv la	+
253	Oikopleura dioica: unnamed protein product	CBY39169	Eukaryota; Metazoa; Chordata;	lppvk lh csv la	+	*	sea squirt
254	Oribacterium sinus F0268: SUF system FeS assembly protein, NifU family	EEJ51825	Bacteria; Firmicutes; Clostridia	hmpar vk cav lg	0
255	Pantoea agglomerans: nifU	CAA68019	Bacteria; Proteobacteria; Gammaproteobacteria	lppek mh csv mg	0
256	Pectobacterium atrosepticum SCRI1043: nitrogen fixation protein	YP_051037	Bacteria; Proteobacteria; Gammaproteobacteria	lppek mh csv mg	0
257	Pelobacter carbinolicus DSM 2380: nitrogen fixation iron-sulfur cluster assembly protein NifU	ABA87314	Bacteria; Proteobacteria; Deltaproteobacteria	lpeek mh csv mg	0
258	Pelodictyon phaeoclathratiforme BU-1: nitrogen-fixing NifU domain protein	ACF42695	Bacteria; Chlorobi; Chlorobia	lpdhk ih csv lg	0
259	Pelosinus fermentans A11: SUF system FeS assembly protein, NifU family	EIW25737	Bacteria; Firmicutes; Negativicutes	nmpar vk cav ls	0
260	Peptoclostridium difficile 002-P50-2011: Fe-S iron-sulfur cluster assembly protein, NifU family	EHJ30517	Bacteria; Firmicutes; Clostridia	lppvk mh csv la	+
261	Peptoniphilus harei ACS-146-V-Sch2b: SUF system FeS assembly protein, NifU family	EFR33206	Bacteria; Firmicutes; Clostridia	tlpar vk cav ls	0
262	Peptostreptococcaceae bacterium ACC19a: NifU family SUF system FeS assembly protein	EHL16250	Bacteria; Firmicutes; Clostridia	nmpar vk cav la	0
263	Peptostreptococcus: MULTISPECIES: SUF system FeS assembly protein, NifU family	WP_002845038	Bacteria; Firmicutes; Clostridia	nmpar vk cav la	0
264	Phaeospirillum fulvum MGU-K5: scaffold protein	EPY01927	Bacteria; Proteobacteria; Alphaproteobacteria	lppvk ih csv la	+
265	Phascolarctobacterium succinatutens CAG:287: sUF system FeS assembly protein NifU family	CDD11144	Bacteria; Firmicutes; Negativicutes	hmpar vk cav lg	0
266	planctomycete KSU-1: Fe-S cluster assembly protein	GAB61486	Bacteria; Planctomycetes; Planctomycetia	lpeqk mh csv mg	0
267	Plesiocystis pacifica SIR-1: scaffold protein	EDM74251	Bacteria; Proteobacteria; Deltaproteobacteria	lppvk ih csv la	+
268	Pleurocapsa minor: Fe-S cluster assembly protein NifU	WP_015145431	Bacteria; Cyanobacteria; Pleurocapsales	lpqek mh csv mg	0
269	Pontibacter roseus: FeS cluster assembly scaffold IscU	WP_018478387	Bacteria; Bacteroidetes; Cytophagia	lppvk ih csv la	+
270	Prosthecochloris aestuarii DSM 271: nitrogen-fixing NifU domain protein	ACF47011	Bacteria; Chlorobi; Chlorobia	lpenk ih csv lg	0
271	Pseudanabaena sp. PCC 6802: hypothetical protein iscU	WP_019499569	Bacteria; Cyanobacteria; Oscillatoriophycideae	lpeek mh csv mg	0
272	Pseudoflavonifractor capillosus ATCC 29799: Fe-S iron-sulfur cluster assembly protein, NifU family	EDN02074	Bacteria; Firmicutes; Clostridia	lpghk lh csv la	+
273	Pseudomonas aeruginosa 18A: Iron-sulfur cluster assembly scaffold protein IscU	CCQ86407	Bacteria; Proteobacteria; Gammaproteobacteria	lppvk Ih csv la	+
274	Pseudomonas syringae group: MULTISPECIES: FeS cluster assembly scaffold IscU	WP_007248515	Bacteria; Proteobacteria; Gammaproteobacteria	lppvk ih csv la	+
275	Pseudomonas: MULTISPECIES: FeS cluster assembly scaffold IscU	WP_003227907	Bacteria; Proteobacteria; Gammaproteobacteria	lppvk ih csv la	+
276	Psychrobacter aquaticus CMS 56: Iron-sulfur cluster assembly scaffold protein IscU	ERL55016	Bacteria; Proteobacteria; Gammaproteobacteria	lppvk vh csv la	+
277	Pyramidobacter piscolens W5455: SUF system FeS assembly protein, NifU family	EFB90916	Bacteria; Synergistetes; Synergistia	hmpar vk cav lg	0
278	Rahnella aquatilis CIP 78.65 = ATCC 33071: Fe-S cluster assembly protein NifU	AEX54803	Bacteria; Proteobacteria; Gammaproteobacteria	lppek mh csv mg	0
279	Rhodopseudomonas palustris BisA53: NifU domain-containing protein	YP_783422	Bacteria; Proteobacteria; Alphaproteobacteria	lpder my csv mt	0
280	Rhodospirillum centenum SW: Fe-S cluster assembly protein NifU	ACI97916	Bacteria; Proteobacteria; Alphaproteobacteria	lpaqk mh csv mg	0
281	Richelia intracellularis HH01: Iron-sulfur cluster assembly scaffold protein NifU	CCH66461	Bacteria; Cyanobacteria; Nostocales	lpeak ih csv mg	0
282	Rivularia sp. PCC 7116: Modular FeS cluster scaffolding protein NifU	AFY58699	Bacteria; Cyanobacteria; Nostocales	lpqek mh csv mg	0
283	Roseburia sp. CAG:100: sUF system FeS assembly protein NifU family	WP_022516793	Bacteria; Firmicutes; Clostridia	hmpar vk cav lg	0
284	Ruminococcaceae bacterium D16: FeS cluster assembly scaffold protein NifU	EGJ45438	Bacteria; Firmicutes; Clostridia	lpahk lh csv la	+
285	Ruminococcus bromii L2-63: FeS cluster assembly scaffold protein NifU, Clostridium type	YP_007781362	Bacteria; Firmicutes; Clostridia	lppvk vh csv la	+
286	Ruminococcus: MULTISPECIES: SUF system FeS assembly protein, NifU family	WP_015523703	Bacteria; Firmicutes; Clostridia	hmpar vk cav lg	0
287	Salinarchaeum sp. Harcht-Bsk1: SUF system FeS assembly protein, NifU family	AGN00473	Archaea; Euryarchaeota; Halobacteria	ispmr vk cav la	0
288	Saprospira grandis DSM 2844: FeS cluster assembly scaffold IscU	EJF53355	Bacteria; Bacteroidetes; Sphingobacteriia	lppvk ih csv la	+
289	SAR324 cluster bacterium JCVI-SC AAA005: FeS cluster assembly scaffold IscU	WP_010153844	Bacteria; Proteobacteria; Deltaproteobacteria	lppvk ih csv la	+
290	Scytonema hofmanni: nitrogen fixation protein NifU	WP_017743416	Bacteria; Cyanobacteria; Nostocales	lpeak mh csv mg	0
291	Segetibacter koreensis: FeS cluster assembly scaffold IscU	WP_018613335	Bacteria; Bacteroidetes; Sphingobacteriia	lppvk ih csv la	+
292	Selenomonas artemidis F0399: SUF system FeS assembly protein, NifU family	EFW30380	Bacteria; Firmicutes; Negativicutes	nmpar vk cav la	0
293	Selenomonas: MULTISPECIES: nitrogen-fixing protein NifU	WP_009348613	Bacteria; Firmicutes; Negativicutes	nmpar vk cav la	0
294	Serratia sp. ATCC 39006: Fe-S cluster assembly protein NifU	WP_021017286	Bacteria; Proteobacteria; Gammaproteobacteria	lppek mh csv mg	0
295	Sideroxydans lithotrophicus ES-1: Fe-S cluster assembly protein NifU	ADE11044	Bacteria; Proteobacteria; Betaproteobacteria	lppek mh csv mg	0
296	Solitalea canadensis DSM 3403: FeS cluster assembly scaffold IscU	AFD05898	Bacteria; Bacteroidetes; Sphingobacteriia	lppvk ih csv la	+
297	Sorangium cellulosum So ce56: NifU-like protein	YP_001617979	Bacteria; Proteobacteria; Deltaproteobacteria	lppvk ih csv la	+
298	Sphaerochaeta coccoides DSM 17374: NifU family SUF system FeS assembly protein	YP_004412340	Bacteria; Spirochaetes; Spirochaetales	hmpar vk cav lg	0
299	Stigmatella aurantiaca DW4/3-1: FeS cluster assembly scaffold IscU	ADO73576	Bacteria; Proteobacteria; Deltaproteobacteria	lppvk ih csv la	+
300	Stomatobaculum longum: NifU family SUF system FeS assembly protein	EHO17320	Bacteria; Firmicutes; Clostridia	hmpar vk cav lg	0
301	Streptococcus pneumoniae GA13494: SUF system FeS assembly protein, NifU family	EHD89685	Bacteria; Firmicutes; Bacilli	nletr hs cqv lp	0
302	Subdoligranulum sp. 4_3_54A2FAA: FeS cluster assembly scaffold IscU	WP_009325905	Bacteria; Firmicutes; Clostridia	lppvk lh csv la	+
303	Succinatimonas hippei YIT 12066: Fe-S cluster assembly protein NifU	EFY07437	Bacteria; Proteobacteria; Gammaproteobacteria	lppek mh csv mg	0
304	Succinivibrionaceae bacterium WG-1: Fe-S cluster assembly protein NifU	WP_010455224	Bacteria; Proteobacteria; Gammaproteobacteria	lppek mh csv mg	0
305	sulfur-oxidizing symbionts: MULTISPECIES: FeS cluster assembly scaffold IscU	WP_005962988	Bacteria; Proteobacteria; Gammaproteobacteria	lppvk vh csv la	+
306	Sulfuricella denitrificans skB26: FeS cluster assembly scaffold IscU	BAN35085	Bacteria; Proteobacteria; Betaproteobacteria	lppvk ih csv la	+
307	Sulfuricurvum kujiense DSM 16994: nitrogen-fixing NifU domain protein	ADR35180	Bacteria; Proteobacteria; Epsilonproteobacteria	vppqk mh csv ma	0
308	Sulfurimonas autotrophica DSM 16294: nitrogen-fixing NifU domain protein	ADN10127	Bacteria; Proteobacteria; Epsilonproteobacteria	vppqk mh csv ma	0
309	Sulfurospirillum barnesii SES-3: iron-sulfur cluster biosynthesis protein, NifU-like protein	AFL69581	Bacteria; Proteobacteria; Epsilonproteobacteria	vppqk mh csv ma	0
310	Sulfurovum sp. AR: hypothetical protein SULAR_08502	EIF50509	Bacteria; Proteobacteria; Epsilonproteobacteria	vppqk mh csv ma	0
311	Synechococcus sp. JA-3-3Ab: Fe-S cluster assembly protein NifU	ABC99976	Bacteria; Cyanobacteria; Oscillatoriophycideae	lppak mh csv mg	0
312	Syntrophobacter fumaroxidans MPOB: Fe-S cluster assembly protein NifU	ABK18362	Bacteria; Proteobacteria; Deltaproteobacteria	lpeek mh csv mg	0
313	Syntrophus aciditrophicus SB: iscU protein	ABC76946	Bacteria; Proteobacteria; Deltaproteobacteria	lpqek mh csv lg	0
314	Teredinibacter turnerae T7901: Fe-S cluster assembly protein NifU	ACR14651	Bacteria; Proteobacteria; Gammaproteobacteria	lppek mh csv mg	0
315	Terriglobus roseus DSM 18391: FeS cluster assembly scaffold IscU	AFL90364	Bacteria; Acidobacteria; Acidobacteriales	lppvk ih csv la	+
316	Thermobrachium celere DSM 8682: Iron-sulfur cluster assembly scaffold protein IscU/NifU-like	CDF58262	Bacteria; Firmicutes; Clostridia	lppak mh csv la	+
317	Thermococcus barophilus MP: IscU/NifU-like Fe-S cluster assembly scaffold protein	YP_004071039	Archaea; Euryarchaeota; Thermococci	lpqik yh cav la	0
318	Thermodesulfobium narugense DSM 14796: FeS cluster assembly scaffold protein NifU	YP_004437867	Bacteria; Firmicutes; Clostridia	lppik mh csv la	+
319	Thioalkalivibrio sp. AKL11: FeS cluster assembly scaffold IscU	WP_018941548	Bacteria; Proteobacteria; Gammaproteobacteria	lppvk ih csv la	+
320	Thioalkalivibrio: MULTISPECIES: FeS cluster assembly scaffold IscU	WP_019570778	Bacteria; Proteobacteria; Gammaproteobacteria	lppvk ih csv la	+
321	Thiocapsa marina 5811: Fe-S cluster assembly protein NifU	EGV17131	Bacteria; Proteobacteria; Gammaproteobacteria	lpaek mh csv mg	0
322	Thiocystis violascens DSM 198: Modular FeS cluster scaffolding protein NifU	AFL72547	Bacteria; Proteobacteria; Gammaproteobacteria	lppek mh csv mg	0
323	Thiorhodococcus drewsii AZ1: Fe-S cluster assembly protein NifU	EGV33876	Bacteria; Proteobacteria; Gammaproteobacteria	lppek mh csv mg	0
324	Thiothrix flexilis: FeS cluster assembly scaffold IscU	WP_020560249	Bacteria; Proteobacteria; Gammaproteobacteria	lppvk ih csv la	+
325	Thiovulum sp. ES: iron-sulfur cluster biosynthesis protein, NifU-like protein, partial	EJF07620	Bacteria; Proteobacteria; Epsilonproteobacteria	vpgqk mh csv ma	0
326	Tolumonas auensis DSM 9187: Fe-S cluster assembly protein NifU	YP_002891876	Bacteria; Proteobacteria; Gammaproteobacteria	lppek mh csv mg	0
327	Treponema azotonutricium ZAS-9: IscU protein	AEF82284	Bacteria; Spirochaetes; Spirochaetales	lpefk ih csv lg	0
328	Trichodesmium erythraeum IMS101: Fe-S cluster assembly protein NifU	ABG53143	Bacteria; Cyanobacteria; Oscillatoriophycideae	lpeek mh csv mg	0
329	Trichormus azollae: NifU gene product	AAA87250	Bacteria; Cyanobacteria; Nostocales	lpeak mh csv mg	0
330	Uliginosibacterium gangwonense: hypothetical protein iscu	WP_018609828	Bacteria; Proteobacteria; Betaproteobacteria	lppek mh csv mg	0
331	unclassified Cloacimonetes: MULTISPECIES: hypothetical protein iscU	WP_020251916	Bacteria; Cloacimonetes	lppik mh csv la	+
332	unclassified Gammaproteobacteria (miscellaneous): MULTISPECIES: FeS cluster assembly scaffold IscU	WP_020024863	Bacteria; Proteobacteria; Gammaproteobacteria	lppvk ih csv la	+
333	unclassified Peptostreptococcaceae (miscellaneous): MULTISPECIES: nitrogen-fixing protein NifU	WP_009527253	Bacteria; Firmicutes; Clostridia	nmpar vk cav la	0
334	uncultured archaeon A07HR60: SUF system FeS assembly protein, NifU family	WP_021062729	Archaea; environmental samples	ispmr ik cav lg	0
335	uncultured archaeon: putative NifU-like protein	CBH39419	Archaea; environmental samples	lpees ih cpv la	0
336	uncultured Desulfobacterium sp.: Nitrogen fixation protein nifU	CBX30102	Bacteria; Proteobacteria; Deltaproteobacteria	lpkek mh csv mg	0
337	uncultured haloarchaeon: nitrogen fixation protein NifU	ABQ76085	Archaea; Euryarchaeota; Halobacteria	ispmr ik cav la	0
338	uncultured marine bacterium 580: NifU family protein	AAR38245	Bacteria; environmental samples	lppvk ih csv la	+
339	uncultured Sulfuricurvum sp. RIFRC-1: hypothetical protein iscu	YP_007529343	Bacteria; Proteobacteria; Epsilonproteobacteria	vppqk mh csv ma	0
340	uncultured SUP05 cluster bacterium: probable iron-binding protein IscU	EEZ80344	Bacteria; Proteobacteria; Gammaproteobacteria	lppvk ih csv la	+
341	Veillonella: MULTISPECIES: nitrogen-fixing protein NifU	WP_005379947	Bacteria; Firmicutes; Negativicutes	nmpar vk cav la	0
342	Vibrio natriegens NBRC 15636 = ATCC 14048 = DSM 759: nitrogen fixation protein NifU	EPM41556	Bacteria; Proteobacteria; Gammaproteobacteria	lppek mh csv mg	0
343	Wolbachia endosymbiont of Brugia malayi: FeS cluster assembly scaffold IscU	WP_011256953	Bacteria; Proteobacteria; Alphaproteobacteria	lppvk vh csv la	+
344	Wolbachia: MULTISPECIES: FeS cluster assembly scaffold IscU	WP_007548853	Bacteria; Proteobacteria; Alphaproteobacteria	lppvk ih csv la	+
345	Wolinella succinogenes DSM 1740: NIFU-like protein	NP_908295	Bacteria; Proteobacteria; Epsilonproteobacteria	vpgqk mh csv ma	0
346	Xenococcus sp. PCC 7305: Fe-S cluster assembly protein NifU	ELS00718	Bacteria; Cyanobacteria; Pleurocapsales	lpeek mh csv mg	0
347	Zavarzinella formosa: FeS cluster assembly scaffold IscU	WP_020471642	Bacteria; Planctomycetes; Planctomycetia	lppvk vh csv la	+
348	Zymophilus raffinosivorans: nitrogen-fixing protein NifU	WP_019552144	Bacteria; Firmicutes; Negativicutes	nmpar vk cav ls	0

## Sheet: L at 141
#	L at position 141	accession	organism	12 aa block	aligns	exception	comments
1	: FeS cluster assembly scaffold protein NifU, Clostridium type	YP_007849106	Bacteria; Firmicutes; Clostridia;	lppvk vh csl la	+
2	Acholeplasma sp. CAG:878: sUF system FeS cluster assembly protein	WP_021921773	Bacteria; Tenericutes; Mollicutes;	kqpnr kk cal ls	0
3	Acidovorax delafieldii 2AN: SUF system FeS assembly protein, NifU family	EER60388	Bacteria; Proteobacteria; Betaproteobacteria;	rypsr ik cal lg	0
4	Actinoalloteichus spitiensis: nitrogen fixation protein NifU	WP_016699746	Bacteria; Actinobacteria; Actinobacteridae;	kypar vk cal lg	0
5	actinobacterium SCGC AAA027-L06: iron-sulfur cluster biosynthesis protein, NifU-like protein	EJX35888	Bacteria; Actinobacteria	kfpar ik cal lg	0
6	Actinokineospora enzanensis: nitrogen fixation protein NifU	WP_018686144	Bacteria; Actinobacteria; Actinobacteridae;	kypar vk cal lg	0
7	Actinomadura atramentaria: nitrogen fixation protein NifU	WP_026341749	Bacteria; Actinobacteria; Actinobacteridae;	kypar ik cal lg	0
8	Actinomyces sp. oral taxon 848 str. F0332: SUF system FeS assembly protein, NifU family	EEZ78574	Bacteria; Actinobacteria; Actinobacteridae;	kfpmr ik cal lg	0
9	Actinoplanes sp. N902-109: SUF system FeS assembly protein, NifU family	AGL15690	Bacteria; Actinobacteria; Actinobacteridae;	kypar vk cal lp	0
10	Actinopolyspora halophila: nitrogen fixation protein NifU	WP_017975895	Bacteria; Actinobacteria; Actinobacteridae;	kypmr vk cal lg	0
11	Actinosynnema mirum DSM 43827: SUF system FeS assembly protein, NifU family	ACU38970	Bacteria; Actinobacteria; Actinobacteridae;	kypar vk cal l g	0
12	Adlercreutzia equolifaciens DSM 19450: FeS cluster assembly scaffold protein NifU	YP_008663926	Bacteria; Actinobacteria; Coriobacteridae;	lppvk vh csl la	+
13	Aeromicrobium marinum DSM 15272: SUF system FeS assembly protein, NifU family	EFQ84088	Bacteria; Actinobacteria; Actinobacteridae;	kfpar vk cal lg	0
14	Alcaligenes faecalis subsp. faecalis NCIB 8687: scaffold protein	EJC63142	Bacteria; Proteobacteria; Betaproteobacteria;	lppvk vh cal la	+
15	Alicycliphilus denitrificans BC: SUF system FeS assembly protein, NifU family	ADV00154	Bacteria; Proteobacteria; Betaproteobacteria;	qypsr ik cal lg	0
16	Aminomonas paucivorans DSM 12260: FeS cluster assembly scaffold protein NifU	EFQ24615	Bacteria; Synergistetes; Synergistia;	lppek lh csl la	+
17	Amycolatopsis alba: nitrogen fixation protein NifU	WP_020637163	Bacteria; Actinobacteria; Actinobacteridae;	kypar vk cal lg	0
18	Amycolatopsis: MULTISPECIES: nitrogen fixation protein NifU	WP_017982994	Bacteria; Actinobacteria; Actinobacteridae;	kypar vk cal lg	0
19	Amycolicicoccus subflavus DQS3-9A1: Possible SUF system FeS assembly protein	AEF40356	Bacteria; Actinobacteria; Actinobacteridae;	kypar vk cal lg	0
20	Anaerobaculum hydrogeniformans ATCC BAA-1850: Fe-S iron-sulfur cluster assembly protein, NifU family	EFD25451	Bacteria; Synergistetes; Synergistia;	lppqk vh csl la	+
21	Anaerolinea thermophila UNI-1: SUF system FeS assembly protein	YP_004174419	Bacteria; Chloroflexi; Anaerolineae;	lgpvr lk cal ls	0
22	Anaerostipes caccae DSM 14662: Fe-S iron-sulfur cluster assembly protein, NifU family	EDR99140	Bacteria; Firmicutes; Clostridia;	lppvk vh csl la	+
23	Anaerostipes: MULTISPECIES: FeS cluster assembly scaffold IscU	WP_006565901	Bacteria; Firmicutes; Clostridia;	lppvk vh csl la	+
24	Anaplasma centrale str. Israel: scaffold protein	ACZ49231	Bacteria; Proteobacteria; Alphaproteobacteria;	lppvk ih csl la	+
25	Anaplasma marginale: scaffold protein		Bacteria; Proteobacteria; Alphaproteobacteria;	lppvk ih csl la	+
26	Anaplasma: MULTISPECIES: FeS cluster assembly scaffold IscU	WP_010267658	Bacteria; Proteobacteria; Alphaproteobacteria;	lppvk ih csl la	+
27	Aspergillus nidulans FGSC A4: hypothetical protein AN4655.2	XP_662259	Eukaryota; Fungi; Dikarya;	lppvk lh csl la	+	*	fungi
28	Babesia bovis T2Bo: iron sulfur cluster assembly protein nifU-like	XP_001610334	Eukaryota; Alveolata; Apicomplexa;	lppvk vh csl la	+	*	apicomplexa
29	Bacillus licheniformis 9945A: Fe-S cluster formation protein NifU	AGN36374	Bacteria; Firmicutes; Bacilli;	plrar hn cal mp	0
30	Bacillus methanolicus MGA3: nitrogen fixation protein	AIE58900	Bacteria; Firmicutes; Bacilli;	qlkar hn cal mt	0
31	Bacteria: MULTISPECIES: hypothetical protein IscU	WP_018039412	Archaea	tspvr ik cal ls	0
32	Bifidobacterium adolescentis ATCC 15703: hypothetical protein BAD_0714	YP_909577	Bacteria; Actinobacteria; Actinobacteridae;	qypmr ik cal lg	0
33	Blastocystis sp. NandII: mitochondrial IscU	AFL03349	Eukaryota; Stramenopiles; Blastocystis	lppvk lh csl la	+	*	anaerobic parasite
34	Blautia hansenii DSM 20583: Fe-S iron-sulfur cluster assembly protein, NifU family	EEX22244	Bacteria; Firmicutes; Clostridia;	lppvk vh csl la	+
35	Brachybacterium faecium DSM 4810: SUF system FeS assembly protein, NifU family	ACU85492	Bacteria; Actinobacteria; Actinobacteridae;	kfpar vk cvl mp	0
36	Burkholderia mallei 2002721280: SUF system FeS assembly protein, NifU family	EDK84916	Bacteria; Proteobacteria; Betaproteobacteria;	rypsr ik cal lg	0
37	Burkholderia thailandensis: nitrogen fixation protein NifU	WP_019255307	Bacteria; Proteobacteria; Betaproteobacteria;	rypsr ik cal lg	0
38	butyrate-producing bacterium SM4/1: FeS cluster assembly scaffold protein NifU, Clostridium type	CBL36827	Bacteria; Firmicutes; Clostridia;	lppvk vh csl la	+
39	Butyrivibrio crossotus CAG:259: feS cluster assembly scaffold protein NifU	CCY75545	Bacteria; Firmicutes; Clostridia;	lppvk vh csl la	+
40	Butyrivibrio: MULTISPECIES: FeS cluster assembly scaffold IscU	WP_005602574	Bacteria; Firmicutes; Clostridia;	lppvk vh csl la	+
41	Caldanaerobacter subterraneus subsp. yonseiensis KB-1: nitrogen-fixing protein NifU	ERM92136	Bacteria; Firmicutes; Clostridia;	dfpar vk cal la	0
42	Caldilinea aerophila DSM 14535 = NBRC 104270: putative SUF system FeS assembly protein	YP_005441975	Bacteria; Chloroflexi; Caldilineae;	igpvr lk cal lp	0
43	candidate division ZIXI bacterium RBG-1: Fe-S cluster assembly protein NifU	EQB63161	Bacteria	kypvr ik cal la	0
44	Candidatus Acetothermus autotrophicum: NifU family SUF system FeS assembly protein	BAL60138	Bacteria; Acetothermia; Candidatus Acetothermum	imlsr pr cal la	0
45	Candidatus Rickettsia amblyommii str. GAT-30V: scaffold protein	AFC69912	Bacteria; Proteobacteria; Alphaproteobacteria;	lppvk lh csl la	+
46	Catelliglobosispora koreensis: hypothetical protein IscU	WP_020521152	Bacteria; Actinobacteria; Actinobacteridae;	kfpar vk cal ls	0
47	Catenulispora acidiphila DSM 44928: NifU family SUF system FeS assembly protein	YP_003113027	Bacteria; Actinobacteria; Actinobacteridae;	kypgr vk cal ls	0
48	Cellulomonas fimi ATCC 484: SUF system FeS assembly protein, NifU family	YP_004453217	Bacteria; Actinobacteria; Actinobacteridae;	rysar vk cal lg	0
49	Cellulosilyticum lentocellum: FeS cluster assembly scaffold IscU	WP_013657820	Bacteria; Firmicutes; Clostridia;	lppvk mh csl la	+
50	Cenarchaeum symbiosum A: Fe-S cluster formation protein	ABK77972	Archaea; Thaumarchaeota; Cenarchaeales;	lqavr ik cal ls	0
51	Chloroflexus: MULTISPECIES: Fe-S cluster protein	WP_012259321	Bacteria; Chloroflexi; Chloroflexia;	hnptr lk cal ls	0
52	Cloacibacillus evryensis DSM 19522: iron-sulfur cluster biosynthesis protein, NifU-like protein	EXG78703	Bacteria; Synergistetes; Synergistia;	lppvk lh csl la	+
53	Clostridiales bacterium 1_7_47FAA: Fe-S iron-sulfur cluster assembly protein, NifU family	EEQ60151	Bacteria; Firmicutes; Clostridia;	lppvk vh csl la	+
54	Clostridiales: MULTISPECIES: FeS cluster assembly scaffold protein NifU, Clostridium type	WP_015519267	Bacteria; Firmicutes; Clostridia	lppak lh csv la	+
55	Clostridium asparagiforme DSM 15981: Fe-S iron-sulfur cluster assembly protein, NifU family	EEG55840	Bacteria; Firmicutes; Clostridia;	lppvk ih csl la	+
56	Clostridium clostridioforme 2_1_49FAA: FeS cluster assembly scaffold protein NifU	EHG27439	Bacteria; Firmicutes; Clostridia; Clostridiales;	lppvk vh csl la	+
57	Clostridium hathewayi 12489931: FeS cluster assembly scaffold protein NifU	ENY98201	Bacteria; Firmicutes; Clostridia;	lppvk vh csl la	+
58	Clostridium hylemonae DSM 15053: Fe-S iron-sulfur cluster assembly protein, NifU family	EEG73133	Bacteria; Firmicutes; Clostridia;	lppvk vh csl la	+
59	Clostridium lentocellum DSM 5427: FeS cluster assembly scaffold protein NifU	ADZ84539	Bacteria; Firmicutes; Clostridia;	lppvk mh csl la	+
60	Clostridium nexile DSM 1787: Fe-S iron-sulfur cluster assembly protein, NifU family	EEA81156	Bacteria; Firmicutes; Clostridia;	lppvk vh csl la	+
61	Clostridium phytofermentans ISDg: FeS cluster assembly scaffold protein NifU	YP_001560003	Bacteria; Firmicutes; Clostridia;	lpavk vh csl la	+
62	Clostridium saccharolyticum WM1: FeS cluster assembly scaffold protein NifU	ADL05823	Bacteria; Firmicutes; Clostridia;	lppvk vh csl la	+
63	Clostridium scindens ATCC 35704: Fe-S iron-sulfur cluster assembly protein, NifU family	EDS07591	Bacteria; Firmicutes; Clostridia;	lppvk vh csl la	+
64	Clostridium sp. 7_3_54FAA: FeS cluster assembly scaffold protein NifU	EHF07732	Bacteria; Firmicutes; Clostridia;	lppvk vh csl la	+
65	Clostridium sp. ASF502: FeS cluster assembly scaffold protein NifU	WP_004068444	Bacteria; Firmicutes; Clostridia;	lppvk vh csl la	+
66	Clostridium sp. CAG:1219: sUF system FeS assembly protein NifU family	WP_022028721	Bacteria; Firmicutes; Clostridia;	nmpa rvk cal la	0
67	Clostridium sp. CAG:122: nifU protein	CCZ42912	Bacteria; Firmicutes; Clostridia;	lppvk vh csl la	+
68	Clostridium sp. CAG:127: feS cluster assembly scaffold protein NifU	WP_021985154	Bacteria; Firmicutes; Clostridia;	lppvk vh csl la	+
69	Clostridium: MULTISPECIES: FeS cluster assembly scaffold protein NifU	WP_022044805	Bacteria; Firmicutes; Clostridia;	lppvk vh csl la	+
70	Conexibacter woesei DSM 14684: nitrogen-fixing NifU domain protein	ADB53801	Bacteria; Actinobacteria; Rubrobacteridae;	isatr mk cal ls	0
71	Coprococcus catus GD/7: FeS cluster assembly scaffold protein NifU, Clostridium type	YP_007770008	Bacteria; Firmicutes; Clostridia;	lppvk vh csl la	+
72	Coprococcus: MULTISPECIES: FeS cluster assembly scaffold IscU	WP_008372281	Bacteria; Firmicutes; Clostridia;	lppvk vh csl la	+
73	Corynebacterium: MULTISPECIES: nitrogen fixation protein NifU	WP_005279143	Bacteria; Actinobacteria; Actinobacteridae;	qypar vk cal lg	0
74	Cryptococcus neoformans var. neoformans: iron-sulfur cluster Isu1-like protein	AAQ98966	Eukaryota; Fungi; Dikarya;	lppvk lh csl la	+	*	fungi, human pathogen
75	Cryptosporidium hominis TU502: IscU-like protein	XP_668089	Eukaryota; Alveolata; Apicomplexa;	lppik lh csl la	+	*	apicomplexa
76	Dehalobacter sp. UNSWDHB: Iron-sulfur cluster assembly scaffold protein IscU	WP_021315128	Bacteria; Firmicutes; Clostridia;	lpehk rh csl lg	0
77	Dermabacter sp. HFH0086: NifU family SUF system FeS assembly protein	WP_016664504	Bacteria; Actinobacteria; Actinobacteridae;	kfpgr vk cvl mp	0
78	Dermacoccus sp. Ellin185: SUF system FeS assembly protein, NifU family	EFP58071	Bacteria; Actinobacteria; Actinobacteridae;	qypar vk cal ls	0
79	Desulfotomaculum carboxydivorans CO-1-SRB: nitrogen-fixing NifU domain protein	AEF93210	Bacteria; Firmicutes; Clostridia;	lpeqk kh csl lg	0
80	Desulfurispora thermophila: hypothetical protein	WP_018086605	Bacteria; Firmicutes; Clostridia;	lperk kh csl la	+
81	Dietzia alimentaria: nitrogen fixation protein NifU	WP_010541729	Bacteria; Actinobacteria; Actinobacteridae;	rypar vk cal lg	0
82	Dorea: MULTISPECIES: FeS cluster assembly scaffold IscU	WP_006427601	Bacteria; Firmicutes; Clostridia;	lppvk vh csl la	+
83	Eggerthella sp. CAG:368: feS cluster assembly scaffold protein NifU	WP_022369969	Bacteria; Actinobacteria; Coriobacteridae;	lppvk vh csl la	+
84	Ehrlichia canis str. Jake: Nitrogen-fixing NifU-like, N-terminal	AAZ68452	Bacteria; Proteobacteria; Alphaproteobacteria;	lppvk ih csl la	+
85	Eimeria tenella: hypothetical protein	AET50677	Eukaryota; Alveolata; Apicomplexa;	lppvk ih csl la	+	*	apicomplexa
86	Enterorhabdus caecimuris B7: FeS cluster assembly scaffold protein NifU	EOS53703	Bacteria; Actinobacteria; Coriobacteridae;	lppvk vh csl la	+
87	environmental samples: MULTISPECIES: feS cluster assembly scaffold protein NifU Clostridium type	WP_022044805	Bacteria; Firmicutes; Clostridia;	lppvk vh csl la	+
88	Eubacterium plexicaudatum ASF492: FeS cluster assembly scaffold protein NifU	EMZ27861	Bacteria; Firmicutes; Clostridia;	lppvk vh csl la	+
89	Eubacterium rectale ATCC 33656: NifU protein	ACR74112	Bacteria; Firmicutes; Clostridia;	lppvk vh csl la	+
90	Eubacterium: MULTISPECIES: FeS cluster assembly scaffold IscU	WP_012741233	Bacteria; Firmicutes; Clostridia;	lppvk vh csl la	+
91	euryarchaeote SCGC AAA261-G15: hypothetical protein iscu	WP_018035181	Archaea; Euryarchaeota	vspgr ig cvl lp	0
92	Exiguobacterium sp. S17: SUF system FeS assembly protein, NifU family	EPE63469	Bacteria; Firmicutes; Bacilli;	qlrar hn cal mt	0
93	Firmicutes: MULTISPECIES: nifU protein	WP_022154150	Bacteria	lppvk vh csl la	+
94	Frankia: MULTISPECIES: nitrogen fixation protein NifU	WP_011436104	Bacteria; Actinobacteria; Actinobacteridae;	kypar vk cal ls	0
95	Gardnerella vaginalis: SUF system FeS assembly protein, NifU family	WP_020973350	Bacteria; Actinobacteria; Actinobacteridae;	kypmr ik cal la	0
96	Gordonia aichiensis NBRC 108223: iron-sulfur cluster assembly protein IscU	GAC48363	Bacteria; Actinobacteria; Actinobacteridae;	kypar vk cal lg	0
97	Herpetosiphon aurantiacus DSM 785: NifU family SUF system FeS assembly protein	YP_001543187	Bacteria; Chloroflexi; Chloroflexia;	igpvr lk cal ls	0
98	Hydrocarboniphaga effusa AP103: hypothetical protein WQQ_29580	EIT69376	Bacteria; Proteobacteria; Gammaproteobacteria;	ipedr ah cal mg	0
99	Intrasporangium calvum DSM 43043: NifU family SUF system FeS assembly protein	YP_004098948	Bacteria; Actinobacteria; Actinobacteridae;	kypar vk cal lg	0
100	Isoptericola variabilis 225: NifU family SUF system FeS assembly protein	YP_004542034	Bacteria; Actinobacteria; Actinobacteridae;	qypar ik cal lg	0
101	Jonesia denitrificans DSM 20603: NifU family SUF system FeS assembly protein	YP_003161104	Bacteria; Actinobacteria; Actinobacteridae;	kfpar ik cal lg	0
102	Kyrpidia tusciae DSM 2912: NifU family SUF system FeS assembly protein	YP_003588485	Bacteria; Firmicutes; Bacilli;	kfpar vk cal la	0
103	Lachnospiraceae bacterium 1_1_57FAA: FeS cluster assembly scaffold protein NifU	EGN47635	Bacteria; Firmicutes; Clostridia;	lppvk vh csl la	+
104	Longispora albida: hypothetical protein	WP_018350727	Bacteria; Actinobacteria; Actinobacteridae;	kypar vk cal lp	0
105	Marvinbryantia formatexigens DSM 14469: Fe-S iron-sulfur cluster assembly protein, NifU family	EET59263	Bacteria; Firmicutes; Clostridia;	lppvk vh csl la	+
106	Methylacidiphilum fumariolicum SolV: NifU-like protein involved in Fe-S cluster formation	CCG92108	Bacteria; Verrucomicrobia; unclassified Verrucomicrobia	hfpar vk cal lp	0
107	Microlunatus phosphovorus NM-1: iron-sulfur cluster assembly protein IscU	YP_004571871	Bacteria; Actinobacteria; Actinobacteridae;	kfpar vk cal lg	0
108	Micromonospora aurantiaca ATCC 27029: SUF system FeS assembly protein, NifU family	ADL47826	Bacteria; Actinobacteria; Actinobacteridae;	rypar vk cal ls	0
109	Micromonospora: MULTISPECIES: nitrogen fixation protein NifU	WP_013287442	Bacteria; Actinobacteria; Actinobacteridae;	rypar vk cal ls	0
110	Mobilicoccus pelagius NBRC 104925: iron-sulfur cluster assembly protein IscU	GAB49081	Bacteria; Actinobacteria; Actinobacteridae;	qypar vk cal lg	0
111	Mobiluncus curtisii ATCC 43063: putative iron-sulfur (Fe-S) cluster formation protein IscU	YP_003719690	Bacteria; Actinobacteria; Actinobacteridae;	ryvnr vk cal lg	0
112	Mycobacterium avium 05-4293: nitrogen fixation protein NifU	ETA94163	Bacteria; Actinobacteria; Actinobacteridae;	kypar vk cal lg	0
113	Mycobacterium tuberculosis '98-R604 INH-RIF-EM': nitrogen fixation related protein	EPZ64464	Bacteria; Actinobacteria; Actinobacteridae;	kypar vk cal lg	0
114	Naegleria gruberi: Fe-S cluster biogenesis scaffold protein	EFC46190	Eukaryota; Heterolobosea; Schizopyrenida;	lppvk kh csl la	+	*	amoeba
115	Nakamurella multipartita DSM 44233: NifU family SUF system FeS assembly protein	YP_003201646	Bacteria; Actinobacteria; Actinobacteridae;	kypar vk cal lg	0
116	Nematocida parisii ERTm1: FeS cluster assembly scaffold IscU	EIJ94888	Eukaryota; Fungi; Microsporidia;	lppvk lh csl la	+	*	fungi, microsporidia
117	Neospora caninum Liverpool: Nifu-pending protein, related	XP_003884733	Eukaryota; Alveolata; Apicomplexa;	lppvk vh csl la	+	*
118	Nitrolancea hollandica Lb: iron-sulfur cluster assembly scaffold protein	CCF85463	Bacteria; Chloroflexi; Sphaerobacteridae;	ispar vk cal lg	0
119	Nitrosopumilaceae: MULTISPECIES: Fe-S cluster protein	WP_014962799	Archaea; Thaumarchaeota; Nitrosopumilales;	lqavr ik cal ls	0
120	Nitrosopumilus maritimus SCM1: NifU family SUF system FeS assembly protein	YP_001581832	Archaea; Thaumarchaeota; Nitrosopumilales;	lqavr ik cal ls	0
121	Nocardia asteroides NBRC 15531: iron-sulfur cluster assembly protein IscU	GAD84185	Bacteria; Actinobacteria; Actinobacteridae;	kypar vk cal lg	0
122	Nocardioidaceae bacterium Broad-1: nitrogen fixation protein NifU	WP_008357125	Bacteria; Actinobacteria; Actinobacteridae;	kfpar ik cal ls	0
123	Nocardiopsis: MULTISPECIES: nitrogen fixation protein NifU	WP_017541654	Bacteria; Actinobacteria; Actinobacteridae;	kypar ik cal la	0
124	Nonomuraea coxensis: nitrogen fixation protein NifU	WP_020544806	Bacteria; Actinobacteria; Actinobacteridae;	kfpar vk cal ls	0
125	Oscillochloris trichoides DG6: NifU family SUF system FeS assembly protein	EFO80658	Bacteria; Chloroflexi; Chloroflexia;	knpvr lk cal ls	0
126	Paenibacillus senegalensis: NifU family SUF system FeS assembly protein	WP_010275550	Bacteria; Firmicutes; Bacilli;	slkar hn cal mg	0
127	Patulibacter medicamentivorans: Fe-S cluster protein	WP_007579155	Bacteria; Actinobacteria; Rubrobacteridae;	isatr vk cal ls	0
128	Peptoclostridium difficile F501: nifU-like N terminal domain protein	EQI11831	Bacteria; Firmicutes; Clostridia;	pcmic eh csl rs	0
129	Pirellula staleyi DSM 6068: NifU family SUF system FeS assembly protein	YP_003369853	Bacteria; Planctomycetes; Planctomycetia;	tpnrq kc cll sw	0
130	Planctomyces limnophilus DSM 3776: nitrogen-fixing NifU domain protein	ADG67155	Bacteria; Planctomycetes; Planctomycetia;	ltasr qk cgl la	0
131	Planococcus antarcticus DSM 14505: nitrogen fixation protein	EIM05921	Bacteria; Firmicutes; Bacilli;	klkar hn cal mt	0
132	Plasmodium falciparum 3D7: nifU protein, putative	AAN37131	Eukaryota; Alveolata; Apicomplexa;	lppvk ih csl la	+	*	apicomplexa, human pathogen
133	Plasmodium vivax: nifU protein, putative	EDL46118	Eukaryota; Alveolata; Apicomplexa;	lppvk ih csl la	+	*	apicomplexa, human pathogen
134	Plasmodium yoelii 17X: FeS cluster assembly scaffold IscU	ETB56135	Eukaryota; Alveolata; Apicomplexa;	lppvk ih csl la	+	*	apicomplexa
135	Promicromonospora sukumoe: SUF system FeS assembly protein, NifU family	WP_020012946	Bacteria; Actinobacteria; Actinobacteridae;	qypar ik cal lg	0
136	pseudomallei group: MULTISPECIES: nitrogen fixation protein NifU	WP_004192846	Bacteria; Proteobacteria; Betaproteobacteria;	rypsr ik cal lg	0
137	Pseudonocardia dioxanivorans CB1190: NifU family SUF system FeS assembly protein	YP_004333436	Bacteria; Actinobacteria; Actinobacteridae;	kypar vk cal lg	0
138	Rhodococcus: MULTISPECIES: nitrogen fixation protein NifU	WP_020110105	Bacteria; Actinobacteria; Actinobacteridae;	kypar vk cal lg	0
139	Rhodopirellula baltica SH 1: nitrogen fixation protein NifU	NP_865599	Bacteria; Planctomycetes; Planctomycetia;	tpnrq kc cll sw	0
140	Rickettsia africae ESF-5: FeS cluster assembly scaffold IscU	ACP53569	Bacteria; Proteobacteria; Alphaproteobacteria;	lppvk lh csl la	+
141	Rickettsia prowazekii str. Breinl: NFS1 nitrogen fixation 1 isoform CRA_b	AGJ02352	Bacteria; Proteobacteria; Alphaproteobacteria;	lppvk lh csl la	+
142	Rickettsia rickettsii: FeS cluster assembly scaffold IscU	WP_014362912	Bacteria; Proteobacteria; Alphaproteobacteria;	lppvk lh csl la	+
143	Rickettsia typhi: FeS cluster assembly scaffold IscU	WP_011190928	Bacteria; Proteobacteria; Alphaproteobacteria;	lppvk lh csl la	+
144	Roseburia: MULTISPECIES: FeS cluster assembly scaffold IscU	WP_007888354	Bacteria; Firmicutes; Clostridia;	lppvk vh csl la	+
145	Roseiflexus castenholzii DSM 13941: NifU family SUF system FeS assembly protein	YP_001430458	Bacteria; Chloroflexi; Chloroflexia;	hnpvr ik cal lp	0
146	Ruminococcus: MULTISPECIES: FeS cluster assembly scaffold IscU	WP_015526995	Bacteria; Firmicutes; Clostridia;	lppvk ih csl la	+
147	Saccharomonospora azurea NA-128: SUF system FeS assembly protein, NifU family	EHY87090	Bacteria; Actinobacteria; Actinobacteridae;	kypar vk cal lg	0
148	Saccharopolyspora erythraea D: nitrogen fixation protein NifU	EQD87524	Bacteria; Actinobacteria; Actinobacteridae;	kypmr vk cal lg	0
149	Saccharothrix espanaensis DSM 44229: SUF system FeS assembly protein, NifU family	YP_007040350	Bacteria; Actinobacteria; Actinobacteridae;	kypar vk cal lg	0
150	Salinispora arenicola CNS-205: NifU family SUF system FeS assembly protein	YP_001538099	Bacteria; Actinobacteria; Actinobacteridae;	rypar vk cal lp	0
151	Schlesneria paludicola: nitrogen fixation protein NifU	WP_010585892	Bacteria; Planctomycetes; Planctomycetia;	ltasr qk cgl lg	0
152	Sciscionella marina: nitrogen fixation protein NifU	WP_020497736	Bacteria; Actinobacteria; Actinobacteridae;	kypar vk cal lg	0
153	Segniliparus rotundus DSM 44985: NifU family SUF system FeS assembly protein	YP_003659605	Bacteria; Actinobacteria; Actinobacteridae;	kypar vk cal lg	0
154	Singularimonas variicoloris: hypothetical protein	WP_020648572	Bacteria; Proteobacteria; Gammaproteobacteria;	ipedk ah cal mg	0
155	Singulisphaera acidiphila DSM 18658: iron-sulfur cluster biosynthesis protein, NifU-like protein	AGA25617	Bacteria; Planctomycetes; Planctomycetia;	llvrr qq cal la	0
156	Slackia piriformis YIT 12062: FeS cluster assembly scaffold protein NifU	EJZ84723	Bacteria; Actinobacteria; Coriobacteridae;	lppvk mh csl la	+
157	Smaragdicoccus niigatensis: nitrogen fixation protein NifU	WP_026306778	Bacteria; Actinobacteria; Actinobacteridae;	kypar vk cal lg	0
158	Sphaerobacter thermophilus DSM 20745: NifU family SUF system FeS assembly protein	YP_003319783	Bacteria; Chloroflexi; Sphaerobacteridae;	ispar vk cal lg	0
159	Spironucleus salmonicida: nifU-like protein	EST48017	Eukaryota; Diplomonadida; Hexamitidae;	lppvk lh csl la	+	*	fish pathogen
160	Sporichthya polymorpha: nitrogen fixation protein NifU	WP_019877390	Bacteria; Actinobacteria; Actinobacteridae;	kypar ik cal ls	0
161	spotted fever group: MULTISPECIES: FeS cluster assembly scaffold IscU	WP_014014436	Bacteria; Proteobacteria; Alphaproteobacteria;	lppvk lh csl la	+
162	Streptomyces acidiscabies: nitrogen fixation protein NifU	WP_010352446	Bacteria; Actinobacteria; Actinobacteridae;	kypar vk cal ls	0
163	Streptomyces: MULTISPECIES: nitrogen fixation protein NifU	WP_031019827	Bacteria; Actinobacteria; Actinobacteridae;	kypar vk cal ls	0
164	Streptosporangium roseum DSM 43021: nitrogen fixation protein	ACZ88716	Bacteria; Actinobacteria; Actinobacteridae;	kfpar vk cal la	0
165	Synergistes sp. 3_1_syn1: FeS cluster assembly scaffold IscU	WP_008710778	Bacteria; Synergistetes; Synergistia;	lppvk lh csl la	+
166	Talaromyces marneffei ATCC 18224: iron-sulfur cofactor synthesis protein (Isu1), putative	EEA18708	Eukaryota; Fungi; Dikarya;	lppvk lh csl la	+	*
167	Terracoccus sp. 273MFTsu3.1: SUF system FeS assembly protein, NifU family	WP_020144128	Bacteria; Actinobacteria; Actinobacteridae;	kypar vk cal lg	0
168	Tetrasphaera elongata Lp2: iron-sulfur cluster assembly scaffold protein	CCH68624	Bacteria; Actinobacteria; Actinobacteridae;	kypar vk cal ls	0
169	Theileria orientalis strain Shintoku: NifU protein	BAM38711	Eukaryota; Alveolata; Apicomplexa;	lppvk ih csl la	+	*	apicomplexa, 325 amino acids
170	Theileria parva: NifU protein, putative	EAN33436	Eukaryota; Alveolata; Apicomplexa;	lppvk ih csl la	+	*	apicomplexa, 301 amino acids
171	Thermaerobacter marianensis DSM 12885: NifU family SUF system FeS assembly protein	YP_004100965	Bacteria; Firmicutes; Clostridia;	lspvr lk cal la	0
172	Thermanaerovibrio acidaminovorans DSM 6589: FeS cluster assembly scaffold protein NifU	ACZ18445	Bacteria; Synergistetes; Synergistia;	lppek vh csl la	+
173	Thermoanaerobacter brockii subsp. finnii Ako-1: SUF system FeS assembly protein	YP_004186861	Bacteria; Firmicutes; Clostridia;	dfpar vk cal la	0
174	Thermoanaerobacter ethanolicus CCSD1: SUF system FeS assembly protein, NifU family	EEU62955	Bacteria; Firmicutes; Clostridia;	dfpar ik cal la	0
175	Thermobaculum terrenum ATCC BAA-798: NifU family SUF system FeS assembly protein	YP_003323423	Bacteria; Thermobaculum	lspvr vk cal ls	0
176	Thermobifida fusca TM51: SUF system FeS assembly protein	EOR70947	Bacteria; Actinobacteria; Actinobacteridae;	kypar vk cal la	0
177	Thermomicrobium roseum DSM 5159: NifU family SUF system FeS assembly protein	YP_002521626	Bacteria; Chloroflexi; Thermomicrobiales;	ispar rk cal ls	0
178	Thermomonospora curvata DSM 43183: SUF system FeS assembly protein, NifU family	ACY97795	Bacteria; Actinobacteria; Actinobacteridae;	kypar vk cal la	0
179	Thermoplasmatales archaeon A-plasma: SUF system FeS assembly protein, NifU family	WP_021795329	Archaea; Euryarchaeota; Thermoplasmata;	lgpsr ek cal lp	0
180	Thermotoga neapolitana DSM 4359: NifU-like protein	ACM23395	Bacteria; Thermotogae; Thermotogales;	nypar vk cfl la	0
181	Thermovirga lienii DSM 17291: FeS cluster assembly scaffold protein NifU	AER66253	Bacteria; Synergistetes; Synergistia;	lppqk ih csl la	+
182	Toxoplasma gondii GT1: iron-sulfur cluster protein ISCU	EPR60137	Eukaryota; Alveolata; Apicomplexa;	lppvk vh csl la	+	*	apicomplexa, human pathogen
183	Tremella mesenterica DSM 1558: hypothetical protein TREMEDRAFT_43762	XP_007004003	Eukaryota; Fungi; Dikarya;	lppvk lh csl la	+	*	fungi, digests lignin
184	Tsukamurella paurometabola DSM 20162: NifU family SUF system FeS assembly protein	YP_003647448	Bacteria; Actinobacteria; Actinobacteridae;	kypar vk cal lg	0
185	Turicella otitidis ATCC 51513: NifU family SUF system FeS assembly protein	EJZ82465	Bacteria; Actinobacteria; Actinobacteridae;	kypar vk cal lg	0
186	unclassified Crenarchaeota (miscellaneous): MULTISPECIES: hypothetical protein	WP_018031228	Archaea; Crenarchaeota	lgpsr ik cal lp	0
187	uncultured Acetothermia bacterium: NifU family SUF system FeS assembly protein	BAL56320	Bacteria; Acetothermia; environmental samples	imlsr pr cal la	0
188	uncultured bacterium: hypothetical protein ACD_58C00219G0001	EKD56338	Bacteria; environmental samples	lppvk mh csl la	+
189	uncultured bacterium: hypothetical protein ACD_64C00342G0003	EKD48383	Bacteria; environmental samples	lgptr lk cal lp	0
190	uncultured bacterium: hypothetical protein ACD_72C00061G0001	EKD43949	Bacteria; environmental samples	ispgr vk cal lg	0
191	uncultured bacterium: NifU protein	EKD83245	Bacteria; environmental samples	lpesk ih csl la	+
192	uncultured Chloroflexi bacterium: nitrogen fixation protein NifU	BAL58052	Bacteria; Chloroflexi; environmental samples	lgpvr lk cal ls	0
193	uncultured crenarchaeote 29d5: NifU family SUF system FeS assembly protein	ACY24469	Archaea; Crenarchaeota; environmental samples	lgpar ik cal ls	0
194	uncultured Desulfobacterium sp.: hypothetical protein N47_G32610	CBX27937	Bacteria; Proteobacteria; Deltaproteobacteria;	llgkq hd cpl ss	0
195	uncultured gamma proteobacterium HF0770_28K04: NifU homolog involved in Fe-S cluster formation	ADI23402	Bacteria; Proteobacteria; Gammaproteobacteria;	tspvr ik cal ls	0
196	uncultured marine crenarchaeote HF4000_ANIW93H17: putative NifU-like N terminal domain protein	ABZ06893	Archaea; Thaumarchaeota; Nitrosopumilales;	tspvr ik cal ls	0
197	uncultured marine crenarchaeote KM3-153-F8: iron-sulfur cluster assembly scaffold protein IscU	ACF09777	Archaea; Thaumarchaeota; Nitrosopumilales;	lgpar ik cal ls	0
198	Verrucosispora maris AB-18-032: NifU family SUF system FeS assembly protein	AEB46281	Bacteria; Actinobacteria; Actinobacteridae;	rypar vk cal lp	0
199	Xylanimonas cellulosilytica DSM 15894: SUF system FeS assembly protein, NifU family	ACZ30393	Bacteria; Actinobacteria; Actinobacteridae;	qypar ik cal lg	0

## Sheet: C at 141
#	C at position 141	accession	organism	12 aa block	aligns	exception	comment
1	Clostridium sp. ASF356: FeS cluster assembly scaffold protein NifU	WP_004034830	Bacteria; Firmicutes; Clostridia;	lppvk vh csc la	+		clostridium
2	Eubacterium sp. CAG:274: feS cluster assembly scaffold protein NifU	WP_022248354	Bacteria; Firmicutes; Clostridia;	lppvk vh csc la	+		clostridium
3	Firmicutes bacterium CAG:102: feS cluster assembly scaffold protein NifU	CCX40254	Bacteria; Firmicutes; environmental samples	lppvk vh csc la	+		firmicutes
4	Firmicutes bacterium CAG:24: sUF system FeS assembly protein NifU family	WP_021915358	Bacteria; Firmicutes; environmental samples	hmpar vk cac lg	0		firmicutes, suf type, aligns poorly
5	Firmicutes bacterium CAG:466: putative uncharacterized protein	CDC27640	Bacteria; Firmicutes; environmental samples	lppvk vh csc la	+		firmicutes
6	uncultured archaeon: NifU-like protein	CBH39215	Archaea; environmental samples	ipaqk lh cac lc	0		archae, suf type, aligns poorly

## Sheet: A at 141
#	A at position 141	accession	organism	12 aa block	aligns	exception
1	Candidatus Phytoplasma australiense: NifU homolog	CAM11878	Bacteria; Tenericutes; Mollicutes;	qfqgr rv cva lp	0
2	Clostridium termitidis CT1112: SUF system FeS assembly protein, NifU family	EMS73399	Bacteria; Firmicutes; Clostridia;	nlpar vk caa mp	0
3	Desulfobacula toluolica Tol2: iron-sulfur cluster assembly protein, related to NifU	YP_006761884	Bacteria; Proteobacteria; Deltaproteobacteria;	lpkee ah caa ha	0
4	Eremococcus coleocola ACS-139-V-Col8: SUF system FeS assembly protein, NifU family	EFR30743	Bacteria; Firmicutes; Bacilli;	kfpar yk caa la	0
5	Lactobacillus brevis subsp. gravesensis ATCC 27305: SUF system FeS assembly protein, NifU family	EEI72013	Bacteria; Firmicutes; Bacilli;	efptr ik caa la	0
6	Pelobacter propionicus: FeS cluster assembly scaffold IscU	WP_011735822	Bacteria; Proteobacteria; Deltaproteobacteria;	lpefk vh csa lg	0
7	Pelotomaculum thermopropionicum SI: NifU homolog	BAF58762	Bacteria; Firmicutes; Clostridia;	lpedh ah caa la	0
8	Spirochaeta smaragdinae DSM 11293: SUF system FeS assembly protein, NifU family	ADK79225	Bacteria; Spirochaetes; Spirochaetales;	rlpvr vk caa la	0
9	Strawberry lethal yellows phytoplasma (CPA) str. NZSb11: NifU-like protein	AGL90262	Bacteria; Tenericutes; Mollicutes;	qfqgr rv cva lp	0
10	Treponema caldaria DSM 7334: SUF system FeS assembly protein, NifU family	AEJ18485	Bacteria; Spirochaetes; Spirochaetales;	rlpvr lk caa ls	0
11	Weissella thailandensis fsh4-2: Fe-S cluster assembly protein NifU	CCC56767	Bacteria; Firmicutes; Bacilli;	efptr vr cga la	0

## Sheet: D at 141
#	D a position 141	accession	organism	12 aa block	aligns	exception
1	Bacillus megaterium DSM 319: hypothetical protein BMD_2771	ADF39612	Bacteria; Firmicutes; Bacilli;	lepsq lh cvd ia	0
2	Calothrix sp. PCC 7103: hypothetical protein	WP_019497090	Bacteria; Cyanobacteria; Nostocales;	lepsq hh cld il	0
3	Desulfomonile tiedjei DSM 6799: iron-sulfur cluster biosynthesis protein, NifU-like protein	YP_006446946	Bacteria; Proteobacteria; Deltaproteobacteria;	lpien th cad la	0
4	Desulfuromonas acetoxidans DSM 684: NifQ	EAT14510	Bacteria; Proteobacteria; Deltaproteobacteria;	lpaer dy cad ia	0
5	Pelobacter carbinolicus DSM 2380: nitrogenase molybdenum-iron cofactor biosynthesis protein NifUQ	ABA87575	Bacteria; Proteobacteria; Deltaproteobacteria;	lpper sy cad la	0
6	Photorhabdus luminescens subsp. laumondii TTO1: hypothetical protein plu4673	NP_931835	Bacteria; Proteobacteria; Gammaproteobacteria;	lepaq qh cld ml	0
7	Thermobaculum terrenum ATCC BAA-798: nitrogen-fixing NifU domain protein	ACZ41786	Bacteria; Thermobaculum	lpqdk ly cad ya	0
8	Vibrio azureus NBRC 104587: putative SUF system FeS assembly protein	GAD77392	Bacteria; Proteobacteria; Gammaproteobacteria;	lepsq rh cld ml	0

## Sheet: E at 141
#	E at position 141	accession	organism	12 aa block	aligns	exception
1	Atopobium minutum 10063974: NifU family SUF system FeS assembly protein	EMZ42303	Bacteria; Actinobacteria; Coriobacteridae;	rmpar vk cae la	0
2	Atopobium sp. oral taxon 810 str. F0209: SUF system FeS assembly protein, NifU family	ERI06143	Bacteria; Actinobacteria; Coriobacteridae;	hmpar vk cae la	0
3	Collinsella aerofaciens ATCC 25986: SUF system FeS assembly protein, NifU family	EBA39337	Bacteria; Actinobacteria; Coriobacteridae;	hmpar vk cae la	0
4	Coriobacteriaceae bacterium BV3Ac1: SUF system FeS assembly protein, NifU family	WP_021735212	Bacteria; Actinobacteria; Coriobacteridae;	hmpar vk cae la	0
5	Coriobacterium glomerans PW2: NifU family SUF system FeS assembly protein	YP_004373058	Bacteria; Actinobacteria; Coriobacteridae;	rmpar vk cae la	0
6	Cryptobacterium curtum DSM 15641: SUF system FeS assembly protein, NifU family	ACU94966	Bacteria; Actinobacteria; Coriobacteridae;	lmpar vk cae lg	0
7	Desulfatibacillum alkenivorans AK-01: nitrogen-fixing NifU domain protein	ACL06641	Bacteria; Proteobacteria; Deltaproteobacteria;	lpedh yh cae la	0
8	Desulfobacter postgatei 2ac9: iron-sulfur cluster biosynthesis protein, NifU-like protein	EIM65028	Bacteria; Proteobacteria; Deltaproteobacteria;	lpedh yh cae lc	0
9	Desulfobacula toluolica Tol2: iron-sulfur cluster assembly protein, NifU-like	YP_006760584	Bacteria; Proteobacteria; Deltaproteobacteria;	lpedh fh cae la	0
10	Desulfococcus multivorans DSM 2059: nitrogen-fixing NifU domain protein	EPR41129	Bacteria; Proteobacteria; Deltaproteobacteria;	lppdh fh cae la	0
11	Desulfomonile tiedjei DSM 6799: iron-sulfur cluster biosynthesis protein, NifU-like protein	YP_006446202	Bacteria; Proteobacteria; Deltaproteobacteria;	lpedk rd cae va	0
12	Eggerthella sp. CAG:209: sUF system FeS assembly protein NifU family	WP_022184693	Bacteria; Actinobacteria; Coriobacteridae;	rmpar vk cae la	0
13	Gordonibacter pamelaeae 7-10-1-b: SUF system FeS assembly protein, NifU family	YP_007803295	Bacteria; Actinobacteria; Coriobacteridae;	rmpar vk cae la	0
14	Halonotius sp. J07HN4: NifU-like protein involved in Fe-S cluster formation	WP_021040162	Archaea; Euryarchaeota; Halobacteria;	ltpsr lq cae li	0
15	Natronorubrum bangense JCM 10635: NifU family SUF system FeS assembly protein	ELY45647	Archaea; Euryarchaeota; Halobacteria;	ltpsr lr cae la	0
16	Nitratifractor salsuginis DSM 16511: nitrogen-fixing NifU domain protein	ADV46015	Bacteria; Proteobacteria; Epsilonproteobacteria;	vppdq aa cse mv	0
17	Olsenella sp. oral taxon 809 str. F0356: NifU family SUF system FeS assembly protein	EHF01523	Bacteria; Actinobacteria; Coriobacteridae;	hmpar vk cae la	0
18	Slackia exigua ATCC 700122: SUF system FeS assembly protein, NifU family	EEZ61205	Bacteria; Actinobacteria; Coriobacteridae;	rmpar vk cae la	0

## Sheet: F at 141
#	F at position 141	accession	organism	12 aa block	aligns	exception
1	delta proteobacterium NaphS2: NifU-like N-terminal domain protein	EFK09227	Bacteria; Proteobacteria; Deltaproteobacteria	fpded rh caf la	0
2	delta proteobacterium NaphS2: NifU-like N-terminal domain protein	EFK07699	Bacteria; Proteobacteria; Deltaproteobacteria	apeke qh caf la	0
3	Desulfomicrobium baculatum DSM 4028: nitrogen-fixing NifU domain protein	ACU88573	Bacteria; Proteobacteria; Deltaproteobacteria;	ipedh hh caf la	0
4	Desulfotomaculum kuznetsovii DSM 6115: nitrogen-fixing NifU domain protein	AEG15456	Bacteria; Firmicutes; Clostridia;	lpees vh caf la	0
5	Ktedonobacter racemifer DSM 44963: SUF system FeS assembly protein, NifU family	EFH88432	Bacteria; Chloroflexi; Ktedonobacteria;	ispar sn caf la	0
6	Ktedonobacter racemifer DSM 44963: SUF system FeS assembly protein, NifU family	EFH87487	Bacteria; Chloroflexi; Ktedonobacteria;	ispar tk caf ls	0

## Sheet: G at 141
#	G at position 141	accession	organism	12 aa block	exception
1	nitrogen-fixing NifU domain protein [Desulfatibacillum alkenivorans AK-01]	ACL06031	Bacteria; Proteobacteria; Deltaproteobacteria;	lpees lh cag la
2	nitrogen-fixing NifU-like protein [Methanolobus psychrophilus R15]	AFV24214	Archaea; Euryarchaeota; Methanomicrobia;	lpkgk dr csg fa
3	Oenococcus oeni AWRIB418: Fe-S cluster formation protein	EJN98688	Bacteria; Firmicutes; Bacilli;	qfptr vk cag la

[truncated: 11 more sheets: H at 141, K at 141, N at 141, P at 141, Q at 141, R at 141, S at 141, T at 141, W at 141, Y at 141, no alignment]
